# Supplementary material for: Synthesis of 2-iminothiazolidin-4-ones via copper-catalyzed [2 + 1 + 2] tandem annulation
Source: Royal Society of Chemistry journal article supplement (doi:10.1039/d2ra07872d), 2023-01-01

## Supporting Information

### Synthesis of 2-Iminothiazolidin-4-ones via Copper-Catalyzed [2 + 1 + 2] Tandem Annulation

Mingming Zhao,<sup>a</sup> Yiming Guo,<sup>a</sup> Qi Wang,<sup>a</sup> Lanqi Liu,<sup>a</sup> Shujie Zhang,<sup>a</sup> Wei Guo,<sup>b,\*</sup> Linping Wu,<sup>a,\*</sup> and Fayang G. Qiu<sup>a,\*</sup>

<sup>a</sup> Guangzhou Institutes of Biomedicine and Health, Chinese Academy of Sciences, Guangzhou 510530, P. R. China; University of Chinese Academy of Sciences, Beijing 100049, P. R. China

<sup>b</sup> Key Laboratory of Organo-pharmaceutical Chemistry of Jiangxi Province, Gannan Normal University, Ganzhou 341000, P. R. China

\*E-mail: guoweigw@126.com; wu\_linping@gibh.ac.cn; qiu\_fayang@gibh.ac.cn

#### Table of contents

|                                                 |     |
|-------------------------------------------------|-----|
| <b>Experimental Section</b> .....               | S2  |
| <b>Screening Reaction Conditions</b> .....      | S2  |
| <b>X-ray Crystallographic Data for 5p</b> ..... | S4  |
| <b>Compound Characterization</b> .....          | S9  |
| <b>References</b> .....                         | S21 |
| <b>NMR Spectra</b> .....                        | S22 |

---

## Experimental Section

### 1. General information

Melting points were tested using a melting point instrument and are uncorrected. IR spectra were collected from an infrared spectrometer on either potassium bromide pellets or liquid films between two potassium bromide pellets (Bruker Tensor 27).  $^1\text{H}$  and  $^{13}\text{C}\{^1\text{H}\}$  NMR spectra were recorded on a Bruker AVANCE 400 ( $^1\text{H}$ : 400 MHz) or a Bruker AVANCE 500 ( $^1\text{H}$ : 500 MHz) instrument. HRMS were recorded on an Agilent Mass spectrometer using ESI-TOF (electrospray ionization-time of flight). TLC was performed using commercially available 100–400 mesh silica gel plates (GF254). Unless otherwise noted, chemicals purchased from the vendors were used without further purification.

### 2. General procedure for synthesis of 2-iminothiazolidin-4-ones derivatives

A mixture of alkyl amines (0.222 mmol, 1.2 equiv), isothiocyanates (0.185 mmol), ethyl 2-diazoacetate (0.278 mmol, 1.5 equiv), CuI (0.074 mmol, 0.4 equiv) was stirred in  $\text{CH}_3\text{CN}/\text{THF}$  ( $v/v = 1:1$ , 2.0 mL) at room temperature (25 °C) for 12 h. After completion of the reaction (monitored by TLC), water (10 mL) was added to the reaction mixture, and the resulting mixture was extracted with ethyl acetate. The combined organic layers were then dried over  $\text{MgSO}_4$ , filtered, and then concentrated in vacuum. The residue was purified by using flash chromatography on silica gel to give the desired product (eluted with a mixture of petroleum ether and ethyl acetate ( $v/v = 15:1$ )).

### 3. The gram-scale synthesis of 4a

To a solution of phenylmethanamine **1a** (7.2 mmol, 0.778 g), phenyl isothiocyanate **2a** (6.0 mmol, 0.810 g), ethyl 2-diazoacetate **3a** (9.0 mmol, 1.141 g) in 60.0 mL of  $\text{CH}_3\text{CN}/\text{THF}$  ( $v/v = 1:1$ ) was added CuI (2.4 mmol, 0.457 g, 0.4 equiv) under air atmosphere. The solution was stirred at room temperature (25 °C) for 12 h (monitored by TLC). Water (30 mL) was added, and the resulting mixture was extracted with ethyl acetate. The combined organic phase was dried over  $\text{MgSO}_4$ , filtered, and then concentrated under reduced pressure. The crude product was purified by using flash column chromatography on silica gel eluted with a mixture of petroleum ether/ethyl acetate ( $v/v = 15:1$ ) to afford the desired compound **4a** (1.44 g, yield of 85%).

### 4. General procedure for synthesis of 2-iminothiazolidin-4-ones derivatives of bioactive molecules

Alkyl amines (0.222 mmol, 1.2 equiv), isothiocyanates (0.185 mmol), ethyl 2-diazoacetate (0.278 mmol, 1.5 equiv), and CuI (0.074 mmol, 0.4 equiv) were added to  $\text{CH}_3\text{CN}/\text{THF}$  ( $v/v = 1:1$ , 2.0 mL). The mixture was stirred at room temperature (25 °C) for 12 h. Then, 4-nitrobenzaldehyde (0.204 mmol, 1.1 equiv), hexahydropyridine (0.370 mmol, 2.0 equiv), and ethanol (1.0 mL) were added, followed by heating under reflux for 12 h. After completion of the reaction (monitored by TLC), the reaction mixture was cooled to room temperature and the solvent was concentrated under reduced pressure. The crude residue was purified by using silica gel chromatography eluted with a mixture of petroleum ether/ethyl acetate ( $v/v = 15:1$ ) to provide the desired product.

## Screening Reaction Conditions

**Table S1. The effect of the amount of CuI<sup>[a]</sup>**

| Entry | CuI (equiv) | Yield (%) <sup>[b]</sup> |
|-------|-------------|--------------------------|
| 1     | 0.2         | 0                        |
| 2     | 0.3         | 0                        |
| 3     | 0.4         | 78                       |
| 4     | 0.5         | 59                       |
| 5     | 0.6         | 46                       |
| 6     | 0.8         | 44                       |
| 7     | 1.0         | 46                       |

<sup>[a]</sup> Reaction conditions: **1a** (0.222 mmol), **2a** (0.185 mmol), **3a** (0.278 mmol) and CuI in CH<sub>3</sub>CN (2 mL), open to air at room temperature (25 °C) for 12 h.

<sup>[b]</sup> Isolated yield.

**Table S2. The ratio of reactants<sup>[a]</sup>**

| Entry | <b>1a:2a:3a</b> (mole ratio) | Yield (%) <sup>[b]</sup> |
|-------|------------------------------|--------------------------|
| 1     | 1.2:1:1.5                    | 78                       |
| 2     | 1.2:1:2.3                    | 57                       |
| 3     | 1.2:2:2.3                    | 26                       |
| 4     | 2.4:1:1.5                    | 43                       |
| 5     | 2.4:1:2.3                    | 56                       |
| 6     | 2.4:1:3.0                    | 75                       |

<sup>[a]</sup> Reaction conditions: **1a**, **2a**, **3a** and CuI (0.4 equiv) in CH<sub>3</sub>CN (2 mL), open to air at room temperature (25 °C) for 12 h.

<sup>[b]</sup> Isolated yield.

**Table S3. The effect of reaction time<sup>[a]</sup>**

| Entry | Time (h) | Yield (%) <sup>[b]</sup> |
|-------|----------|--------------------------|
| 1     | 8        | 59                       |
| 2     | 10       | 60                       |
| 3     | 18       | 16                       |

<sup>[a]</sup> Reaction conditions: **1a** (0.222 mmol), **2a** (0.185 mmol), **3a** (0.278 mmol) and CuI (0.4 equiv) in CH<sub>3</sub>CN (2 mL), open to air

at room temperature (25 °C).

<sup>[b]</sup> Isolated yield.

**Table S4. The effect of reaction temperature<sup>[a]</sup>**

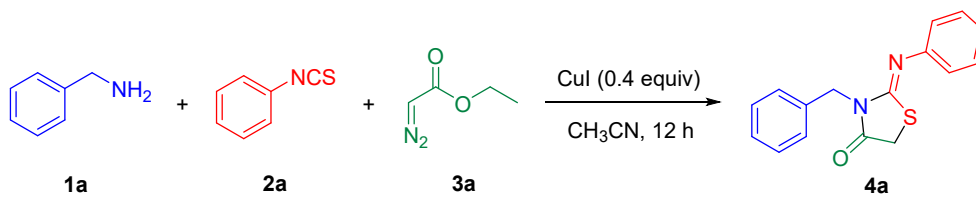

| Entry | T (°C) | Yield (%) <sup>[b]</sup> |
|-------|--------|--------------------------|
| 1     | rt     | 78                       |
| 2     | 40     | 64                       |
| 3     | 50     | 61                       |
| 4     | 60     | 57                       |
| 5     | 70     | 61                       |
| 6     | 80     | 58                       |

<sup>[a]</sup> Reaction conditions: **1a** (0.222 mmol), **2a** (0.185 mmol), **3a** (0.278 mmol) and CuI (0.4 equiv) in CH<sub>3</sub>CN (2 mL), open to air for 12 h.

<sup>[b]</sup> Isolated yield.

### X-ray Crystallographic Data for **5p**

The crystal growth procedure: Compound **5p** (30 mg) was dissolved in 0.5 mL of CH<sub>2</sub>Cl<sub>2</sub>, and then the mixture was added into a solution of petroleum ether (5 mL)/ethyl acetate (5 mL). The mixed solution was evaporated slowly at room temperature (25 °C) to afford the crystals **5p**. Crystal data collection and refinement parameters of **5p** are summarized in Table S5.

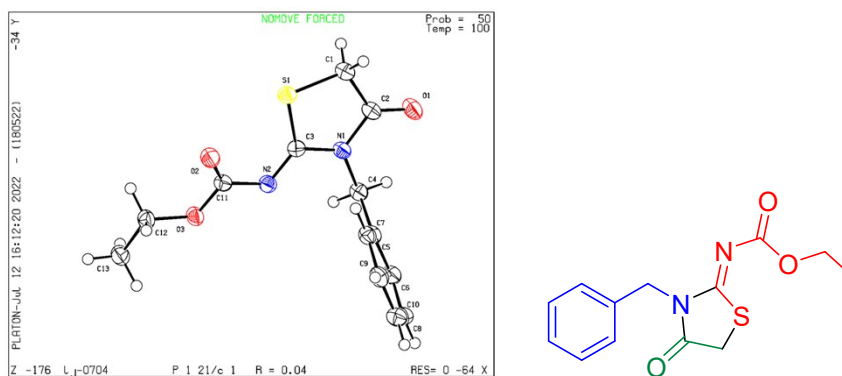

**Figure S1. The Crystal Structure of **5p****

The CCDC number of **5p** is 2190019, the detail information please see 5p.cif document.

**Table S5. Crystal data and structure refinement for compound **5p****

|                     |                                                                 |
|---------------------|-----------------------------------------------------------------|
| Identification code | 2190019                                                         |
| Empirical formula   | C <sub>13</sub> H <sub>14</sub> N <sub>2</sub> O <sub>3</sub> S |
| Formula weight      | 278.32                                                          |

---

|                                             |                                                                      |
|---------------------------------------------|----------------------------------------------------------------------|
| Temperature/K                               | 99.99(10)                                                            |
| Crystal system                              | monoclinic                                                           |
| Space group                                 | P2 <sub>1</sub> /c                                                   |
| a/Å                                         | 18.5249(3)                                                           |
| b/Å                                         | 5.74470(10)                                                          |
| c/Å                                         | 12.9917(2)                                                           |
| $\alpha$ /°                                 | 90.00                                                                |
| $\beta$ /°                                  | 108.935(2)                                                           |
| $\gamma$ /°                                 | 90.00                                                                |
| Volume/Å <sup>3</sup>                       | 1307.76(4)                                                           |
| Z                                           | 4                                                                    |
| $\rho_{\text{calc}}/\text{cm}^3$            | 1.414                                                                |
| $\mu/\text{mm}^{-1}$                        | 2.265                                                                |
| F(000)                                      | 584.0                                                                |
| Radiation                                   | Cu K $\alpha$ ( $\lambda = 1.54184$ )                                |
| 2 $\Theta$ range for data collection/°      | 10.096 to 155.468                                                    |
| Index ranges                                | -22 $\leq$ h $\leq$ 23, -6 $\leq$ k $\leq$ 6, -16 $\leq$ l $\leq$ 15 |
| Reflections collected                       | 6834                                                                 |
| Independent reflections                     | 2654                                                                 |
| Data/restraints/parameters                  | 2654/0/173                                                           |
| Goodness-of-fit on F <sup>2</sup>           | 1.110                                                                |
| Final R indexes [ $I \geq 2\sigma(I)$ ]     | R1 = 0.0351, wR <sub>2</sub> = 0.1016                                |
| Final R indexes [all data]                  | R1 = 0.0363, wR <sub>2</sub> = 0.1029                                |
| Largest diff. peak/hole / e Å <sup>-3</sup> | 0.32/-0.35                                                           |

---

## CIF files of 5p

### checkCIF/PLATON report

Structure factors have been supplied for datablock(s) lj-0704

THIS REPORT IS FOR GUIDANCE ONLY. IF USED AS PART OF A REVIEW PROCEDURE FOR PUBLICATION, IT SHOULD NOT REPLACE THE EXPERTISE OF AN EXPERIENCED CRYSTALLOGRAPHIC REFEREE.

No syntax errors found.      CIF dictionary      Interpreting this report

### Datablock: lj-0704



---

0 **ALERT level A** = Most likely a serious problem - resolve or explain  
1 **ALERT level B** = A potentially serious problem, consider carefully  
1 **ALERT level C** = Check. Ensure it is not caused by an omission or oversight  
4 **ALERT level G** = General information/check it is not something unexpected

1 ALERT type 1 CIF construction/syntax error, inconsistent or missing data  
1 ALERT type 2 Indicator that the structure model may be wrong or deficient  
3 ALERT type 3 Indicator that the structure quality may be low  
1 ALERT type 4 Improvement, methodology, query or suggestion  
0 ALERT type 5 Informative message, check

---

It is advisable to attempt to resolve as many as possible of the alerts in all categories. Often the minor alerts point to easily fixed oversights, errors and omissions in your CIF or refinement strategy, so attention to these fine details can be worthwhile. In order to resolve some of the more serious problems it may be necessary to carry out additional measurements or structure refinements. However, the purpose of your study may justify the reported deviations and the more serious of these should normally be commented upon in the discussion or experimental section of a paper or in the "special\_details" fields of the CIF. checkCIF was carefully designed to identify outliers and unusual parameters, but every test has its limitations and alerts that are not important in a particular case may appear. Conversely, the absence of alerts does not guarantee there are no aspects of the results needing attention. It is up to the individual to critically assess their own results and, if necessary, seek expert advice.

#### **Publication of your CIF in IUCr journals**

A basic structural check has been run on your CIF. These basic checks will be run on all CIFs submitted for publication in IUCr journals (*Acta Crystallographica*, *Journal of Applied Crystallography*, *Journal of Synchrotron Radiation*); however, if you intend to submit to *Acta Crystallographica Section C* or *E* or *IUCrData*, you should make sure that full publication checks are run on the final version of your CIF prior to submission.

#### **Publication of your CIF in other journals**

Please refer to the *Notes for Authors* of the relevant journal for any special instructions relating to CIF submission.

---

**PLATON version of 28/11/2022; check.def file version of 28/11/2022**



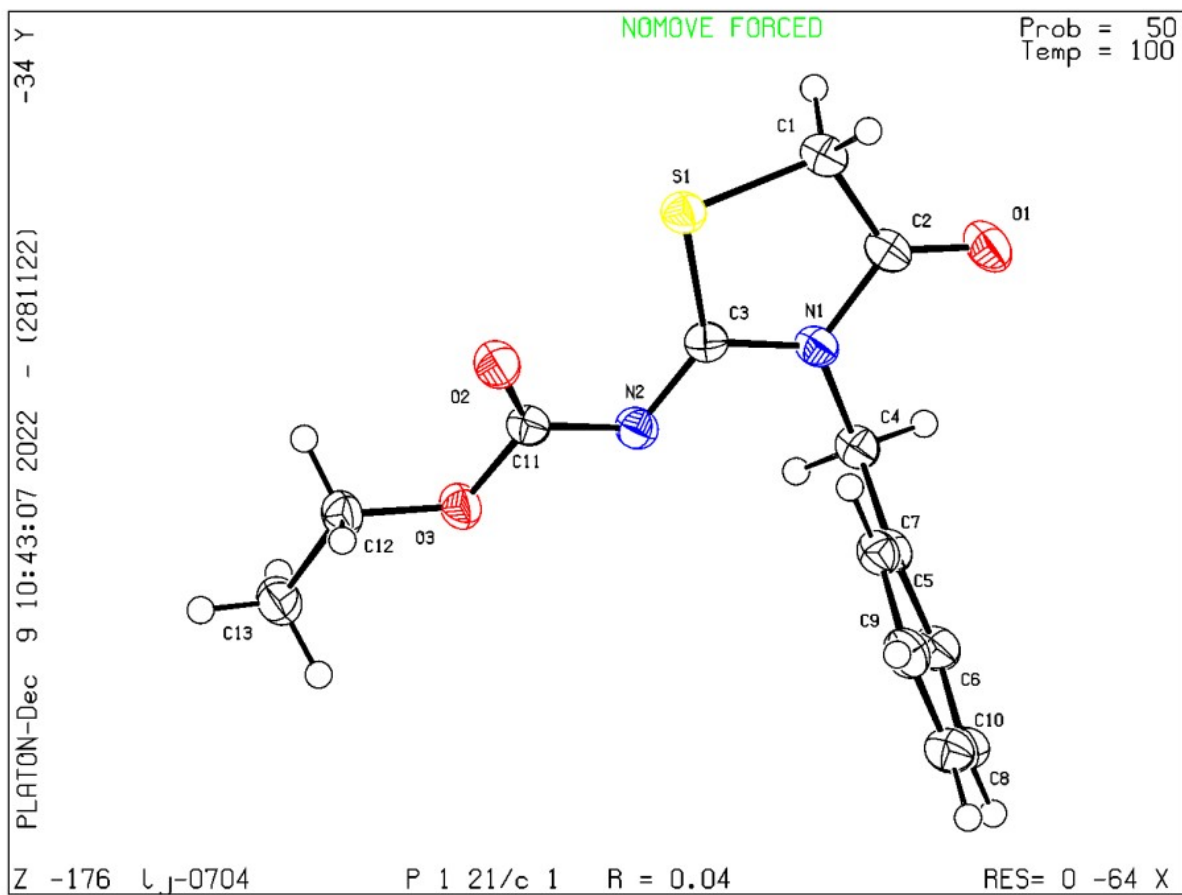



## Compound Characterization

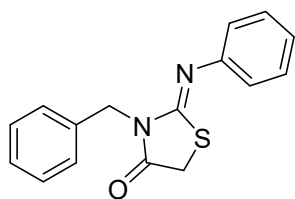

**(Z)-3-Benzyl-2-(phenylimino)thiazolidin-4-one (4a).**<sup>[1]</sup> Eluent: petroleum ether/ethyl acetate (v/v = 15:1). Yellow oil: 85% yield (44.3 mg, 0.16 mmol); IR (KBr,  $\text{cm}^{-1}$ ) 3431, 2930, 1717, 1645, 1594, 1428, 1381, 1325, 1155, 1080, 772, 692;  $^1\text{H}$  NMR (500 MHz,  $\text{CDCl}_3$ , ppm)  $\delta$  7.55 (d,  $J = 7.2$  Hz, 2H), 7.38-7.30 (m, 5H), 7.16 (t,  $J = 7.4$  Hz, 1H), 6.98 (d,  $J = 7.8$  Hz, 2H), 5.05 (s, 2H), 3.79 (s, 2H);  $^{13}\text{C}\{^1\text{H}\}$  NMR (126 MHz,  $\text{CDCl}_3$ , ppm)  $\delta$  171.6, 153.9, 148.0, 136.0, 129.3, 129.1, 128.5, 127.9, 124.7, 121.0, 46.3, 32.7; HRMS (ESI)  $m/z$   $[\text{M} - \text{H}]^-$  calcd for  $\text{C}_{16}\text{H}_{13}\text{N}_2\text{OS}$  281.0754, found 281.0755.

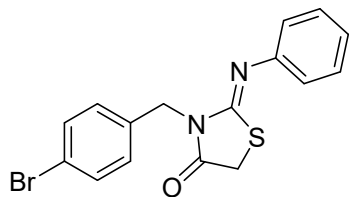

**(Z)-3-(4-Bromobenzyl)-2-(phenylimino)thiazolidin-4-one (4b).**<sup>[1]</sup> Eluent: petroleum ether/ethyl acetate (v/v = 15:1). Yellow solid: 74% yield (49.3 mg, 0.14 mmol); mp 110-112  $^\circ\text{C}$ ; IR (KBr,  $\text{cm}^{-1}$ ) 3419, 3187, 3034, 2932, 1715, 1642, 1590, 1485, 1380, 1262, 1159, 1012, 800, 769, 693;  $^1\text{H}$  NMR (500 MHz,  $\text{CDCl}_3$ , ppm)  $\delta$  7.46 (d,  $J = 8.3$  Hz, 2H), 7.41 (d,  $J = 8.3$  Hz, 2H), 7.35 (t,  $J = 7.7$  Hz, 2H), 7.15 (t,  $J = 7.4$  Hz, 1H), 6.94 (d,  $J = 7.8$  Hz, 2H), 4.97 (s, 2H), 3.81 (s, 2H);  $^{13}\text{C}\{^1\text{H}\}$  NMR (126 MHz,  $\text{CDCl}_3$ , ppm)  $\delta$  171.6, 153.8, 147.8, 134.9, 131.6, 131.0, 129.3, 124.8, 122.1, 121.0, 45.6, 32.7; HRMS (ESI)  $m/z$   $[\text{M} - \text{H}]^-$  calcd for  $\text{C}_{16}\text{H}_{12}\text{BrN}_2\text{OS}$  358.9859, found 358.9858.

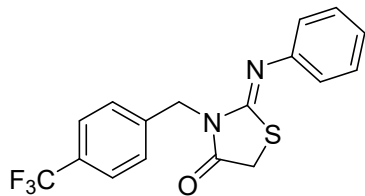

**(Z)-2-(Phenylimino)-3-(4-(trifluoromethyl)benzyl)thiazolidin-4-one (4c).** Eluent: petroleum ether/ethyl acetate (v/v = 15:1). Yellow solid: 70% yield (45.3 mg, 0.13 mmol); mp 121-122  $^\circ\text{C}$ ; IR (KBr,  $\text{cm}^{-1}$ ) 3436, 3034, 2917, 2850, 1720, 1637, 1595, 1378, 1325, 1155, 1066, 871, 770;  $^1\text{H}$  NMR (500 MHz,  $\text{CDCl}_3$ , ppm)  $\delta$  7.62 (q,  $J = 8.2$  Hz, 4H), 7.36 (t,  $J = 7.7$  Hz, 2H), 7.16 (t,  $J = 7.4$  Hz, 1H), 6.95 (d,  $J = 7.6$  Hz, 2H), 5.08 (s, 2H), 3.84 (s, 2H);  $^{13}\text{C}\{^1\text{H}\}$  NMR (126 MHz,  $\text{CDCl}_3$ , ppm)  $\delta$  171.5, 153.7, 147.7, 139.7 (d,  $J = 5.0$  Hz), 130.2 (q,  $J = 130.0$  Hz), 129.3 (d,  $J = 4.2$  Hz), 125.5 (q,  $J = 3.7$  Hz), 125.2, 124.8, 123.0, 120.9, 45.7, 32.7;  $^{19}\text{F}$  NMR (471 MHz,  $\text{CDCl}_3$ , ppm)  $\delta$  -62.56; HRMS (ESI)  $m/z$   $[\text{M} - \text{H}]^-$  calcd for  $\text{C}_{17}\text{H}_{12}\text{F}_3\text{N}_2\text{OS}$  349.0628, found 349.0629.

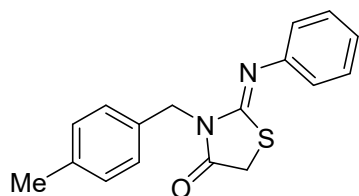

**(Z)-3-(4-Methylbenzyl)-2-(phenylimino)thiazolidin-4-one (4d).**<sup>[1]</sup> Eluent: petroleum ether/ethyl acetate (v/v = 15:1). Yellow solid: 80% yield (43.8 mg, 0.15 mmol); mp 92-94  $^\circ\text{C}$ ; IR (KBr,  $\text{cm}^{-1}$ ) 3435, 3028, 2949, 1722, 1642, 1594, 1425, 1380, 1262, 1155, 1022, 807, 769;  $^1\text{H}$  NMR (500 MHz,  $\text{CDCl}_3$ , ppm)  $\delta$  7.44 (d,  $J = 7.7$  Hz, 2H), 7.35 (t,  $J = 7.6$  Hz, 2H), 7.15 (d,  $J = 7.1$  Hz, 3H), 6.96 (d,  $J = 7.7$  Hz, 2H), 4.99 (s, 2H), 3.79 (s, 2H), 2.35 (s, 3H);  $^{13}\text{C}\{^1\text{H}\}$  NMR (126 MHz,  $\text{CDCl}_3$ , ppm)  $\delta$  171.7, 154.0,

148.0, 137.7, 133.0, 129.3, 129.2, 129.2, 124.6, 121.0, 46.0, 32.7, 21.2; HRMS (ESI)  $m/z$   $[M - H]^-$  calcd for  $C_{17}H_{15}N_2OS$  295.0911, found 295.0910.

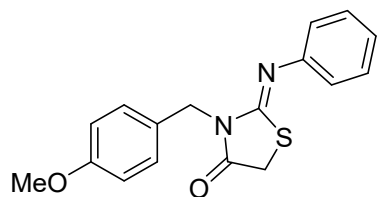

**(Z)-3-(4-Methoxybenzyl)-2-(phenylimino)thiazolidin-4-one (4e).**<sup>[1]</sup> Eluent: petroleum ether/ethyl acetate (v/v = 10:1). Yellow solid; 91% yield (52.5 mg, 0.17 mmol); mp 135-137 °C; IR (KBr,  $cm^{-1}$ ) 3430, 3033, 2952, 1713, 1643, 1591, 1506, 1381, 1246, 1159, 1028, 760, 689;  $^1H$  NMR (500 MHz,  $CDCl_3$ , ppm)  $\delta$  7.50 (d,  $J = 8.5$  Hz, 2H), 7.35 (t,  $J = 7.8$  Hz, 2H), 7.15 (t,  $J = 7.4$  Hz, 1H), 6.97 (d,  $J = 7.6$  Hz, 2H), 6.87 (d,  $J = 8.5$  Hz, 2H), 4.97 (s, 2H), 3.80 (s, 3H), 3.78 (s, 2H);  $^{13}C\{^1H\}$  NMR (126 MHz,  $CDCl_3$ , ppm)  $\delta$  171.6, 159.4, 154.0, 148.0, 130.7, 129.2, 128.3, 124.6, 121.0, 113.8, 55.3, 45.8, 32.7; HRMS (ESI)  $m/z$   $[M - H]^-$  calcd for  $C_{17}H_{15}N_2O_2S$  311.0860, found 311.0860.

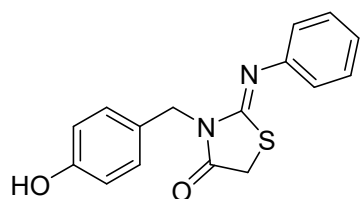

**(Z)-3-(4-Hydroxybenzyl)-2-(phenylimino)thiazolidin-4-one (4f).** Eluent: petroleum ether/ethyl acetate (v/v = 3:1). Yellow solid; 77% yield (42.5 mg, 0.14 mmol); mp 129-130 °C; IR (KBr,  $cm^{-1}$ ) 3395, 3032, 2941, 1705, 1649, 1594, 1515, 1428, 1325, 1262, 1158, 1103, 764, 695;  $^1H$  NMR (500 MHz,  $CDCl_3$ , ppm)  $\delta$  7.41 (d,  $J = 8.3$  Hz, 2H), 7.35 (t,  $J = 7.8$  Hz, 2H), 7.15 (t,  $J = 7.4$  Hz, 1H), 6.96 (d,  $J = 7.6$  Hz, 2H), 6.76 (d,  $J = 8.4$  Hz, 2H), 4.96 (s, 2H), 3.79 (s, 2H);  $^{13}C\{^1H\}$  NMR (126 MHz,  $CDCl_3$ , ppm)  $\delta$  172.2, 155.7, 154.2, 147.9, 130.9, 129.3, 128.0, 124.7, 121.0, 115.3, 45.8, 32.8; HRMS (ESI)  $m/z$   $[M - H]^-$  calcd for  $C_{16}H_{13}N_2O_2S$  297.0703, found 297.0702.

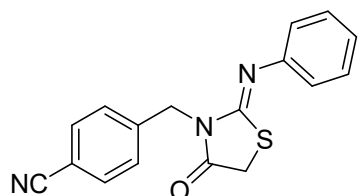

**(Z)-4-((4-Oxo-2-(phenylimino)thiazolidin-3-yl)methyl)benzoinitrile (4g).**<sup>[1]</sup> Eluent: petroleum ether/ethyl acetate (v/v = 5:1). Yellow oil; 87% yield (49.4 mg, 0.16 mmol); IR (KBr,  $cm^{-1}$ ) 3431, 3060, 2924, 2228, 1728, 1633, 1594, 1491, 1390, 1337, 1160, 1025, 768, 697;  $^1H$  NMR (500 MHz,  $CDCl_3$ , ppm)  $\delta$  7.60 (q,  $J = 8.2$  Hz, 4H), 7.34 (t,  $J = 7.7$  Hz, 2H), 7.14 (t,  $J = 7.4$  Hz, 1H), 6.92 (d,  $J = 7.7$  Hz, 2H), 5.05 (s, 2H), 3.84 (s, 2H);  $^{13}C\{^1H\}$  NMR (126 MHz,  $CDCl_3$ , ppm)  $\delta$  171.5, 153.7, 147.5, 141.0, 132.4, 129.6, 129.4, 124.9, 120.9, 118.6, 111.9, 45.8, 32.7; HRMS (ESI)  $m/z$   $[M - H]^-$  calcd for  $C_{17}H_{12}N_3OS$  306.0707, found 306.0705.

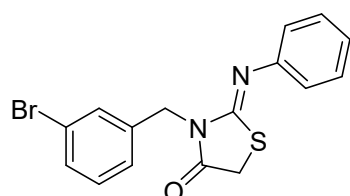

**(Z)-3-(3-Bromobenzyl)-2-(phenylimino)thiazolidin-4-one (4h).**<sup>[1]</sup> Eluent: petroleum ether/ethyl acetate (v/v = 15:1). Yellow solid; 95% yield (63.3 mg, 0.18 mmol); mp 91-93 °C; IR (KBr,  $cm^{-1}$ ) 3431, 3060, 2930, 1717, 1633, 1594, 1378, 1155, 1071, 768, 697;  $^1H$  NMR (500 MHz,  $CDCl_3$ , ppm)  $\delta$  7.70 (s, 1H), 7.46-7.43 (m, 2H), 7.36 (t,  $J = 7.8$  Hz, 2H), 7.21 (t,  $J = 7.8$  Hz, 1H), 7.15 (t,  $J = 7.4$  Hz, 1H), 6.96 (d,  $J = 7.6$  Hz, 2H), 4.99 (s, 2H), 3.83 (s, 2H);  $^{13}C\{^1H\}$  NMR (126 MHz,  $CDCl_3$ , ppm)  $\delta$  171.5,

153.8, 147.7, 138.0, 132.1, 131.1, 130.1, 129.3, 127.8, 124.8, 122.5, 121.0, 45.6, 32.7; HRMS (ESI)  $m/z$   $[M - H]^-$  calcd for  $C_{16}H_{12}BrN_2OS$  358.9859, found 358.9857.

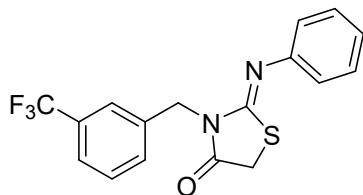

**(Z)-2-(Phenylimino)-3-(3-(trifluoromethyl)benzyl)thiazolidin-4-one (4i).** Eluent: petroleum ether/ethyl acetate ( $v/v = 15:1$ ). Yellow oil: 74% yield (47.9 mg, 0.14 mmol); IR (KBr,  $cm^{-1}$ ) 3439, 3064, 2930, 1725, 1636, 1594, 1378, 1325, 1164, 1071, 768, 697;  $^1H$  NMR (500 MHz,  $CDCl_3$ , ppm)  $\delta$  7.85 (s, 1H), 7.72 (d,  $J = 7.6$  Hz, 1H), 7.58 (d,  $J = 7.7$  Hz, 1H), 7.47 (t,  $J = 7.7$  Hz, 1H), 7.36 (t,  $J = 7.7$  Hz, 2H), 7.16 (t,  $J = 7.4$  Hz, 1H), 6.95 (d,  $J = 7.7$  Hz, 2H), 5.08 (s, 2H), 3.83 (s, 2H);  $^{13}C\{^1H\}$  NMR (126 MHz,  $CDCl_3$ , ppm)  $\delta$  171.5, 153.8, 147.7, 136.8, 132.6, 130.9 (q,  $J = 125.0$  Hz), 129.3, 129.0, 126.2 (q,  $J = 15.0$  Hz), 125.1, 124.8, 123.0, 120.9, 45.8, 32.7;  $^{19}F$  NMR (471 MHz,  $CDCl_3$ , ppm)  $\delta$  -62.55; HRMS (ESI)  $m/z$   $[M - H]^-$  calcd for  $C_{17}H_{12}F_3N_2OS$  349.0628, found 349.0631.

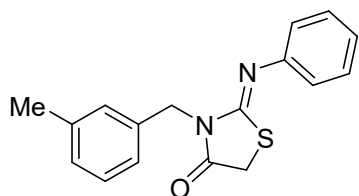

**(Z)-3-(3-Methylbenzyl)-2-(phenylimino)thiazolidin-4-one (4j).**<sup>[1]</sup> Eluent: petroleum ether/ethyl acetate ( $v/v = 15:1$ ). Yellow oil: 70% yield (38.3 mg, 0.13 mmol); IR (KBr,  $cm^{-1}$ ) 3431, 3045, 2937, 1717, 1633, 1594, 1487, 1378, 1325, 1155, 768, 697;  $^1H$  NMR (500 MHz,  $CDCl_3$ , ppm)  $\delta$  7.36 (dd,  $J = 14.2, 7.4$  Hz, 4H), 7.24 (t,  $J = 13.0$  Hz, 1H), 7.15 (dd,  $J = 16.6, 7.7$  Hz, 2H), 6.97 (d,  $J = 7.6$  Hz, 2H), 5.01 (s, 2H), 3.81 (s, 2H), 2.37 (s, 3H);  $^{13}C\{^1H\}$  NMR (126 MHz,  $CDCl_3$ , ppm)  $\delta$  171.7, 154.0, 148.0, 138.2, 135.9, 129.8, 129.3, 128.7, 128.4, 126.2, 124.6, 121.0, 46.3, 32.7, 21.5; HRMS (ESI)  $m/z$   $[M - H]^-$  calcd for  $C_{17}H_{15}N_2OS$  295.0911, found 295.0913.

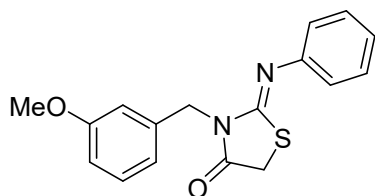

**(Z)-3-(3-Methoxybenzyl)-2-(phenylimino)thiazolidin-4-one (4k).**<sup>[1]</sup> Eluent: petroleum ether/ethyl acetate ( $v/v = 10:1$ ). Yellow oil: 77% yield (44.4 mg, 0.14 mmol); IR (KBr,  $cm^{-1}$ ) 3434, 3055, 2934, 1722, 1633, 1589, 1487, 1379, 1260, 1155, 1040, 768, 694;  $^1H$  NMR (500 MHz,  $CDCl_3$ , ppm)  $\delta$  7.37 (t,  $J = 7.8$  Hz, 2H), 7.28 (d,  $J = 8.1$  Hz, 1H), 7.17 (t,  $J = 7.4$  Hz, 1H), 7.13 (d,  $J = 7.4$  Hz, 2H), 6.98 (d,  $J = 7.6$  Hz, 2H), 6.88-6.87 (m, 1H), 5.03 (s, 2H), 3.82 (s, 3H), 3.81 (s, 2H);  $^{13}C\{^1H\}$  NMR (126 MHz,  $CDCl_3$ , ppm)  $\delta$  171.6, 159.7, 154.0, 148.0, 137.4, 129.5, 129.3, 124.6, 121.4, 121.0, 114.5, 113.6, 55.3, 46.2, 32.7; HRMS (ESI)  $m/z$   $[M - H]^-$  calcd for  $C_{17}H_{15}N_2O_2S$  311.0860, found 311.0861.

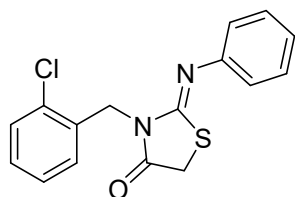

**(Z)-3-(2-Chlorobenzyl)-2-(phenylimino)thiazolidin-4-one (4l).**<sup>[1]</sup> Eluent: petroleum ether/ethyl acetate ( $v/v = 15:1$ ). Yellow oil: 65% yield (38.0 mg, 0.12 mmol); IR (KBr,  $cm^{-1}$ ) 3445, 3055, 2926, 1725, 1644, 1588, 1379, 1162, 1049, 764, 741, 690;  $^1H$  NMR (500 MHz,  $CDCl_3$ , ppm)  $\delta$  7.39 (d,  $J = 7.0$  Hz, 1H), 7.33 (t,  $J = 7.6$  Hz, 2H), 7.23 (s, 2H), 7.18 (d,  $J = 6.7$  Hz, 1H), 7.13 (t,

$J = 7.3$  Hz, 1H), 6.91 (d,  $J = 7.6$  Hz, 2H), 5.18 (s, 2H), 3.91 (s, 2H);  $^{13}\text{C}\{^1\text{H}\}$  NMR (126 MHz,  $\text{CDCl}_3$ , ppm)  $\delta$  171.5, 153.3, 147.7, 133.1, 132.9, 129.7, 129.2, 128.8, 127.6, 126.8, 124.7, 121.0, 44.2, 32.7; HRMS (ESI)  $m/z$   $[\text{M} - \text{H}]^-$  calcd for  $\text{C}_{16}\text{H}_{12}\text{ClN}_2\text{OS}$  315.0364, found 315.0367.

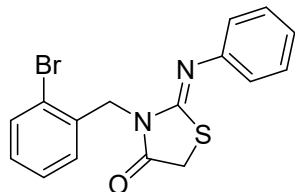

**(Z)-3-(2-Bromobenzyl)-2-(phenylimino)thiazolidin-4-one (4m).** Eluent: petroleum ether/ethyl acetate (v/v = 15:1). Yellow solid: 73% yield (48.6 mg, 0.14 mmol); mp 85-87 °C; IR (KBr,  $\text{cm}^{-1}$ ) 3444, 3055, 2920, 1722, 1643, 1591, 1376, 1159, 1028, 760, 739, 693;  $^1\text{H}$  NMR (500 MHz,  $\text{CDCl}_3$ , ppm)  $\delta$  7.58 (d,  $J = 7.9$  Hz, 1H), 7.35-7.28 (m, 3H), 7.14 (dd,  $J = 14.4$ , 7.1 Hz, 3H), 6.92 (d,  $J = 7.7$  Hz, 2H), 5.14 (s, 2H), 3.92 (s, 2H);  $^{13}\text{C}\{^1\text{H}\}$  NMR (126 MHz,  $\text{CDCl}_3$ , ppm)  $\delta$  171.5, 153.3, 147.6, 134.4, 133.0, 129.2, 128.9, 127.4, 127.2, 124.8, 122.9, 121.0, 46.6, 32.7; HRMS (ESI)  $m/z$   $[\text{M} - \text{H}]^-$  calcd for  $\text{C}_{16}\text{H}_{12}\text{BrN}_2\text{OS}$  358.9859, found 358.9861.

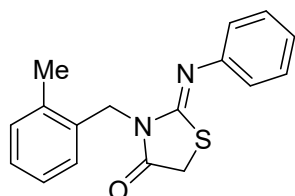

**(Z)-3-(2-Methylbenzyl)-2-(phenylimino)thiazolidin-4-one (4n).** Eluent: petroleum ether/ethyl acetate (v/v = 15:1). Yellow solid: 85% yield (46.5 mg, 0.16 mmol); mp 85-86 °C; IR (KBr,  $\text{cm}^{-1}$ ) 3444, 3055, 2921, 1722, 1643, 1591, 1488, 1376, 1345, 1159, 744, 697;  $^1\text{H}$  NMR (500 MHz,  $\text{CDCl}_3$ , ppm)  $\delta$  7.34 (t,  $J = 7.7$  Hz, 2H), 7.27-7.26 (m, 1H), 7.19 (d,  $J = 3.2$  Hz, 3H), 7.14 (t,  $J = 7.4$  Hz, 1H), 6.94 (d,  $J = 7.6$  Hz, 2H), 5.06 (s, 2H), 3.86 (s, 2H), 2.48 (s, 3H);  $^{13}\text{C}\{^1\text{H}\}$  NMR (126 MHz,  $\text{CDCl}_3$ , ppm)  $\delta$  171.8, 153.9, 147.9, 136.2, 133.8, 130.5, 129.3, 127.5, 127.1, 126.1, 124.7, 121.0, 43.9, 32.7, 19.6; HRMS (ESI)  $m/z$   $[\text{M} - \text{H}]^-$  calcd for  $\text{C}_{17}\text{H}_{15}\text{N}_2\text{OS}$  295.0911, found 295.0914.

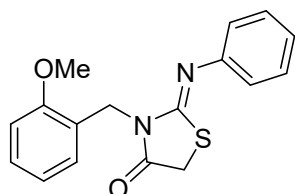

**(Z)-3-(2-Methoxybenzyl)-2-(phenylimino)thiazolidin-4-one (4o).**<sup>[1]</sup> Eluent: petroleum ether/ethyl acetate (v/v = 10:1). Yellow solid: 61% yield (35.2 mg, 0.11 mmol); mp 96-98 °C; IR (KBr,  $\text{cm}^{-1}$ ) 3427, 3034, 2921, 1732, 1632, 1589, 1488, 1380, 1244, 1160, 1025, 748, 692;  $^1\text{H}$  NMR (500 MHz,  $\text{CDCl}_3$ , ppm)  $\delta$  7.34 (t,  $J = 7.7$  Hz, 2H), 7.28 (d,  $J = 6.9$  Hz, 1H), 7.14 (t,  $J = 8.3$  Hz, 2H), 6.95 (t,  $J = 8.5$  Hz, 3H), 6.90 (d,  $J = 8.2$  Hz, 1H), 5.12 (s, 2H), 3.89 (s, 2H), 3.88 (s, 3H);  $^{13}\text{C}\{^1\text{H}\}$  NMR (126 MHz,  $\text{CDCl}_3$ , ppm)  $\delta$  171.6, 157.2, 153.8, 148.1, 129.2, 128.5, 127.4, 124.5, 123.6, 121.0, 120.3, 110.5, 55.5, 41.9, 32.7; HRMS (ESI)  $m/z$   $[\text{M} - \text{H}]^-$  calcd for  $\text{C}_{17}\text{H}_{15}\text{N}_2\text{O}_2\text{S}$  311.0860, found 311.0863.

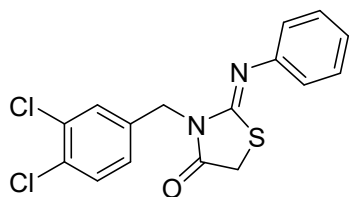

**(Z)-3-(3,4-Dichlorobenzyl)-2-(phenylimino)thiazolidin-4-one (4p).** Eluent: petroleum ether/ethyl acetate (v/v = 15:1). Yellow solid: 81% yield (52.4 mg, 0.15 mmol); mp 127-129 °C; IR (KBr,  $\text{cm}^{-1}$ ) 3427, 3033, 2928, 1715, 1634, 1589, 1472, 1376, 1328, 1159, 1029, 894, 764, 687;  $^1\text{H}$  NMR (500 MHz,  $\text{CDCl}_3$ , ppm)  $\delta$  7.65 (s, 1H), 7.41-7.34 (m, 4H), 7.16 (t,  $J = 7.3$  Hz, 1H), 6.95

(d,  $J = 7.7$  Hz, 2H), 4.96 (s, 2H), 3.82 (s, 2H);  $^{13}\text{C}\{^1\text{H}\}$  NMR (126 MHz,  $\text{CDCl}_3$ , ppm)  $\delta$  171.5, 153.7, 147.6, 136.0, 132.5, 132.2, 131.2, 130.5, 129.4, 128.7, 124.9, 121.0, 45.1, 32.7; HRMS (ESI)  $m/z$   $[\text{M} - \text{H}]^-$  calcd for  $\text{C}_{16}\text{H}_{11}\text{Cl}_2\text{N}_2\text{OS}$  348.9975, found 348.9976.

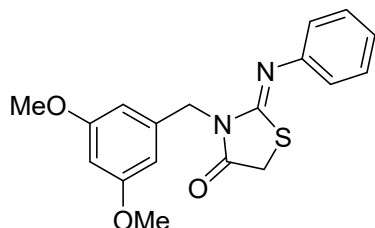

**(Z)-3-(3,5-Dimethoxybenzyl)-2-(phenylimino)thiazolidin-4-one (4q).** Eluent: petroleum ether/ethyl acetate ( $v/v = 5:1$ ). Yellow oil: 63% yield (39.9 mg, 0.12 mmol); IR (KBr,  $\text{cm}^{-1}$ ) 3437, 3032, 2937, 1723, 1632, 1589, 1434, 1380, 1322, 1160, 1067, 768, 692;  $^1\text{H}$  NMR (500 MHz,  $\text{CDCl}_3$ , ppm)  $\delta$  7.35 (t,  $J = 7.8$  Hz, 2H), 7.14 (t,  $J = 7.4$  Hz, 1H), 6.96 (d,  $J = 7.4$  Hz, 2H), 6.69 (d,  $J = 2.2$  Hz, 2H), 6.41 (t,  $J = 2.1$  Hz, 1H), 4.97 (s, 2H), 3.80 (s, 2H), 3.78 (s, 6H);  $^{13}\text{C}\{^1\text{H}\}$  NMR (126 MHz,  $\text{CDCl}_3$ , ppm)  $\delta$  171.6, 160.8, 154.1, 148.0, 138.1, 129.3, 124.6, 121.0, 106.9, 100.1, 55.4, 46.3, 32.7; HRMS (ESI)  $m/z$   $[\text{M} - \text{H}]^-$  calcd for  $\text{C}_{18}\text{H}_{17}\text{N}_2\text{O}_3\text{S}$  341.0965, found 341.0965.

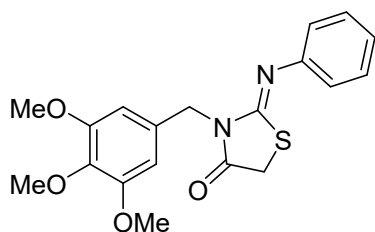

**(Z)-2-(Phenylimino)-3-(3,4,5-trimethoxybenzyl)thiazolidin-4-one (4r).**<sup>[1]</sup> Eluent: petroleum ether/ethyl acetate ( $v/v = 3:1$ ). Yellow solid: 53% yield (36.5 mg, 0.10 mmol); mp 124-125 °C; IR (KBr,  $\text{cm}^{-1}$ ) 3427, 3035, 2928, 1715, 1620, 1589, 1457, 1333, 1328, 1126, 771, 692;  $^1\text{H}$  NMR (500 MHz,  $\text{CDCl}_3$ , ppm)  $\delta$  7.35 (t,  $J = 7.6$  Hz, 2H), 7.14 (t,  $J = 7.3$  Hz, 1H), 6.94 (d,  $J = 7.8$  Hz, 2H), 6.84 (s, 2H), 4.94 (s, 2H), 3.84 (s, 9H), 3.80 (s, 2H);  $^{13}\text{C}\{^1\text{H}\}$  NMR (126 MHz,  $\text{CDCl}_3$ , ppm)  $\delta$  171.7, 154.4, 153.1, 148.1, 137.8, 131.6, 129.4, 124.7, 120.9, 106.8, 60.8, 56.2, 46.5, 32.8; HRMS (ESI)  $m/z$   $[\text{M} - \text{H}]^-$  calcd for  $\text{C}_{19}\text{H}_{19}\text{N}_2\text{O}_4\text{S}$  371.1071, found 371.1075.

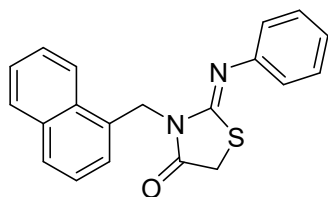

**(Z)-3-(Naphthalen-1-ylmethyl)-2-(phenylimino)thiazolidin-4-one (4s).**<sup>[1]</sup> Eluent: petroleum ether/ethyl acetate ( $v/v = 15:1$ ). Yellow oil: 60% yield (36.9 mg, 0.11 mmol); IR (KBr,  $\text{cm}^{-1}$ ) 3435, 3055, 2925, 1727, 1633, 1594, 1487, 1375, 1325, 1155, 1022, 766, 697;  $^1\text{H}$  NMR (500 MHz,  $\text{CDCl}_3$ , ppm)  $\delta$  8.41 (d,  $J = 8.4$  Hz, 1H), 7.89 (d,  $J = 8.0$  Hz, 1H), 7.83 (d,  $J = 8.2$  Hz, 1H), 7.58 (t,  $J = 7.9$  Hz, 2H), 7.52 (t,  $J = 7.3$  Hz, 1H), 7.46 (t,  $J = 7.6$  Hz, 1H), 7.36 (t,  $J = 7.7$  Hz, 2H), 7.15 (t,  $J = 7.4$  Hz, 1H), 6.95 (d,  $J = 7.7$  Hz, 2H), 5.54 (s, 2H), 3.86 (s, 2H);  $^{13}\text{C}\{^1\text{H}\}$  NMR (126 MHz,  $\text{CDCl}_3$ , ppm)  $\delta$  171.8, 153.9, 147.9, 133.8, 131.5, 130.9, 129.3, 128.7, 128.5, 126.7, 126.4, 125.8, 125.2, 124.7, 123.9, 121.0, 44.3, 32.7; HRMS (ESI)  $m/z$   $[\text{M} - \text{H}]^-$  calcd for  $\text{C}_{20}\text{H}_{15}\text{N}_2\text{OS}$  331.0911, found 331.0912.

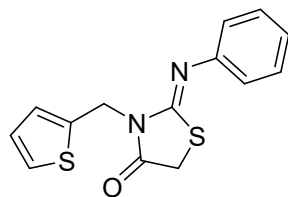

**(Z)-2-(Phenylimino)-3-(thiophen-2-ylmethyl)thiazolidin-4-one (4t).**<sup>[1]</sup> Eluent: petroleum ether/ethyl acetate (v/v = 15:1). Yellow oil: 73% yield (38.9 mg, 0.14 mmol); IR (KBr,  $\text{cm}^{-1}$ ) 3428, 3034, 2922, 1723, 1632, 1589, 1420, 1380, 1322, 1140, 1022, 772, 692;  $^1\text{H}$  NMR (500 MHz,  $\text{CDCl}_3$ , ppm)  $\delta$  7.37 (t,  $J = 7.7$  Hz, 2H), 7.26 (d,  $J = 4.8$  Hz, 1H), 7.23 (d,  $J = 2.8$  Hz, 1H), 7.16 (t,  $J = 7.4$  Hz, 1H), 7.02 (d,  $J = 7.6$  Hz, 2H), 6.98-6.96 (m, 1H), 5.18 (s, 2H), 3.79 (s, 2H);  $^{13}\text{C}\{^1\text{H}\}$  NMR (126 MHz,  $\text{CDCl}_3$ , ppm)  $\delta$  171.1, 153.4, 147.8, 137.1, 129.3, 128.6, 126.5, 126.3, 124.7, 121.0, 40.6, 32.8; HRMS (ESI)  $m/z$   $[\text{M} - \text{H}]^-$  calcd for  $\text{C}_{14}\text{H}_{11}\text{N}_2\text{OS}_2$  287.0318, found 287.0321.

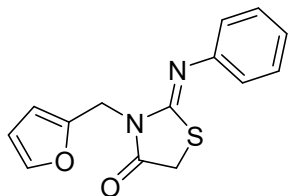

**(Z)-3-(Furan-2-ylmethyl)-2-(phenylimino)thiazolidin-4-one (4u).**<sup>[1]</sup> Eluent: petroleum ether/ethyl acetate (v/v = 15:1). Yellow oil: 65% yield (32.7 mg, 0.12 mmol); IR (KBr,  $\text{cm}^{-1}$ ) 3437, 3035, 2923, 1723, 1632, 1589, 1380, 1322, 1157, 1066, 768, 697;  $^1\text{H}$  NMR (500 MHz,  $\text{CDCl}_3$ , ppm)  $\delta$  7.37-7.33 (m, 3H), 7.14 (t,  $J = 7.4$  Hz, 1H), 6.96 (d,  $J = 7.5$  Hz, 2H), 6.42 (d,  $J = 3.1$  Hz, 1H), 6.34-6.33 (m, 1H), 5.03 (s, 2H), 3.82 (s, 2H);  $^{13}\text{C}\{^1\text{H}\}$  NMR (126 MHz,  $\text{CDCl}_3$ , ppm)  $\delta$  171.3, 153.4, 149.1, 147.9, 142.3, 129.3, 124.7, 121.0, 110.5, 109.6, 39.1, 32.7; HRMS (ESI)  $m/z$   $[\text{M} - \text{H}]^-$  calcd for  $\text{C}_{14}\text{H}_{11}\text{N}_2\text{O}_2\text{S}$  271.0547, found 271.0545.

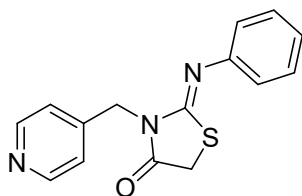

**(Z)-2-(Phenylimino)-3-(pyridin-4-ylmethyl)thiazolidin-4-one (4v).**<sup>[2]</sup> Eluent: petroleum ether/ethyl acetate (v/v = 1:1). Yellow solid: 60% yield (31.4 mg, 0.11 mmol); mp 116-118  $^{\circ}\text{C}$ ; IR (KBr,  $\text{cm}^{-1}$ ) 3439, 3075, 3050, 2963, 2912, 1722, 1642, 1592, 1416, 1375, 1357, 1261, 1166, 1026, 801, 774, 706;  $^1\text{H}$  NMR (400 MHz,  $\text{CDCl}_3$ , ppm)  $\delta$  8.60 (s, 2H), 7.36-7.32 (m, 4H), 7.15 (t,  $J = 7.4$  Hz, 1H), 6.92 (d,  $J = 7.7$  Hz, 2H), 5.02 (s, 2H), 3.88 (s, 2H);  $^{13}\text{C}\{^1\text{H}\}$  NMR (100 MHz,  $\text{CDCl}_3$ , ppm)  $\delta$  171.5, 153.5, 150.0, 147.5, 144.5, 129.3, 124.9, 123.5, 120.9, 45.2, 32.7; HRMS (ESI)  $m/z$   $[\text{M} + \text{H}]^+$  calcd for  $\text{C}_{15}\text{H}_{14}\text{N}_3\text{OS}$  284.0852, found 284.0853.

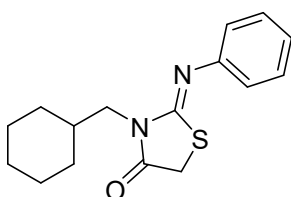

**(Z)-3-(Cyclohexylmethyl)-2-(phenylimino)thiazolidin-4-one (4w).**<sup>[1]</sup> Eluent: petroleum ether/ethyl acetate (v/v = 15:1). Yellow solid: 73% yield (38.9 mg, 0.14 mmol); mp 91-92  $^{\circ}\text{C}$ ; IR (KBr,  $\text{cm}^{-1}$ ) 3435, 3050, 2931, 1723, 1640, 1590, 1380, 1351, 1136, 1024, 772, 700;  $^1\text{H}$  NMR (400 MHz,  $\text{CDCl}_3$ , ppm)  $\delta$  7.34 (t,  $J = 7.5$  Hz, 2H), 7.13 (t,  $J = 7.2$  Hz, 1H), 6.94 (d,  $J = 7.6$  Hz, 2H), 3.80 (s, 2H), 3.72 (d,  $J = 7.3$  Hz, 2H), 1.95-1.92 (m, 1H), 1.70 (d,  $J = 16.7$  Hz, 4H), 1.34-1.16 (m, 4H), 1.06 (dd,  $J = 22.6$ , 11.0 Hz, 2H);  $^{13}\text{C}\{^1\text{H}\}$  NMR (100 MHz,  $\text{CDCl}_3$ , ppm)  $\delta$  172.1, 154.7, 148.2, 129.3, 124.6, 121.0, 49.1, 35.9, 32.6, 30.7, 26.3, 25.8; HRMS (ESI)  $m/z$   $[\text{M} - \text{H}]^-$  calcd for  $\text{C}_{16}\text{H}_{19}\text{N}_2\text{OS}$  287.1224, found 287.1226.

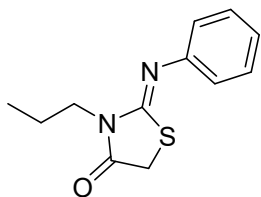

**(Z)-2-(Phenylimino)-3-propylthiazolidin-4-one (4x).** Eluent: petroleum ether/ethyl acetate (v/v = 15:1). Yellow oil: 89% yield (38.5 mg, 0.16 mmol); IR (KBr,  $\text{cm}^{-1}$ ) 3435, 3055, 2925, 1727, 1633, 1594, 1487, 1375, 1325, 1191, 1124, 766, 697;  $^1\text{H}$  NMR (500 MHz,  $\text{CDCl}_3$ , ppm)  $\delta$  7.35 (t,  $J = 7.8$  Hz, 2H), 7.14 (t,  $J = 7.4$  Hz, 1H), 6.95 (d,  $J = 7.6$  Hz, 2H), 3.82 (t,  $J = 7.5$  Hz, 2H), 3.80 (s, 2H), 1.77 (dt,  $J = 14.9, 7.5$  Hz, 2H), 0.98 (t,  $J = 7.4$  Hz, 3H);  $^{13}\text{C}\{^1\text{H}\}$  NMR (126 MHz,  $\text{CDCl}_3$ , ppm)  $\delta$  171.9, 154.4, 148.2, 129.3, 124.6, 121.0, 44.8, 32.7, 20.6, 11.3; HRMS (ESI)  $m/z$   $[\text{M} - \text{H}]^-$  calcd for  $\text{C}_{12}\text{H}_{13}\text{N}_2\text{OS}$  233.0754, found 233.0756.

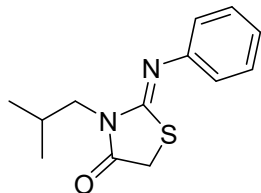

**(Z)-3-Isobutyl-2-(phenylimino)thiazolidin-4-one (4y).**<sup>[3]</sup> Eluent: petroleum ether/ethyl acetate (v/v = 15:1). Yellow oil: 70% yield (32.1 mg, 0.13 mmol); IR (KBr,  $\text{cm}^{-1}$ ) 3437, 3054, 2961, 2938, 1729, 1633, 1593, 1454, 1381, 1262, 1129, 1025, 798, 767, 696;  $^1\text{H}$  NMR (500 MHz,  $\text{CDCl}_3$ , ppm)  $\delta$  7.34 (t,  $J = 7.7$  Hz, 2H), 7.14 (t,  $J = 7.4$  Hz, 1H), 6.94 (d,  $J = 7.6$  Hz, 2H), 3.81 (s, 2H), 3.70 (d,  $J = 7.5$  Hz, 2H), 2.32-2.24 (m, 1H), 0.97 (d,  $J = 6.7$  Hz, 6H);  $^{13}\text{C}\{^1\text{H}\}$  NMR (126 MHz,  $\text{CDCl}_3$ , ppm)  $\delta$  172.1, 154.6, 148.2, 129.2, 124.5, 120.9, 50.2, 32.6, 26.7, 20.1; HRMS (ESI)  $m/z$   $[\text{M} + \text{H}]^+$  calcd for  $\text{C}_{13}\text{H}_{17}\text{N}_2\text{OS}$  249.1056, found 249.1058.

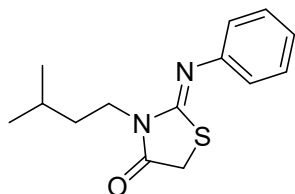

**(Z)-3-Isopentyl-2-(phenylimino)thiazolidin-4-one (4za).** Eluent: petroleum ether/ethyl acetate (v/v = 15:1). Yellow oil: 80% yield (38.8 mg, 0.15 mmol); IR (KBr,  $\text{cm}^{-1}$ ) 3435, 3055, 2925, 1727, 1633, 1504, 1375, 1325, 1243, 1155, 1022, 766, 697;  $^1\text{H}$  NMR (400 MHz,  $\text{CDCl}_3$ , ppm)  $\delta$  7.35 (t,  $J = 7.5$  Hz, 2H), 7.14 (t,  $J = 7.3$  Hz, 1H), 6.96 (d,  $J = 7.6$  Hz, 2H), 3.87 (t,  $J = 7.2$  Hz, 2H), 3.78 (s, 2H), 1.66-1.58 (m, 3H), 0.98 (d,  $J = 5.9$  Hz, 6H);  $^{13}\text{C}\{^1\text{H}\}$  NMR (100 MHz,  $\text{CDCl}_3$ , ppm)  $\delta$  171.7, 154.2, 148.2, 129.3, 124.6, 121.0, 41.9, 35.9, 32.7, 26.1, 22.5; HRMS (ESI)  $m/z$   $[\text{M} - \text{H}]^-$  calcd for  $\text{C}_{14}\text{H}_{17}\text{N}_2\text{OS}$  261.1067, found 261.1067.

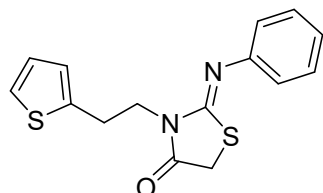

**(Z)-2-(Phenylimino)-3-(2-(thiophen-2-yl)ethyl)thiazolidin-4-one (4zb).** Eluent: petroleum ether/ethyl acetate (v/v = 15:1). Yellow oil: 59% yield (33.0 mg, 0.11 mmol); IR (KBr,  $\text{cm}^{-1}$ ) 3435, 3055, 2925, 1720, 1633, 1594, 1487, 1375, 1175, 1075, 770, 695;  $^1\text{H}$  NMR (500 MHz,  $\text{CDCl}_3$ , ppm)  $\delta$  7.36 (t,  $J = 7.7$  Hz, 2H), 7.16 (dd,  $J = 15.7, 6.4$  Hz, 2H), 6.97-6.91 (m, 4H), 4.14 (t,  $J = 7.3$  Hz, 2H), 3.77 (s, 2H), 3.29 (t,  $J = 7.2$  Hz, 2H);  $^{13}\text{C}\{^1\text{H}\}$  NMR (126 MHz,  $\text{CDCl}_3$ , ppm)  $\delta$  171.5, 154.0, 148.0, 140.0, 129.3, 127.0, 125.7, 124.7, 124.1, 121.0, 44.1, 32.7, 27.1; HRMS (ESI)  $m/z$   $[\text{M} - \text{H}]^-$  calcd for  $\text{C}_{15}\text{H}_{13}\text{N}_2\text{OS}_2$  301.0475, found 301.0473.

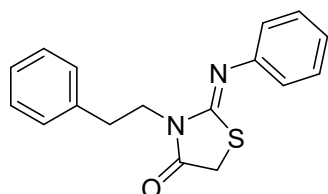

**(Z)-3-Phenethyl-2-(phenylimino)thiazolidin-4-one (4zc).** Eluent: petroleum ether/ethyl acetate (v/v = 15:1). Yellow solid: 92% yield (50.4 mg, 0.17 mmol); mp 118-120  $^{\circ}\text{C}$ ; IR (KBr,  $\text{cm}^{-1}$ ) 3429, 3036, 2923, 1720, 1637, 1589, 1380, 1322, 1151, 1066, 768,



697;  $^1\text{H}$  NMR (500 MHz,  $\text{CDCl}_3$ , ppm)  $\delta$  7.36 (t,  $J = 7.8$  Hz, 2H), 7.30 (dd,  $J = 12.8, 6.9$  Hz, 4H), 7.26-7.23 (m, 1H), 7.15 (t,  $J = 7.4$  Hz, 1H), 6.92 (d,  $J = 7.6$  Hz, 2H), 4.11 (t,  $J = 7.5$  Hz, 2H), 3.75 (s, 2H), 3.05 (t,  $J = 7.5$  Hz, 2H);  $^{13}\text{C}\{^1\text{H}\}$  NMR (126 MHz,  $\text{CDCl}_3$ , ppm)  $\delta$  171.6, 154.0, 148.1, 138.1, 129.3, 129.1, 128.5, 126.6, 124.6, 121.0, 44.2, 33.2, 32.6; HRMS (ESI)  $m/z$   $[\text{M} - \text{H}]^-$  calcd for  $\text{C}_{17}\text{H}_{15}\text{N}_2\text{OS}$  295.0911, found 295.0908.

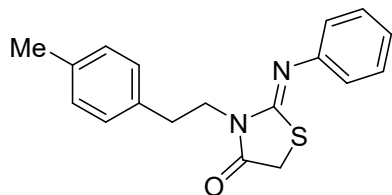

**(Z)-3-(4-Methylphenethyl)-2-(phenylimino)thiazolidin-4-one (4zd).** Eluent: petroleum ether/ethyl acetate (v/v = 15:1). Yellow oil: 85% yield (48.7 mg, 0.16 mmol); IR (KBr,  $\text{cm}^{-1}$ ) 3434, 3045, 2934, 1725, 1630, 1592, 1383, 1344, 1211, 1155, 1025, 768, 696;  $^1\text{H}$  NMR (500 MHz,  $\text{CDCl}_3$ , ppm)  $\delta$  7.35 (t,  $J = 7.6$  Hz, 2H), 7.16 (t,  $J = 7.5$  Hz, 3H), 7.12 (d,  $J = 7.6$  Hz, 2H), 6.92 (d,  $J = 7.7$  Hz, 2H), 4.07 (t,  $J = 8.0$  Hz, 2H), 3.75 (s, 2H), 3.00 (t,  $J = 7.5$  Hz, 2H), 2.33 (s, 3H);  $^{13}\text{C}\{^1\text{H}\}$  NMR (126 MHz,  $\text{CDCl}_3$ , ppm)  $\delta$  171.6, 154.0, 148.1, 136.1, 135.0, 129.2, 129.2, 128.9, 124.6, 121.0, 44.3, 32.7, 32.7, 21.1; HRMS (ESI)  $m/z$   $[\text{M} - \text{H}]^-$  calcd for  $\text{C}_{18}\text{H}_{17}\text{N}_2\text{OS}$  309.1067, found 309.1067.

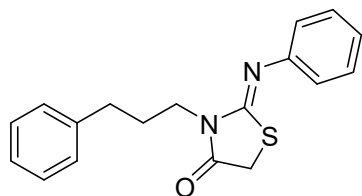

**(Z)-2-(Phenylimino)-3-(3-phenylpropyl)thiazolidin-4-one (4ze).**<sup>[1]</sup> Eluent: petroleum ether/ethyl acetate (v/v = 15:1). Yellow oil: 60% yield (34.4 mg, 0.11 mmol); IR (KBr,  $\text{cm}^{-1}$ ) 3431, 3024, 2930, 1717, 1643, 1594, 1428, 1389, 1207, 1145, 768, 697;  $^1\text{H}$  NMR (500 MHz,  $\text{CDCl}_3$ , ppm)  $\delta$  7.36 (t,  $J = 7.8$  Hz, 2H), 7.30 (t,  $J = 7.5$  Hz, 2H), 7.24 (d,  $J = 7.3$  Hz, 2H), 7.20 (t,  $J = 7.2$  Hz, 1H), 7.16 (t,  $J = 7.4$  Hz, 1H), 6.97 (d,  $J = 7.6$  Hz, 2H), 3.94 (t,  $J = 7.3$  Hz, 2H), 3.72 (s, 2H), 2.73 (t,  $J = 7.5$  Hz, 2H), 2.14-2.08 (m, 2H);  $^{13}\text{C}\{^1\text{H}\}$  NMR (126 MHz,  $\text{CDCl}_3$ , ppm)  $\delta$  171.8, 154.3, 148.1, 141.2, 129.3, 128.4, 128.3, 126.0, 124.6, 121.0, 43.1, 33.2, 32.7, 28.3; HRMS (ESI)  $m/z$   $[\text{M} - \text{H}]^-$  calcd for  $\text{C}_{18}\text{H}_{17}\text{N}_2\text{OS}$  309.1067, found 309.1067.

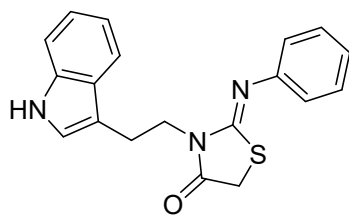

**(Z)-3-(2-(1H-Indol-3-yl)ethyl)-2-(phenylimino)thiazolidin-4-one (4zf).** Eluent: petroleum ether/ethyl acetate (v/v = 5:1). Yellow solid: 77% yield (47.7 mg, 0.14 mmol); mp 155-156  $^{\circ}\text{C}$ ; IR (KBr,  $\text{cm}^{-1}$ ) 3348, 3050, 2968, 1723, 1619, 1586, 1372, 1157, 1098, 1011, 744, 697;  $^1\text{H}$  NMR (500 MHz,  $\text{CDCl}_3$ , ppm)  $\delta$  8.08 (s, 1H), 7.78 (d,  $J = 7.8$  Hz, 1H), 7.36 (dd,  $J = 13.0, 5.4$  Hz, 3H), 7.17 (ddd,  $J = 21.6, 14.9, 7.2$  Hz, 3H), 7.10 (s, 1H), 6.95 (d,  $J = 7.6$  Hz, 2H), 4.18 (t,  $J = 8.0$  Hz, 2H), 3.74 (s, 2H), 3.22 (t,  $J = 7.5$  Hz, 2H);  $^{13}\text{C}\{^1\text{H}\}$  NMR (126 MHz,  $\text{CDCl}_3$ , ppm)  $\delta$  171.8, 154.2, 148.2, 136.2, 129.3, 127.7, 124.6, 122.3, 122.1, 121.1, 119.6, 118.9, 112.5, 111.1, 43.8, 32.8, 23.0; HRMS (ESI)  $m/z$   $[\text{M} - \text{H}]^-$  calcd for  $\text{C}_{19}\text{H}_{16}\text{N}_3\text{OS}$  334.1020, found 334.1017.

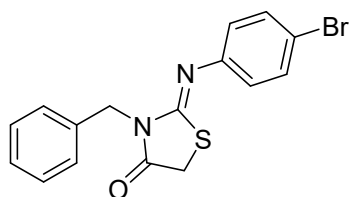

**(Z)-3-Benzyl-2-((4-bromophenyl)imino)thiazolidin-4-one (5a).**<sup>[1]</sup> Eluent: petroleum ether/ethyl acetate (v/v = 15:1). Yellow

solid: 72% yield (48.0 mg, 0.13 mmol); mp 103-105 °C; IR (KBr,  $\text{cm}^{-1}$ ) 3330, 3069, 3030, 2963, 2929, 1723, 1627, 1580, 1483, 1385, 1335, 1151, 1007, 831, 701, 676;  $^1\text{H}$  NMR (500 MHz,  $\text{CDCl}_3$ , ppm)  $\delta$  7.50 (d,  $J = 7.0$  Hz, 2H), 7.45 (d,  $J = 8.4$  Hz, 2H), 7.35-7.29 (m, 3H), 6.83 (d,  $J = 8.4$  Hz, 2H), 5.01 (s, 2H), 3.83 (s, 2H);  $^{13}\text{C}\{^1\text{H}\}$  NMR (126 MHz,  $\text{CDCl}_3$ , ppm)  $\delta$  171.5, 154.6, 146.9, 135.8, 132.3, 129.1, 128.5, 128.0, 122.8, 117.7, 46.3, 32.8; HRMS (ESI)  $m/z$   $[\text{M} - \text{H}]^-$  calcd for  $\text{C}_{16}\text{H}_{12}\text{BrN}_2\text{OS}$  358.9859, found 358.9858.

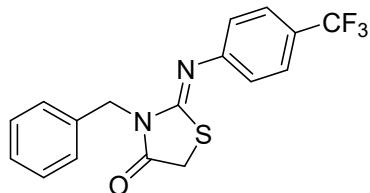

**(Z)-3-Benzyl-2-((4-(trifluoromethyl)phenyl)imino)thiazolidin-4-one (5b).**<sup>[1]</sup> Eluent: petroleum ether/ethyl acetate (v/v = 15:1). Yellow solid: 91% yield (58.9 mg, 0.17 mmol); mp 95-96 °C; IR (KBr,  $\text{cm}^{-1}$ ) 3331, 3068, 3034, 2982, 2939, 1734, 1633, 1607, 1384, 1371, 1161, 1065, 847, 702, 671;  $^1\text{H}$  NMR (500 MHz,  $\text{CDCl}_3$ , ppm)  $\delta$  7.60 (d,  $J = 8.2$  Hz, 2H), 7.51 (d,  $J = 6.7$  Hz, 2H), 7.36-7.32 (m, 3H), 7.03 (d,  $J = 8.2$  Hz, 2H), 5.02 (s, 2H), 3.85 (s, 2H);  $^{13}\text{C}\{^1\text{H}\}$  NMR (126 MHz,  $\text{CDCl}_3$ , ppm)  $\delta$  171.4, 155.0, 151.0, 135.7, 129.1, 128.6, 128.1, 126.5 (q,  $J = 3.7$  Hz), 126.1 (d,  $J = 179.6$  Hz), 123.4 (d,  $J = 46.5$  Hz), 121.3, 46.4, 32.8;  $^{19}\text{F}$  NMR (471 MHz,  $\text{CDCl}_3$ , ppm)  $\delta$  -61.94; HRMS (ESI)  $m/z$   $[\text{M} - \text{H}]^-$  calcd for  $\text{C}_{17}\text{H}_{12}\text{F}_3\text{N}_2\text{OS}$  349.0628, found 349.0629.

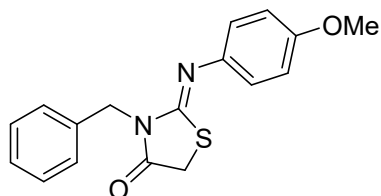

**(Z)-3-Benzyl-2-((4-methoxyphenyl)imino)thiazolidin-4-one (5c).**<sup>[1]</sup> Eluent: petroleum ether/ethyl acetate (v/v = 10:1). Yellow oil: 90% yield (51.9 mg, 0.17 mmol); IR (KBr,  $\text{cm}^{-1}$ ) 3435, 3055, 2925, 1727, 1633, 1504, 1375, 1325, 1243, 1155, 1022, 828, 766, 697;  $^1\text{H}$  NMR (500 MHz,  $\text{CDCl}_3$ , ppm)  $\delta$  7.52 (d,  $J = 7.0$  Hz, 2H), 7.32 (dq,  $J = 13.9, 6.8$  Hz, 3H), 6.90 (q,  $J = 8.9$  Hz, 4H), 5.03 (s, 2H), 3.81 (s, 5H);  $^{13}\text{C}\{^1\text{H}\}$  NMR (126 MHz,  $\text{CDCl}_3$ , ppm)  $\delta$  171.7, 156.8, 153.6, 141.1, 136.0, 129.1, 128.5, 127.9, 122.1, 114.5, 55.5, 46.3, 32.7; HRMS (ESI)  $m/z$   $[\text{M} - \text{H}]^-$  calcd for  $\text{C}_{17}\text{H}_{15}\text{N}_2\text{O}_2\text{S}$  311.0860, found 311.0859.

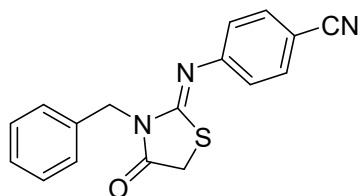

**(Z)-4-((3-Benzyl-4-oxothiazolidin-2-ylidene)amino)benzonitrile (5d).**<sup>[1]</sup> Eluent: petroleum ether/ethyl acetate (v/v = 5:1). Yellow oil: 71% yield (40.3 mg, 0.13 mmol); IR (KBr,  $\text{cm}^{-1}$ ) 3425, 3034, 2965, 2223, 1727, 1630, 1592, 1494, 1380, 1155, 1080, 843, 696;  $^1\text{H}$  NMR (500 MHz,  $\text{CDCl}_3$ , ppm)  $\delta$  7.63 (d,  $J = 8.3$  Hz, 2H), 7.48 (d,  $J = 6.7$  Hz, 2H), 7.36-7.32 (m, 3H), 7.02 (d,  $J = 8.3$  Hz, 2H), 5.01 (s, 2H), 3.87 (s, 2H);  $^{13}\text{C}\{^1\text{H}\}$  NMR (126 MHz,  $\text{CDCl}_3$ , ppm)  $\delta$  171.3, 155.4, 152.0, 135.5, 133.5, 129.1, 128.6, 128.1, 122.0, 119.0, 108.0, 46.4, 32.8; HRMS (ESI)  $m/z$   $[\text{M} - \text{H}]^-$  calcd for  $\text{C}_{17}\text{H}_{12}\text{N}_3\text{OS}$  306.0707, found 306.0710.

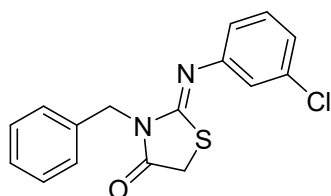

**(Z)-3-Benzyl-2-((3-chlorophenyl)imino)thiazolidin-4-one (5e).**<sup>[1]</sup> Eluent: petroleum ether/ethyl acetate (v/v = 15:1). Yellow oil: 98% yield (57.3 mg, 0.18 mmol); IR (KBr,  $\text{cm}^{-1}$ ) 3436, 3038, 2933, 1727, 1631, 1585, 1380, 1339, 1164, 1083, 784, 694;

<sup>1</sup>H NMR (500 MHz, CDCl<sub>3</sub>, ppm) δ 7.51 (d, *J* = 7.0 Hz, 2H), 7.37-7.31 (m, 3H), 7.28 (t, *J* = 7.9 Hz, 1H), 7.13 (d, *J* = 7.9 Hz, 1H), 6.97 (s, 1H), 6.85 (d, *J* = 7.8 Hz, 1H), 5.02 (s, 2H), 3.84 (s, 2H); <sup>13</sup>C{<sup>1</sup>H} NMR (126 MHz, CDCl<sub>3</sub>, ppm) δ 171.5, 155.0, 149.2, 135.8, 134.7, 130.3, 129.1, 128.6, 128.0, 124.7, 121.4, 119.3, 46.3, 32.8; HRMS (ESI) *m/z* [M – H]<sup>–</sup> calcd for C<sub>16</sub>H<sub>12</sub>ClN<sub>2</sub>OS 315.0364, found 315.0361.

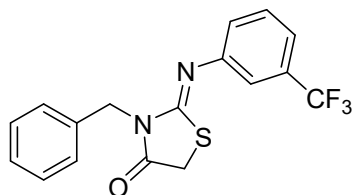

**(Z)-3-Benzyl-2-((3-(trifluoromethyl)phenyl)imino)thiazolidin-4-one (5f).** Eluent: petroleum ether/ethyl acetate (v/v = 15:1). Yellow oil: 97% yield (62.8 mg, 0.18 mmol); IR (KBr, cm<sup>-1</sup>) 3425, 3033, 2925, 1630, 1592, 1494, 1380, 1335, 1155, 1025, 803, 696; <sup>1</sup>H NMR (500 MHz, CDCl<sub>3</sub>, ppm) δ 7.52 (d, *J* = 7.0 Hz, 2H), 7.46 (t, *J* = 7.8 Hz, 1H), 7.40 (d, *J* = 7.7 Hz, 1H), 7.34 (dq, *J* = 14.1, 6.9 Hz, 3H), 7.23 (s, 1H), 7.14 (d, *J* = 7.7 Hz, 1H), 5.04 (s, 2H), 3.84 (s, 2H); <sup>13</sup>C{<sup>1</sup>H} NMR (126 MHz, CDCl<sub>3</sub>, ppm) δ 171.5, 155.4, 148.4, 135.7, 131.7 (q, *J* = 32.4 Hz), 129.8, 129.1, 128.6, 128.1, 124.5, 124.0 (d, *J* = 273.0 Hz), 121.3 (q, *J* = 3.8 Hz), 118.2 (q, *J* = 3.8 Hz), 46.4, 32.7; <sup>19</sup>F NMR (471 MHz, CDCl<sub>3</sub>, ppm) δ -62.64; HRMS (ESI) *m/z* [M – H]<sup>–</sup> calcd for C<sub>17</sub>H<sub>12</sub>F<sub>3</sub>N<sub>2</sub>OS 349.0628, found 349.0627.

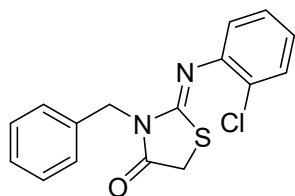

**(Z)-3-Benzyl-2-((2-chlorophenyl)imino)thiazolidin-4-one (5g).**<sup>[1]</sup> Eluent: petroleum ether/ethyl acetate (v/v = 15:1). Yellow oil: 69% yield (40.3 mg, 0.13 mmol); IR (KBr, cm<sup>-1</sup>) 3438, 3063, 2931, 1727, 1630, 1584, 1380, 1335, 1165, 1057, 754, 701; <sup>1</sup>H NMR (500 MHz, CDCl<sub>3</sub>, ppm) δ 7.58 (d, *J* = 7.1 Hz, 2H), 7.43 (d, *J* = 7.9 Hz, 1H), 7.32 (dq, *J* = 14.0, 6.9 Hz, 3H), 7.23 (t, *J* = 7.6 Hz, 1H), 7.09 (t, *J* = 7.6 Hz, 1H), 6.95 (d, *J* = 7.8 Hz, 1H), 5.07 (s, 2H), 3.83 (s, 2H); <sup>13</sup>C{<sup>1</sup>H} NMR (126 MHz, CDCl<sub>3</sub>, ppm) δ 171.6, 156.0, 145.1, 135.7, 130.2, 129.3, 128.5, 128.0, 127.5, 126.5, 125.6, 121.8, 46.4, 32.9; HRMS (ESI) *m/z* [M – H]<sup>–</sup> calcd for C<sub>16</sub>H<sub>12</sub>ClN<sub>2</sub>OS 315.0364, found 315.0366.

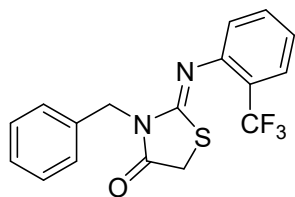

**(Z)-3-Benzyl-2-((2-(trifluoromethyl)phenyl)imino)thiazolidin-4-one (5h).**<sup>[1]</sup> Eluent: petroleum ether/ethyl acetate (v/v = 15:1). Yellow oil: 97% yield (62.8 mg, 0.18 mmol); IR (KBr, cm<sup>-1</sup>) 3439, 3036, 2937, 1731, 1634, 1380, 1317, 1166, 1032, 763, 699; <sup>1</sup>H NMR (500 MHz, CDCl<sub>3</sub>, ppm) δ 7.68 (d, *J* = 7.8 Hz, 1H), 7.53 (d, *J* = 7.1 Hz, 2H), 7.49 (t, *J* = 7.8 Hz, 1H), 7.36-7.31 (m, 3H), 7.22 (t, *J* = 7.6 Hz, 1H), 7.01 (d, *J* = 7.9 Hz, 1H), 5.04 (s, 2H), 3.83 (s, 2H); <sup>13</sup>C{<sup>1</sup>H} NMR (126 MHz, CDCl<sub>3</sub>, ppm) δ 171.6, 155.6, 146.2, 135.6, 132.7, 129.2, 128.5, 128.0, 126.9 (q, *J* = 5.1 Hz), 124.3, 123.6 (d, *J* = 316.8 Hz), 122.6 (d, *J* = 11.7 Hz), 121.4, 46.6, 32.8; <sup>19</sup>F NMR (471 MHz, CDCl<sub>3</sub>, ppm) δ -61.63; HRMS (ESI) *m/z* [M – H]<sup>–</sup> calcd for C<sub>17</sub>H<sub>12</sub>F<sub>3</sub>N<sub>2</sub>OS 349.0628, found 349.0631.

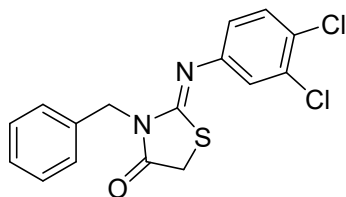

**(Z)-3-Benzyl-2-((3,4-dichlorophenyl)imino)thiazolidin-4-one (5i).** Eluent: petroleum ether/ethyl acetate (v/v = 15:1). Yellow oil: 90% yield (58.3 mg, 0.17 mmol); IR (KBr,  $\text{cm}^{-1}$ ) 3439, 3040, 2933, 1727, 1629, 1582, 1467, 1377, 1167, 1026, 817, 697;  $^1\text{H}$  NMR (500 MHz,  $\text{CDCl}_3$ , ppm)  $\delta$  7.48 (d,  $J = 6.9$  Hz, 2H), 7.39 (d,  $J = 8.5$  Hz, 1H), 7.34-7.31 (m, 3H), 7.07 (d,  $J = 1.9$  Hz, 1H), 6.81 (dd,  $J = 8.4, 2.0$  Hz, 1H), 5.00 (s, 2H), 3.84 (s, 2H);  $^{13}\text{C}\{^1\text{H}\}$  NMR (126 MHz,  $\text{CDCl}_3$ , ppm)  $\delta$  171.4, 155.6, 147.4, 135.6, 132.9, 130.9, 129.0, 128.6, 128.1, 128.1, 123.1, 120.7, 46.4, 32.8; HRMS (ESI)  $m/z$   $[\text{M} - \text{H}]^-$  calcd for  $\text{C}_{16}\text{H}_{11}\text{Cl}_2\text{N}_2\text{OS}$  348.9975, found 348.9972.

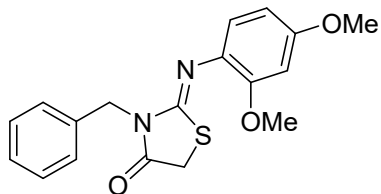

**(Z)-3-Benzyl-2-((2,4-dimethoxyphenyl)imino)thiazolidin-4-one (5j).**<sup>[1]</sup> Eluent: petroleum ether/ethyl acetate (v/v = 5:1). Yellow oil: 57% yield (36.1 mg, 0.11 mmol); IR (KBr,  $\text{cm}^{-1}$ ) 3431, 3032, 2958, 1722, 1637, 1504, 1381, 1209, 1166, 1033, 802, 701;  $^1\text{H}$  NMR (500 MHz,  $\text{CDCl}_3$ , ppm)  $\delta$  7.59 (d,  $J = 7.1$  Hz, 2H), 7.31 (dq,  $J = 14.2, 7.0$  Hz, 3H), 6.79 (d,  $J = 8.5$  Hz, 1H), 6.55 (d,  $J = 2.2$  Hz, 1H), 6.46 (dd,  $J = 8.5, 2.3$  Hz, 1H), 5.06 (s, 2H), 3.80 (d,  $J = 6.0$  Hz, 6H), 3.77 (s, 2H);  $^{13}\text{C}\{^1\text{H}\}$  NMR (126 MHz,  $\text{CDCl}_3$ , ppm)  $\delta$  171.8, 157.9, 155.1, 151.9, 136.1, 130.7, 129.2, 128.4, 127.8, 121.5, 104.2, 100.2, 55.9, 55.5, 46.3, 32.8; HRMS (ESI)  $m/z$   $[\text{M} - \text{H}]^-$  calcd for  $\text{C}_{18}\text{H}_{17}\text{N}_2\text{O}_3\text{S}$  341.0965, found 341.0964.

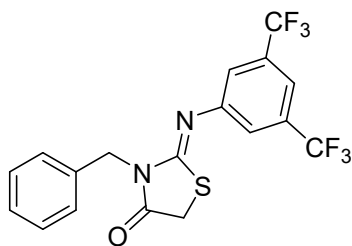

**(Z)-3-Benzyl-2-((3,5-bis(trifluoromethyl)phenyl)imino)thiazolidin-4-one (5k).**<sup>[1]</sup> Eluent: petroleum ether/ethyl acetate (v/v = 15:1). Yellow solid: 81% yield (62.6 mg, 0.15 mmol); mp 123-125  $^\circ\text{C}$ ; IR (KBr,  $\text{cm}^{-1}$ ) 3448, 3069, 3030, 2957, 1722, 1634, 1388, 1281, 1168, 1126, 979, 884, 794, 697;  $^1\text{H}$  NMR (500 MHz,  $\text{CDCl}_3$ , ppm)  $\delta$  7.64 (s, 1H), 7.49 (d,  $J = 6.8$  Hz, 2H), 7.39-7.33 (m, 5H), 5.03 (s, 2H), 3.89 (s, 2H);  $^{13}\text{C}\{^1\text{H}\}$  NMR (126 MHz,  $\text{CDCl}_3$ , ppm)  $\delta$  171.3, 156.8, 149.3, 135.4, 132.7 (q,  $J = 97.0$  Hz), 129.0, 128.7, 128.2, 123.1 (q,  $J = 260.7$  Hz), 121.7 (d,  $J = 2.9$  Hz), 118.1 (dt,  $J = 7.7, 3.8$  Hz), 46.5, 32.8;  $^{19}\text{F}$  NMR (471 MHz,  $\text{CDCl}_3$ , ppm)  $\delta$  -62.94; HRMS (ESI)  $m/z$   $[\text{M} - \text{H}]^-$  calcd for  $\text{C}_{18}\text{H}_{11}\text{F}_6\text{N}_2\text{OS}$  417.0502, found 417.0499.

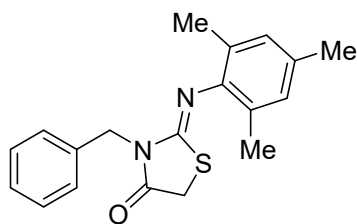

**(Z)-3-Benzyl-2-(mesitylimino)thiazolidin-4-one (5l).**<sup>[1]</sup> Eluent: petroleum ether/ethyl acetate (v/v = 15:1). Yellow oil: 55% yield (33.0 mg, 0.10 mmol); IR (KBr,  $\text{cm}^{-1}$ ) 3436, 3035, 2959, 1727, 1641, 1380, 1339, 1170, 1032, 800, 701;  $^1\text{H}$  NMR (500 MHz,  $\text{CDCl}_3$ , ppm)  $\delta$  7.53 (d,  $J = 7.0$  Hz, 2H), 7.35-7.30 (m, 3H), 6.85 (s, 2H), 5.08 (s, 2H), 3.82 (s, 2H), 2.27 (s, 3H), 1.97 (s, 6H);  $^{13}\text{C}\{^1\text{H}\}$  NMR (126 MHz,  $\text{CDCl}_3$ , ppm)  $\delta$  171.8, 153.6, 143.1, 136.0, 133.5, 129.0, 128.9, 128.4, 127.9, 127.9, 46.3, 32.9, 20.8, 17.7; HRMS (ESI)  $m/z$   $[\text{M} - \text{H}]^-$  calcd for  $\text{C}_{19}\text{H}_{19}\text{N}_2\text{OS}$  323.1224, found 323.1224.

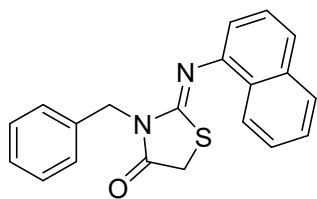

**(Z)-3-Benzyl-2-(naphthalen-1-ylimino)thiazolidin-4-one (5m).**<sup>[1]</sup> Eluent: petroleum ether/ethyl acetate (v/v = 15:1). Yellow oil: 77% yield (47.3 mg, 0.14 mmol); IR (KBr,  $\text{cm}^{-1}$ ) 3439, 3055, 2965, 1725, 1632, 1571, 1380, 1261, 1080, 1026, 804, 703;  $^1\text{H}$  NMR (500 MHz,  $\text{CDCl}_3$ , ppm)  $\delta$  7.83 (d,  $J$  = 8.1 Hz, 1H), 7.65 (d,  $J$  = 8.3 Hz, 1H), 7.61 (dd,  $J$  = 14.7, 7.8 Hz, 3H), 7.48 (t,  $J$  = 7.4 Hz, 1H), 7.44-7.34 (m, 5H), 7.02 (d,  $J$  = 7.2 Hz, 1H), 5.18 (s, 2H), 3.84 (s, 2H);  $^{13}\text{C}\{^1\text{H}\}$  NMR (126 MHz,  $\text{CDCl}_3$ , ppm)  $\delta$  171.8, 154.4, 144.4, 136.0, 134.4, 129.1, 128.6, 128.0, 127.9, 127.4, 126.4, 125.7, 125.6, 124.8, 123.4, 115.0, 46.6, 32.8; HRMS (ESI)  $m/z$   $[\text{M} - \text{H}]^-$  calcd for  $\text{C}_{20}\text{H}_{15}\text{N}_2\text{OS}$  331.0911, found 331.0913.

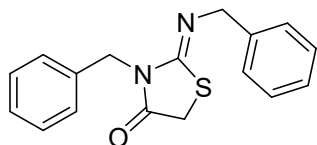

**(Z)-3-Benzyl-2-(benzylimino)thiazolidin-4-one (5n).**<sup>[1]</sup> Eluent: petroleum ether/ethyl acetate (v/v = 15:1). Yellow solid: 70% yield (38.3 mg, 0.13 mmol); mp 67-69 °C; IR (KBr,  $\text{cm}^{-1}$ ) 3341, 3066, 3027, 2960, 2927, 1715, 1646, 1495, 1422, 1377, 1328, 1261, 1157, 1027, 801, 704;  $^1\text{H}$  NMR (500 MHz,  $\text{CDCl}_3$ , ppm)  $\delta$  7.47 (d,  $J$  = 6.5 Hz, 2H), 7.35-7.27 (m, 8H), 4.97 (s, 2H), 4.54 (s, 2H), 3.85 (s, 2H);  $^{13}\text{C}\{^1\text{H}\}$  NMR (126 MHz,  $\text{CDCl}_3$ , ppm)  $\delta$  171.5, 152.7, 139.3, 136.3, 129.0, 128.4, 128.4, 127.8, 127.4, 126.9, 55.4, 46.2, 32.7; HRMS (ESI)  $m/z$   $[\text{M} - \text{H}]^-$  calcd for  $\text{C}_{17}\text{H}_{15}\text{N}_2\text{OS}$  295.0911, found 295.0909.

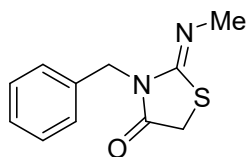

**(Z)-3-Benzyl-2-(methylimino)thiazolidin-4-one (5o).**<sup>[1]</sup> Eluent: petroleum ether/ethyl acetate (v/v = 10:1). Yellow solid: 70% yield (28.5 mg, 0.13 mmol); mp 157-159 °C; IR (KBr,  $\text{cm}^{-1}$ ) 3335, 3081, 3019, 2973, 2938, 1720, 1639, 1409, 1375, 1293, 1112, 1033, 790, 734;  $^1\text{H}$  NMR (500 MHz,  $\text{CDCl}_3$ , ppm)  $\delta$  7.36-7.33 (m, 4H), 7.28-7.26 (m, 1H), 4.52 (s, 2H), 3.84 (s, 2H), 3.23 (s, 3H);  $^{13}\text{C}\{^1\text{H}\}$  NMR (126 MHz,  $\text{CDCl}_3$ , ppm)  $\delta$  171.6, 153.7, 139.2, 128.5, 127.6, 127.0, 55.5, 32.8, 29.6; HRMS (ESI)  $m/z$   $[\text{M} - \text{H}]^-$  calcd for  $\text{C}_{11}\text{H}_{11}\text{N}_2\text{OS}$  219.0598, found 219.0599.

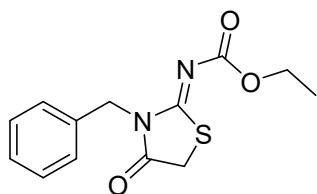

**Ethyl (Z)-3-benzyl-4-oxothiazolidin-2-ylidene)carbamate (5p).**<sup>[1]</sup> Eluent: petroleum ether/ethyl acetate (v/v = 5:1). Yellow solid: 42% yield (21.6 mg, 0.08 mmol); mp 140-142 °C; IR (KBr,  $\text{cm}^{-1}$ ) 3473, 3072, 3041, 2963, 2940, 1743, 1674, 1541, 1379, 1261, 1168, 1019, 799, 731;  $^1\text{H}$  NMR (500 MHz,  $\text{CDCl}_3$ , ppm)  $\delta$  7.44 (d,  $J$  = 6.6 Hz, 2H), 7.32-7.28 (m, 3H), 5.02 (s, 2H), 4.28 (q,  $J$  = 7.1 Hz, 2H), 3.78 (s, 2H), 1.37 (t,  $J$  = 7.1 Hz, 3H);  $^{13}\text{C}\{^1\text{H}\}$  NMR (126 MHz,  $\text{CDCl}_3$ , ppm)  $\delta$  173.5, 172.7, 162.3, 135.1, 129.0, 128.6, 128.2, 62.8, 47.0, 32.8, 14.3; HRMS (ESI)  $m/z$   $[\text{M} - \text{H}]^-$  calcd for  $\text{C}_{13}\text{H}_{13}\text{N}_2\text{O}_3\text{S}$  277.0652, found 277.0650.

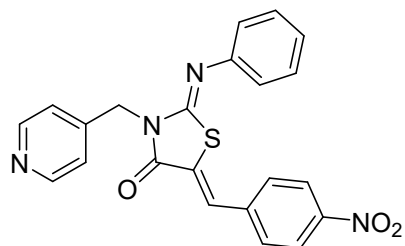

**(Z)-5-((Z)-4-Nitrobenzylidene)-2-(phenylimino)-3-(pyridin-4-ylmethyl)thiazolidin-4-one (7).**<sup>[2]</sup> Eluent: petroleum ether/ethyl acetate (v/v = 2:1). Orange solid: 40% yield (30.7 mg, 0.07 mmol); mp 142-144 °C; IR (KBr, cm<sup>-1</sup>) 3450, 3036, 2960, 2922, 1644, 1591, 1455, 1379, 1338, 1262, 1018, 801, 709; <sup>1</sup>H NMR (400 MHz, CDCl<sub>3</sub>, ppm) δ 8.63 (s, 2H), 8.26 (d, *J* = 8.4 Hz, 2H), 7.80 (s, 1H), 7.59 (d, *J* = 8.3 Hz, 2H), 7.40 (d, *J* = 7.4 Hz, 4H), 7.23 (d, *J* = 7.3 Hz, 1H), 6.96 (d, *J* = 7.7 Hz, 2H), 5.19 (s, 2H); <sup>13</sup>C{<sup>1</sup>H} NMR (100 MHz, CDCl<sub>3</sub>, ppm) δ 165.9, 150.2, 148.4, 147.7, 147.2, 144.3, 139.6, 130.4, 129.6, 128.5, 125.9, 125.6, 124.3, 123.4, 120.9, 45.5; HRMS (ESI) *m/z* [M + H]<sup>+</sup> calcd for C<sub>22</sub>H<sub>17</sub>N<sub>4</sub>O<sub>3</sub>S 417.1016, found 417.1013.

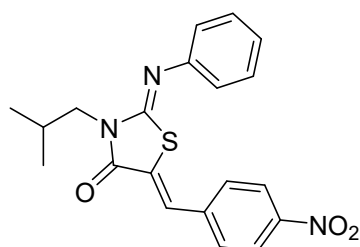

**(Z)-3-Isobutyl-5-((Z)-4-nitrobenzylidene)-2-(phenylimino)thiazolidin-4-one (8).**<sup>[3]</sup> Eluent: petroleum ether/ethyl acetate (v/v = 20:1). Yellow solid: 61% yield (43.0 mg, 0.11 mmol); mp 116-118 °C; IR (KBr, cm<sup>-1</sup>) 3438, 3032, 2961, 2940, 1705, 1644, 1592, 1381, 1342, 1126, 848, 767, 696; <sup>1</sup>H NMR (400 MHz, CDCl<sub>3</sub>, ppm) δ 8.24 (d, *J* = 8.5 Hz, 2H), 7.75 (s, 1H), 7.59 (d, *J* = 8.5 Hz, 2H), 7.41 (t, *J* = 7.6 Hz, 2H), 7.22 (t, *J* = 7.4 Hz, 1H), 6.99 (d, *J* = 7.6 Hz, 2H), 3.86 (d, *J* = 7.4 Hz, 2H), 2.35 (td, *J* = 13.6, 6.9 Hz, 1H), 1.01 (d, *J* = 6.6 Hz, 6H); <sup>13</sup>C{<sup>1</sup>H} NMR (100 MHz, CDCl<sub>3</sub>, ppm) δ 166.5, 149.4, 147.9, 147.5, 140.0, 130.3, 129.5, 127.4, 126.6, 125.2, 124.2, 121.0, 50.6, 27.0, 20.1; HRMS (ESI) *m/z* [M + H]<sup>+</sup> calcd for C<sub>20</sub>H<sub>20</sub>N<sub>3</sub>O<sub>3</sub>S 382.1220, found 382.1217.

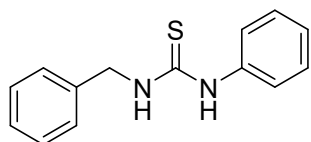

**1-Benzyl-3-phenylthiourea (9).**<sup>[4]</sup> Eluent: petroleum ether/ethyl acetate (v/v = 5:1). White solid; mp 152-154 °C; IR (KBr, cm<sup>-1</sup>) 3363, 3149, 2972, 2921, 1538, 1504, 1294, 1242, 1065, 970, 741, 693; <sup>1</sup>H NMR (500 MHz, DMSO-*d*<sub>6</sub>, ppm) δ 9.63 (s, 1H), 8.17 (s, 1H), 7.43 (d, *J* = 7.8 Hz, 2H), 7.33 (dd, *J* = 11.2, 6.3 Hz, 6H), 7.26 (td, *J* = 8.5, 4.2 Hz, 1H), 7.12 (t, *J* = 7.3 Hz, 1H), 4.75 (s, 2H); <sup>13</sup>C{<sup>1</sup>H} NMR (126 MHz, DMSO-*d*<sub>6</sub>, ppm) δ 181.3, 139.6, 139.5, 129.1, 128.8, 127.9, 127.4, 124.8, 123.8, 47.7.

## References

- [1] W. Guo, M. Zhao, W. Tan, L. Zheng, K. Tao, L. Liu, X. Wang, D. Chen and X. Fan, *J. Org. Chem.*, 2018, **83**, 1402–1413.
- [2] M. F. Ansari, D. Idrees, M. I. Hassan, K. Ahmad, F. Avcilla and A. Azam, *Eur. J. Med. Chem.*, 2018, **144**, 544–556.
- [3] M. Mushtaque, F. Avcilla and A. Azam, *Eur. J. Med. Chem.*, 2012, **55**, 439–448.
- [4] (a) L. C. de Sequeira Aguiar, G. M. Viana, M. V. dos Santos Romualdo, M. V. Costa and B. S. Bonato. *Lett. Org. Chem.*, 2011, **8**, 540–544; (b) T. Bade and R. R. Vedula, *J. Heterocyclic Chem.*, 2015, **52**, 1883–1886; (c) N. Tumula, N. Jatangi, R. K. Palakodety, S. Balasubramanian and M. Nakka, *J. Org. Chem.*, 2017, **82**, 5310–5316; (d) J.-J. Chu, B.-L. Hu, Z.-Y. Liao

and X.-G. Zhang, *J. Org. Chem.*, 2016, **81**, 8647–8652; (e) S. Wangngae, M. Pattarawarapan and W. Phakhodee, *J. Org. Chem.*, 2017, **82**, 10331–10340.

## NMR Spectra

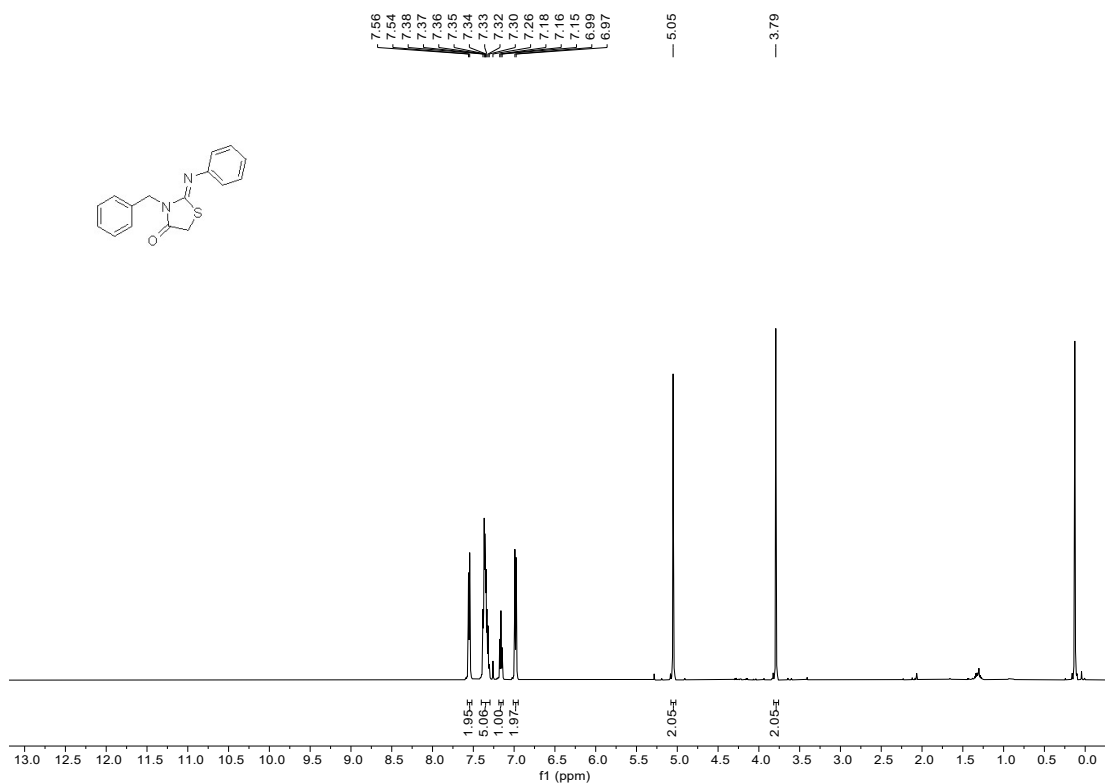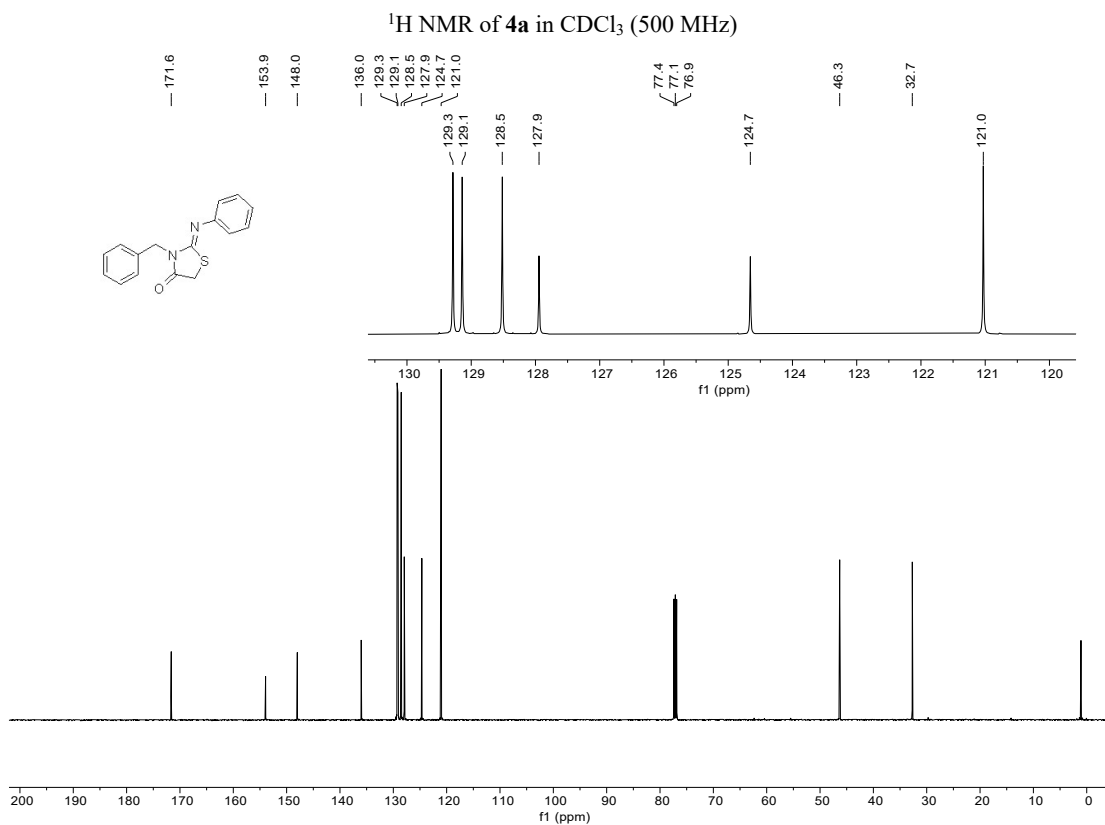

<sup>13</sup>C{<sup>1</sup>H} NMR of **4a** in CDCl<sub>3</sub> (126 MHz)



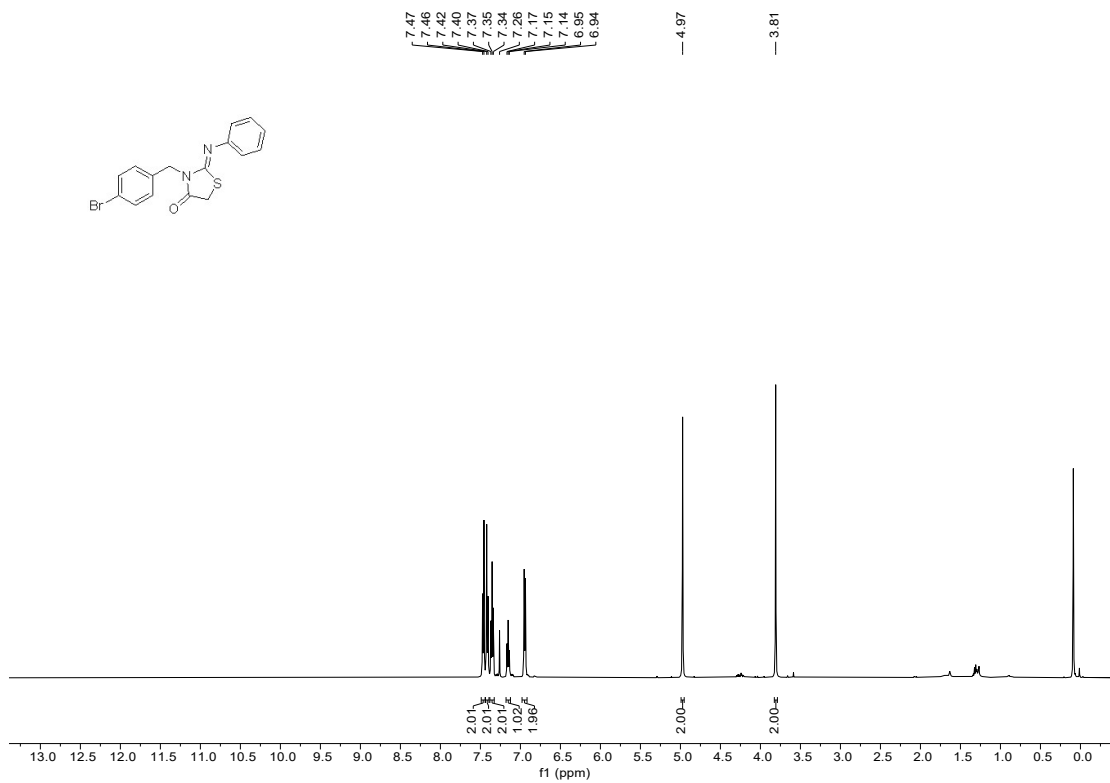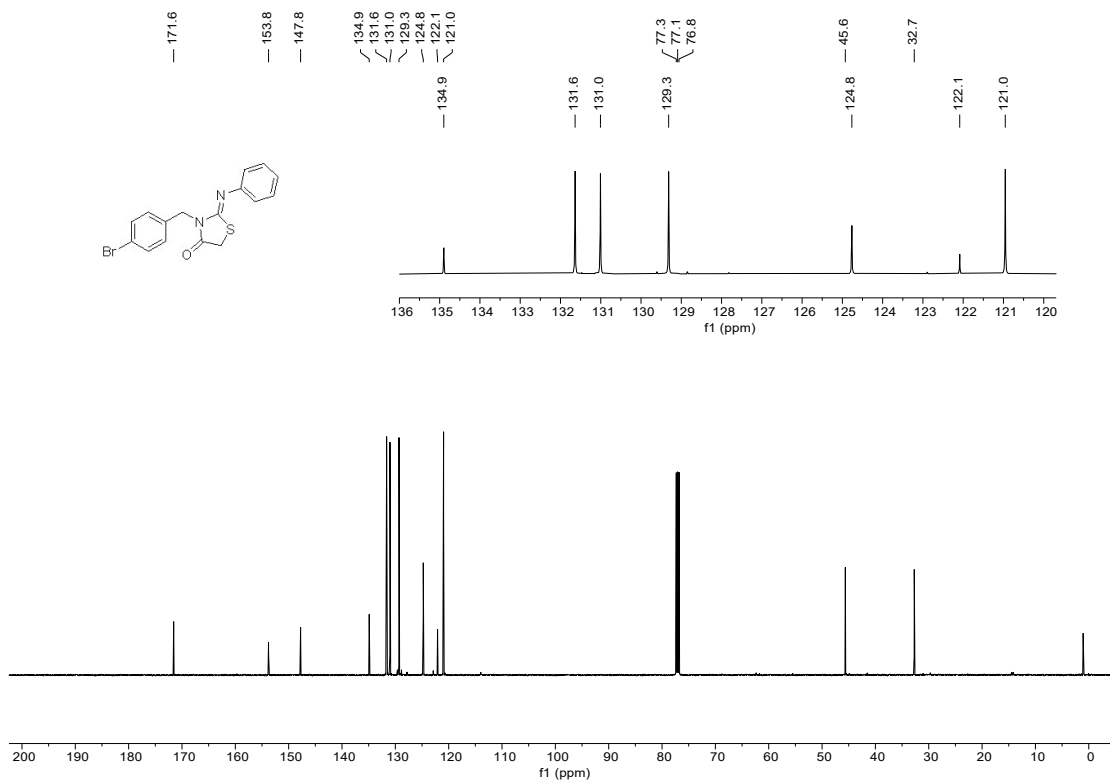

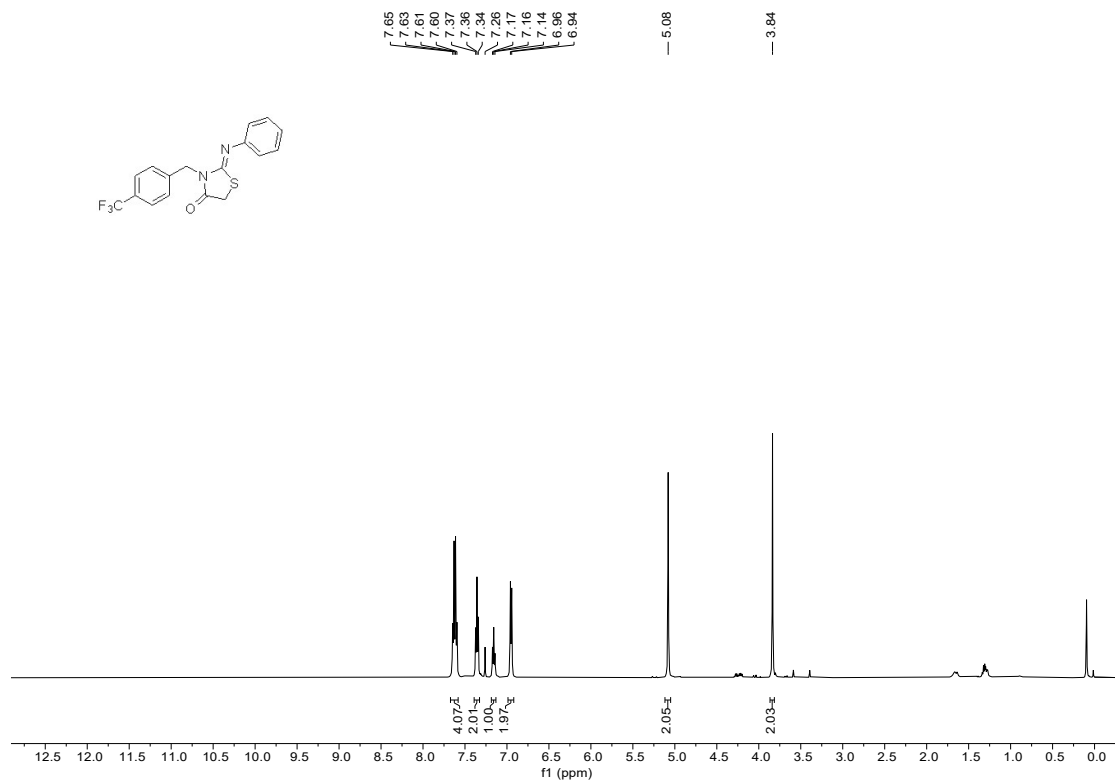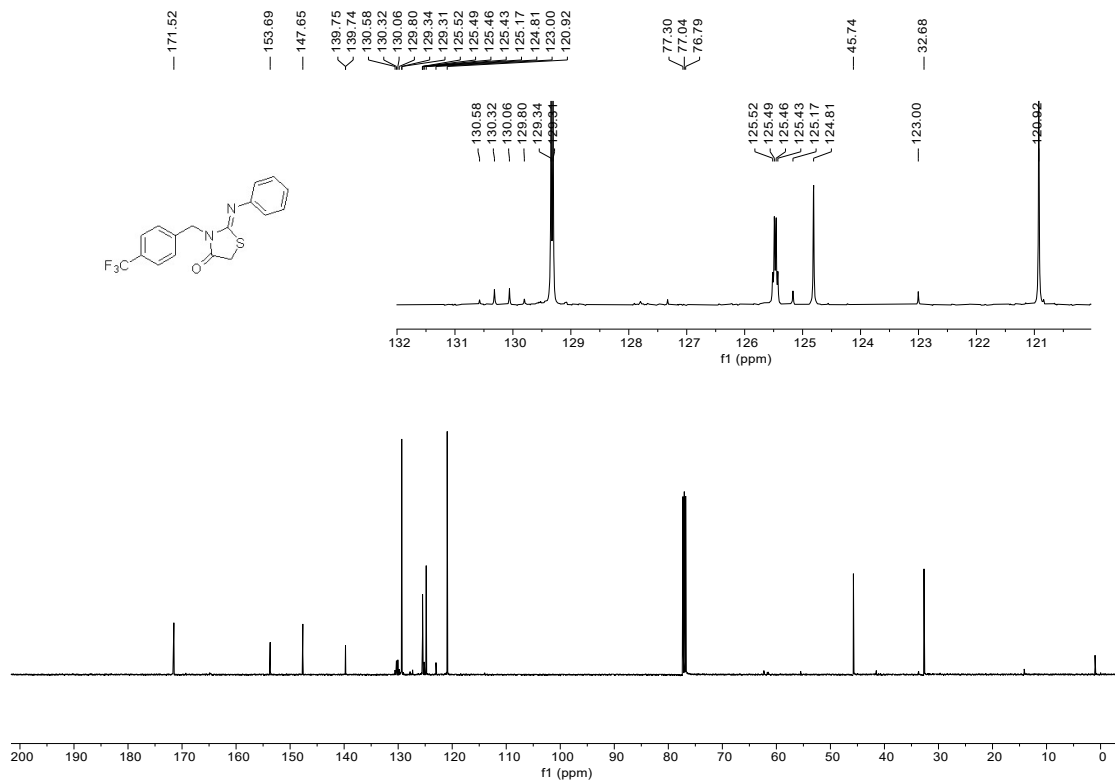

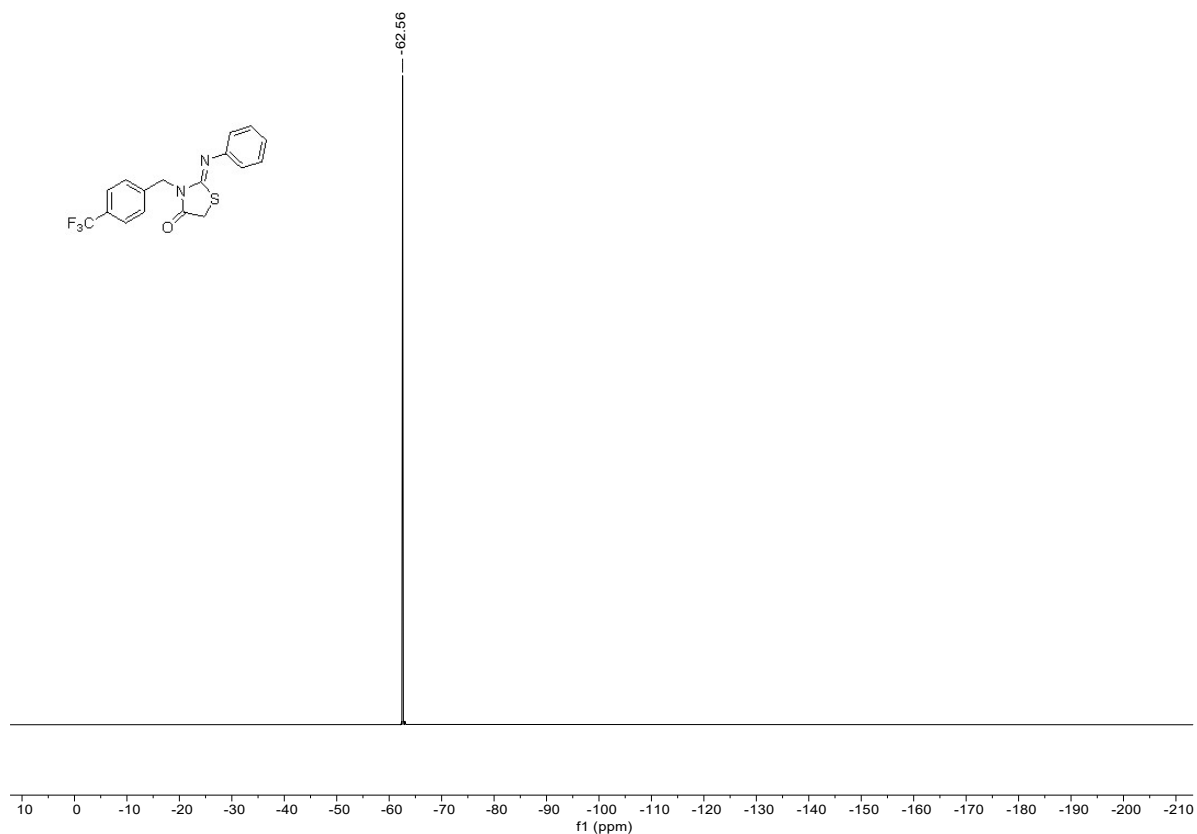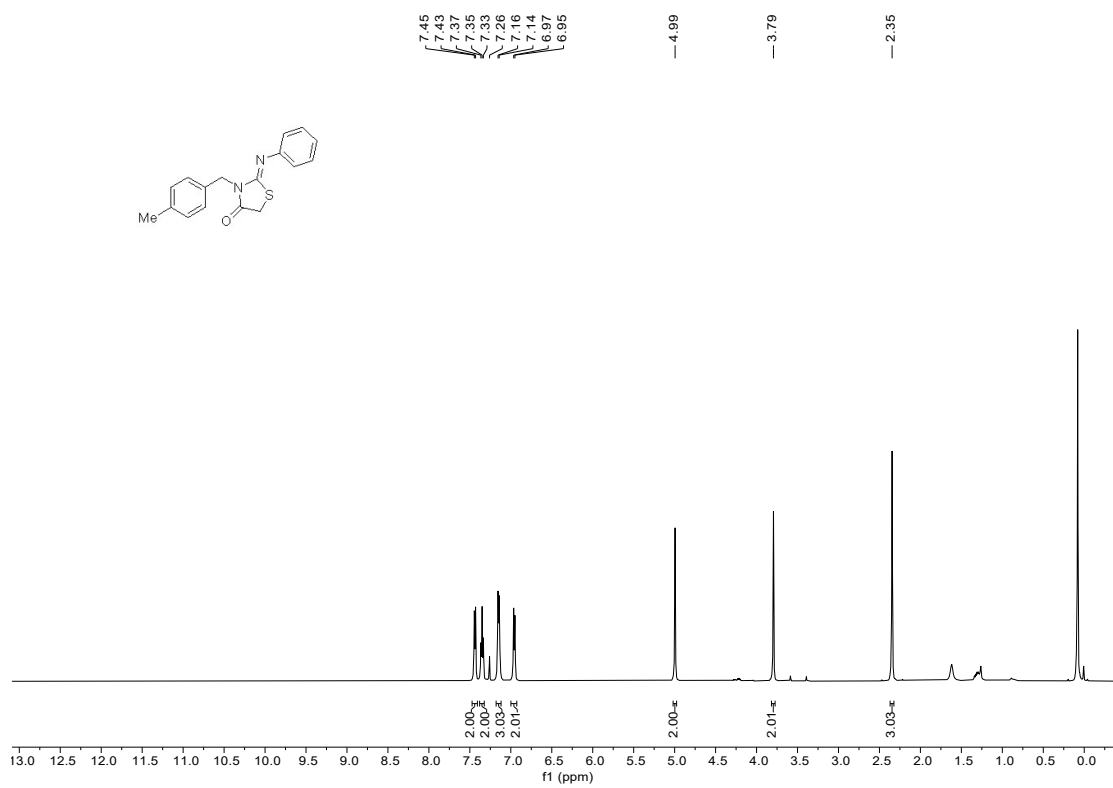

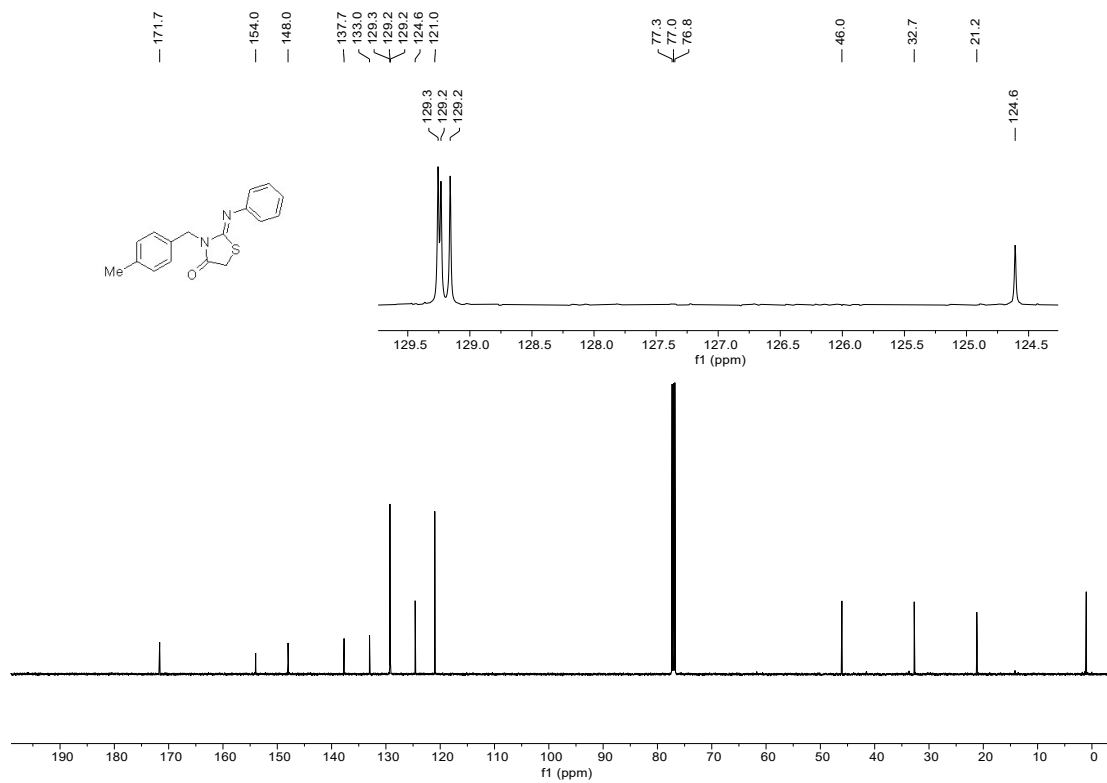

$^{13}\text{C}\{^1\text{H}\}$  NMR of **4d** in  $\text{CDCl}_3$  (126 MHz)

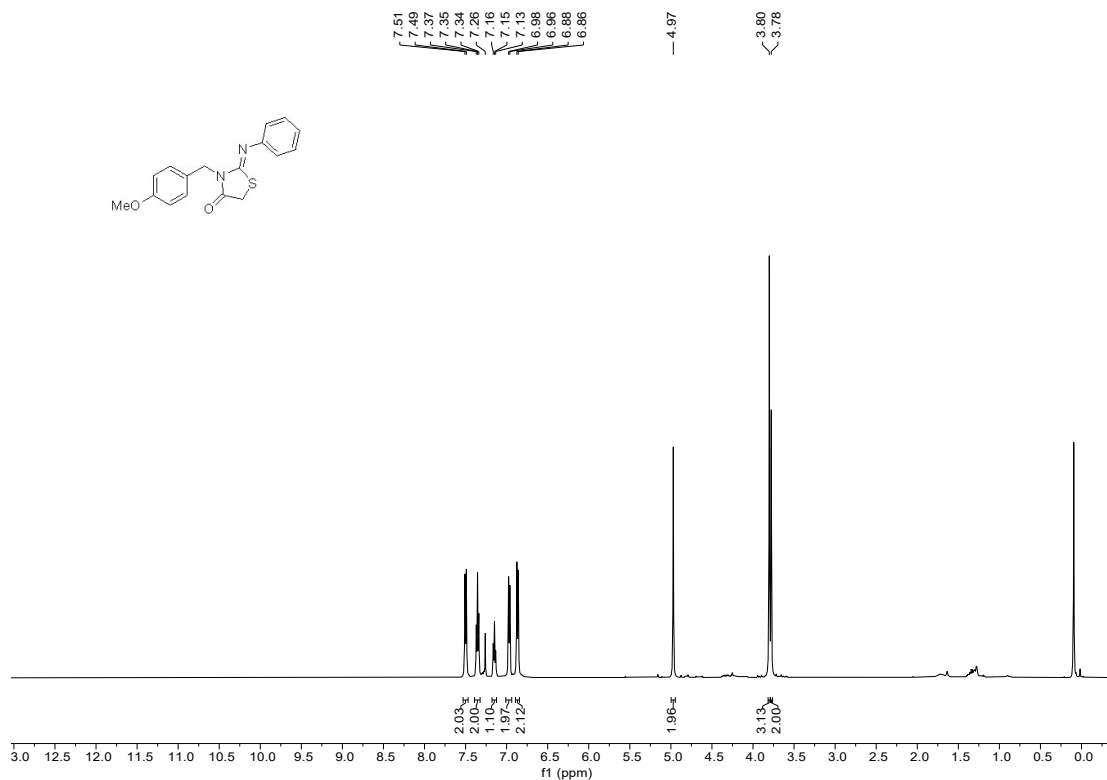

$^1\text{H}$  NMR of **4e** in  $\text{CDCl}_3$  (500 MHz)

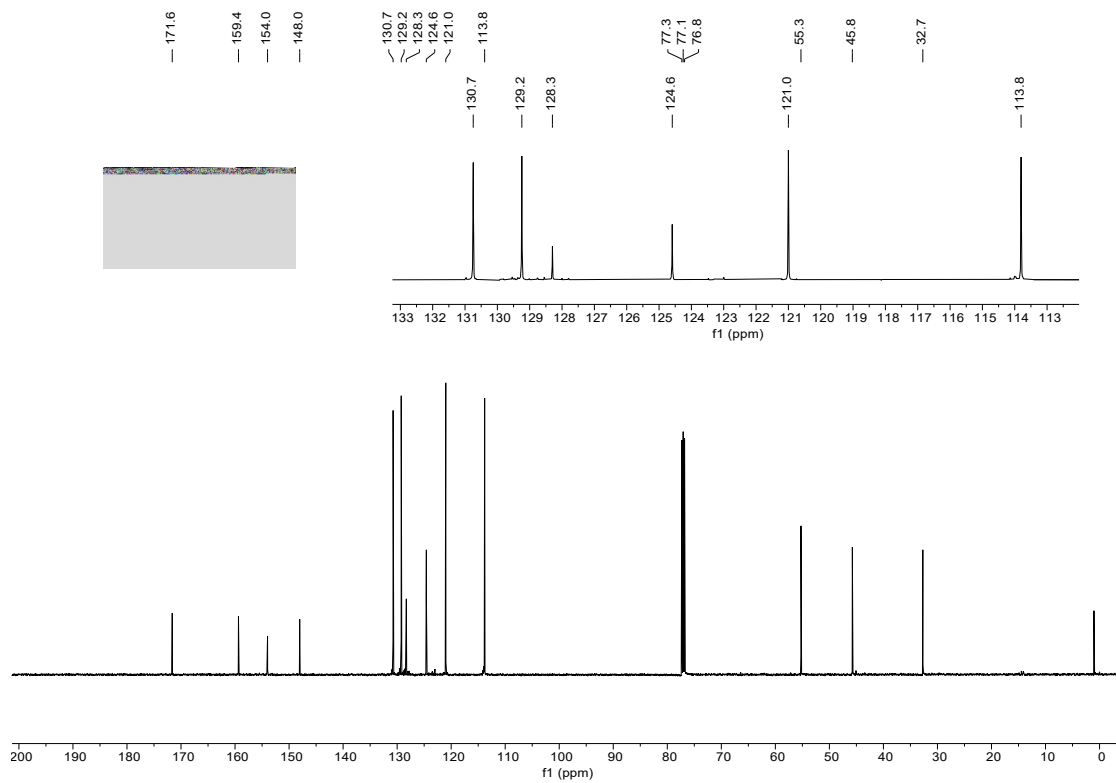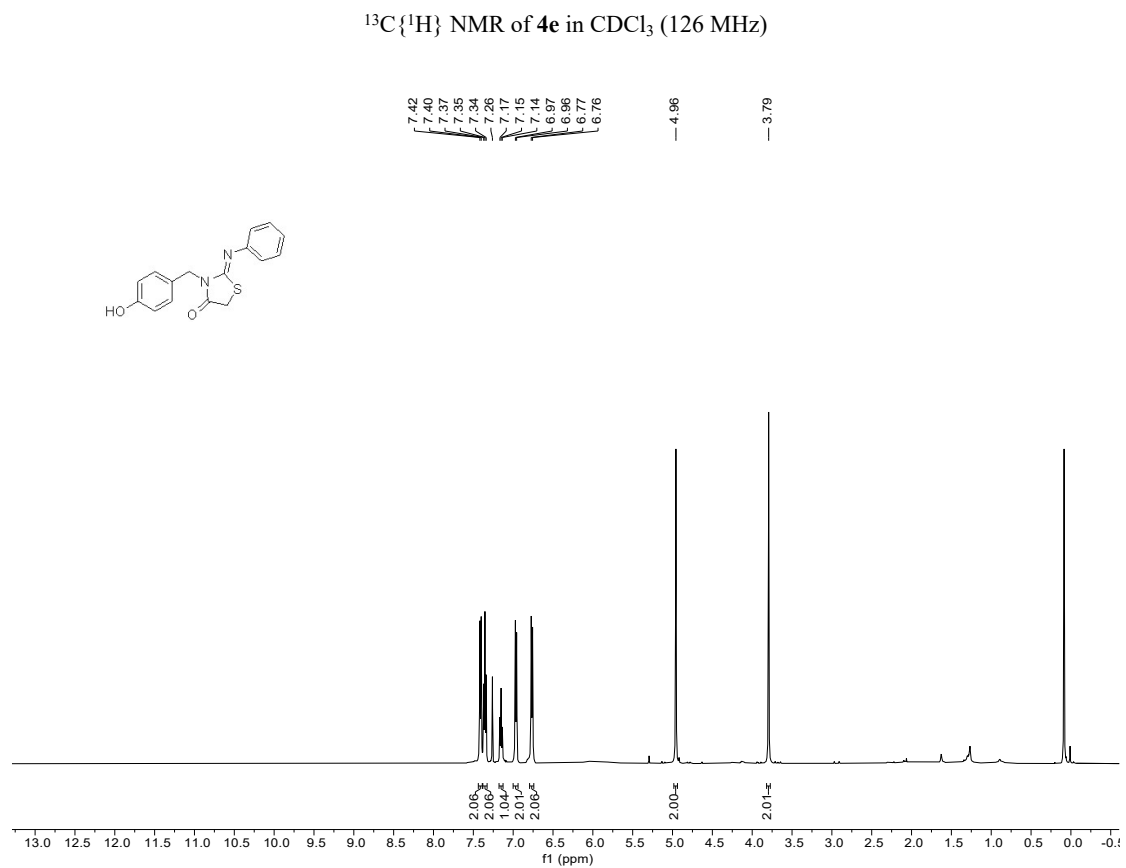

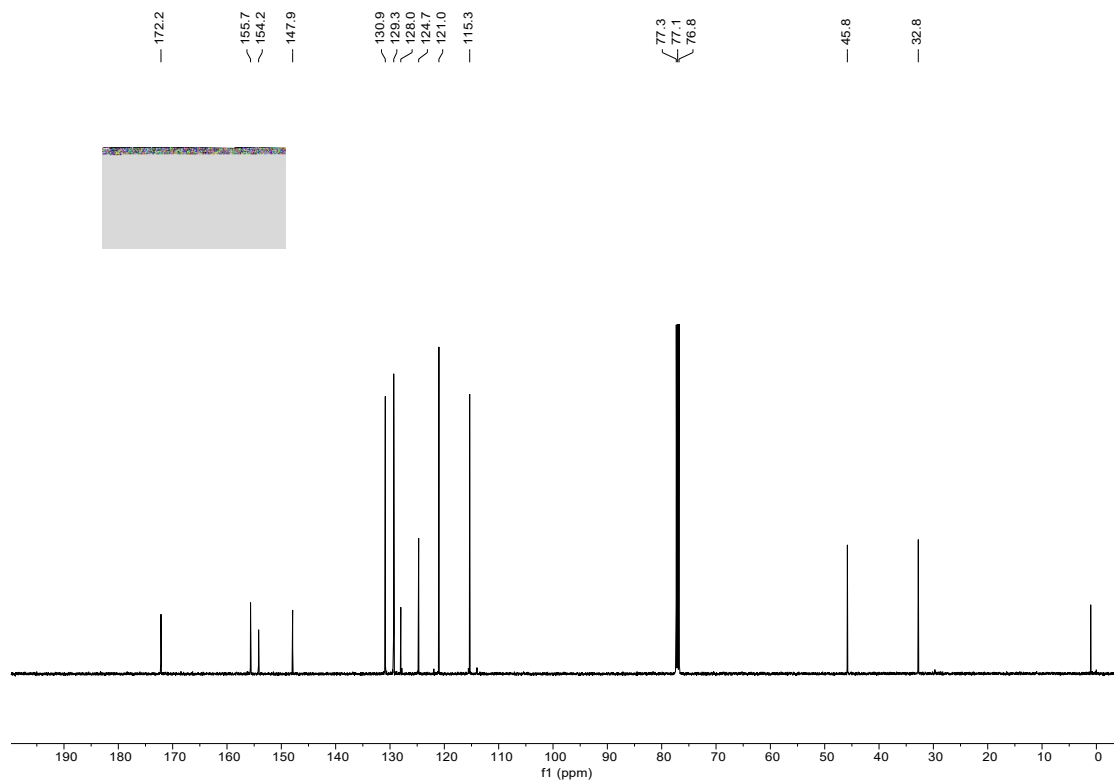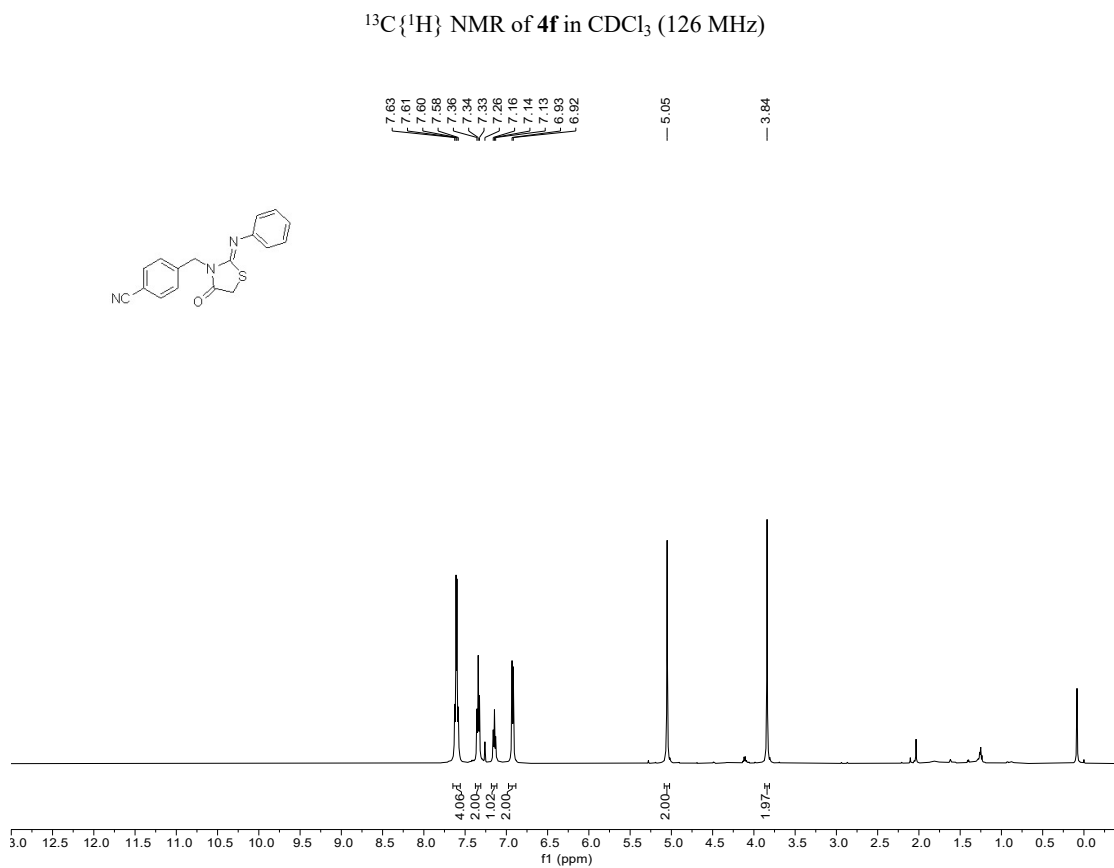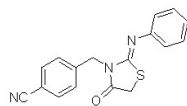

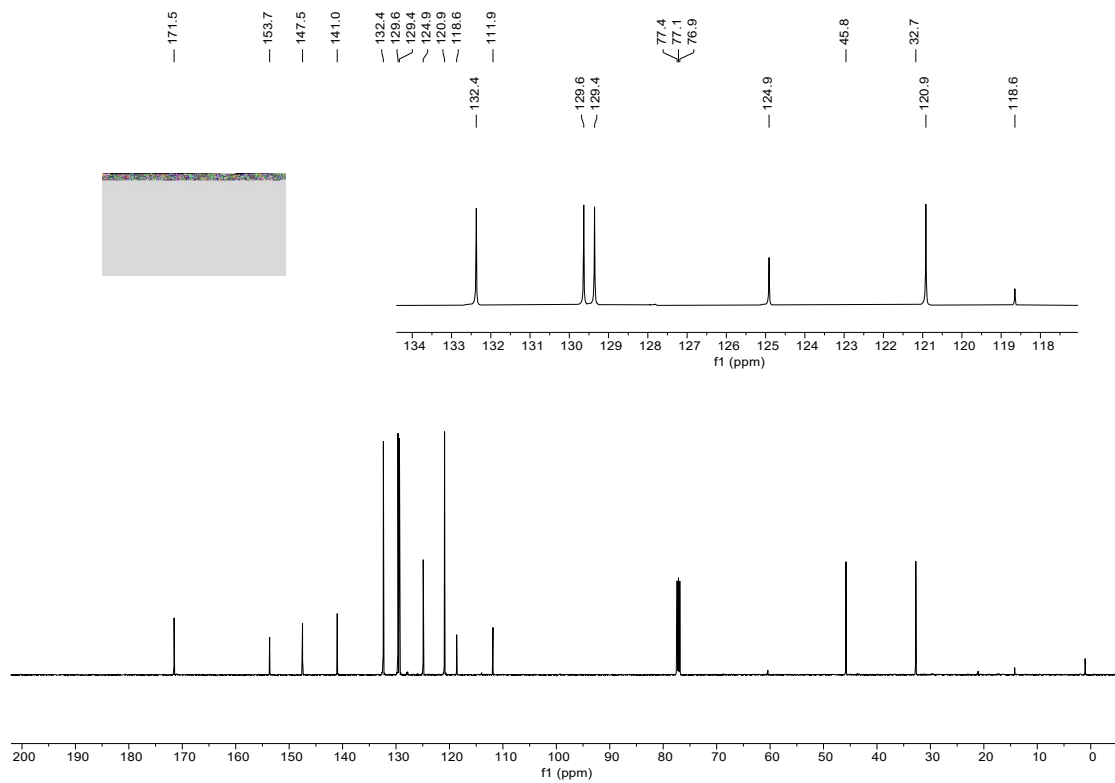

<sup>13</sup>C{<sup>1</sup>H} NMR of **4g** in CDCl<sub>3</sub> (126 MHz)

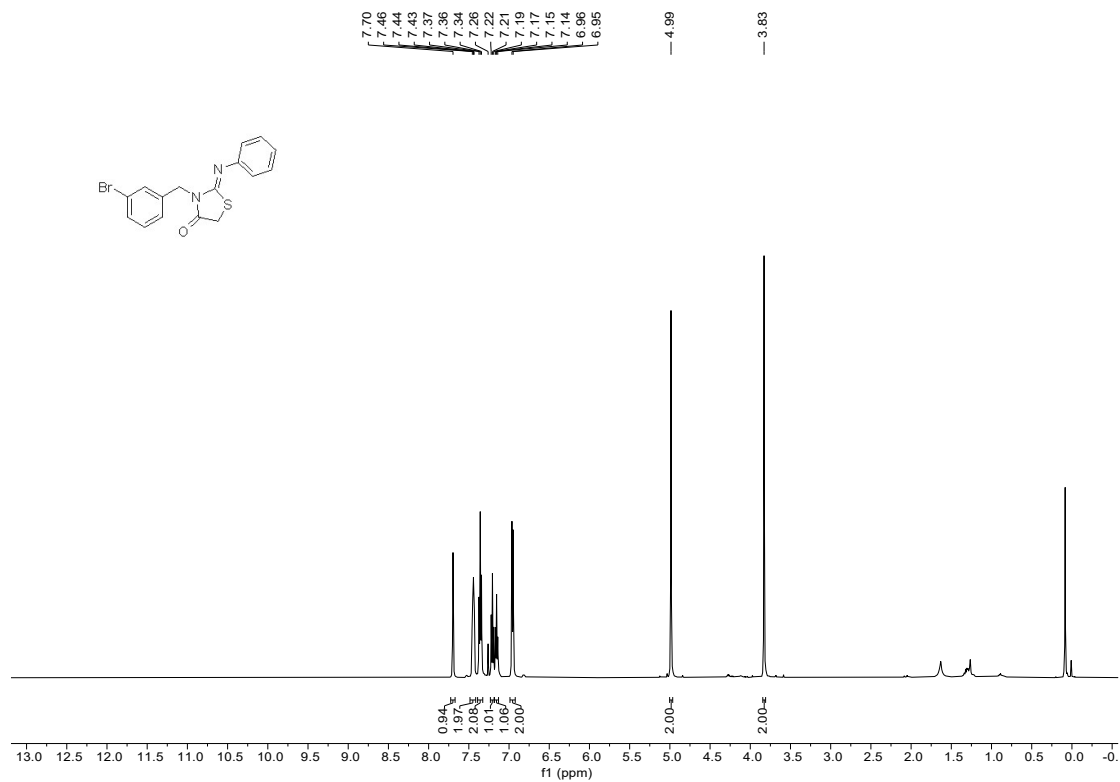

<sup>1</sup>H NMR of **4h** in CDCl<sub>3</sub> (500 MHz)



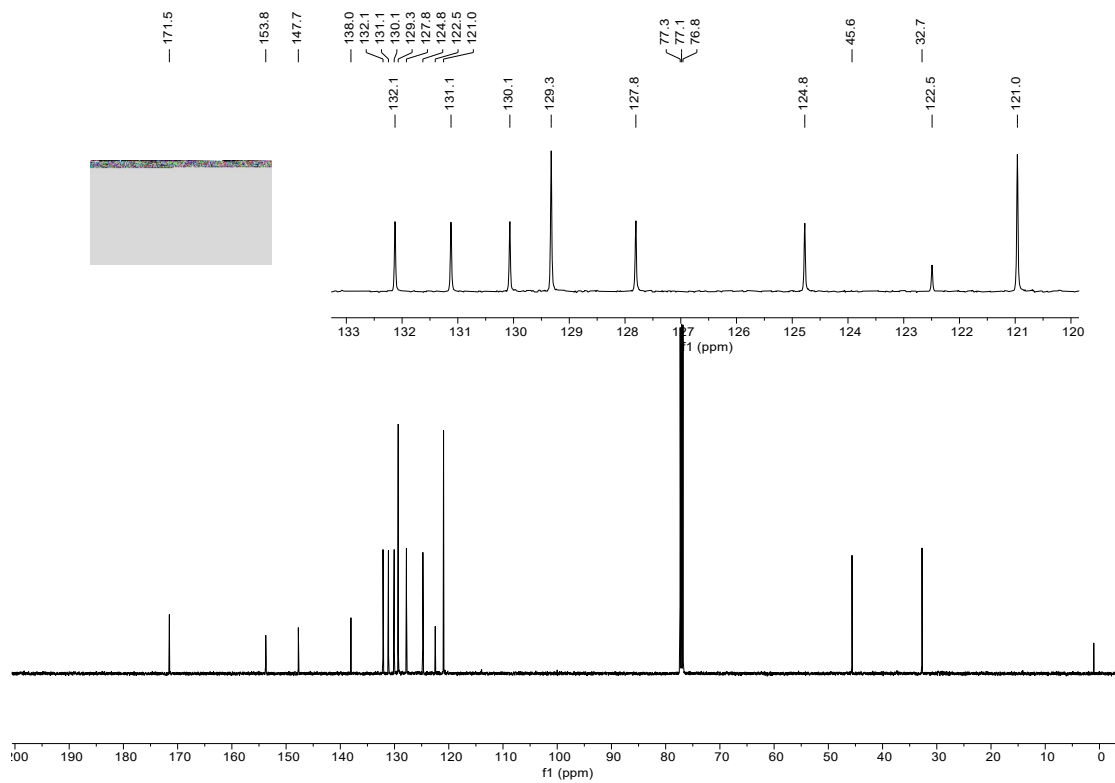

$^{13}\text{C}\{^1\text{H}\}$  NMR of **4h** in  $\text{CDCl}_3$  (126 MHz)

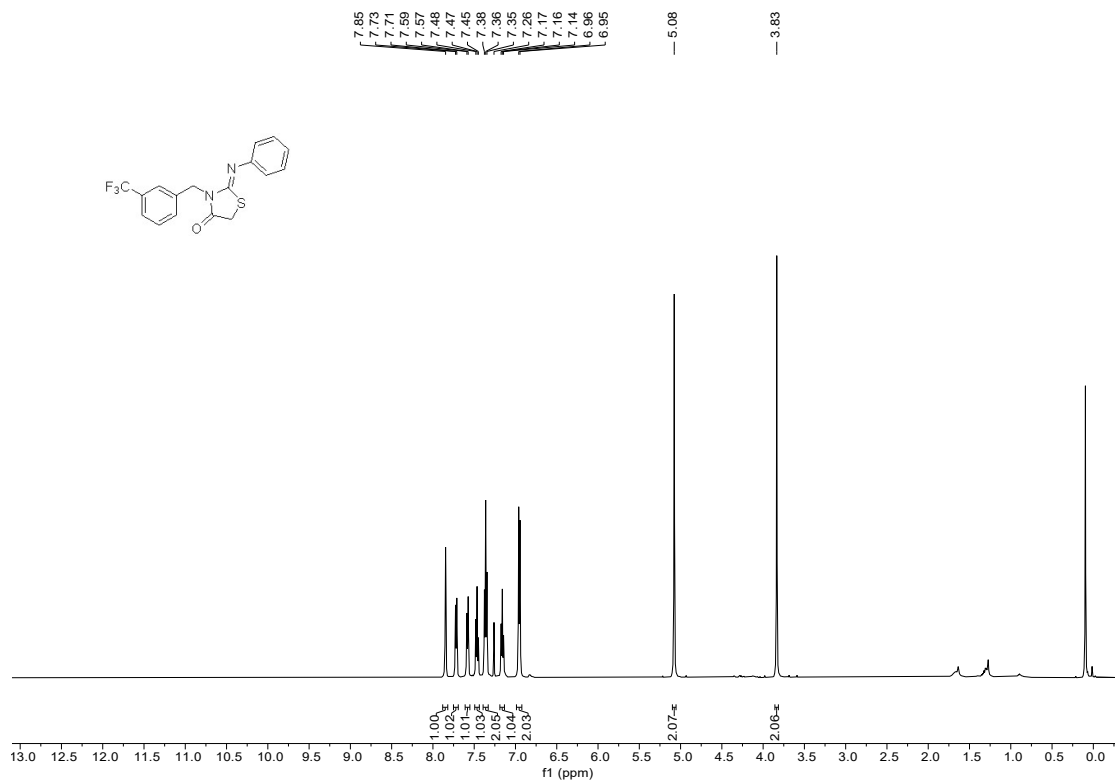

$^1\text{H}$  NMR of **4i** in  $\text{CDCl}_3$  (500 MHz)

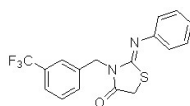

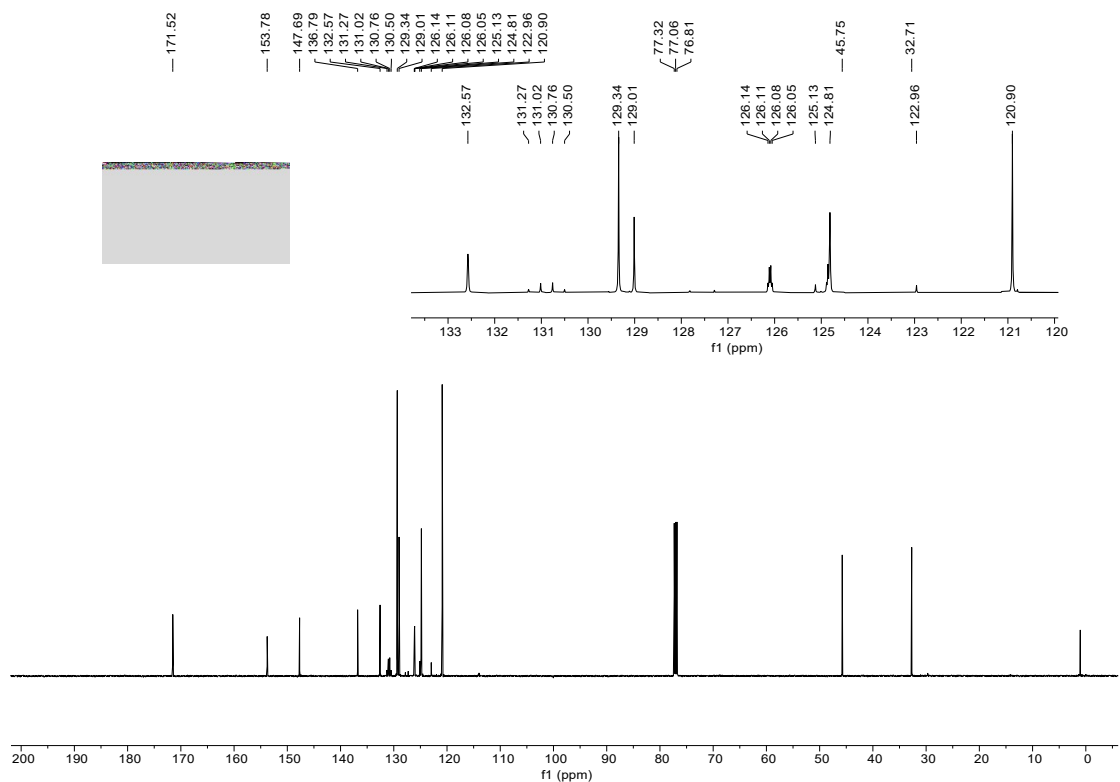

$^{13}\text{C}\{^1\text{H}\}$  NMR of **4i** in  $\text{CDCl}_3$  (126 MHz)

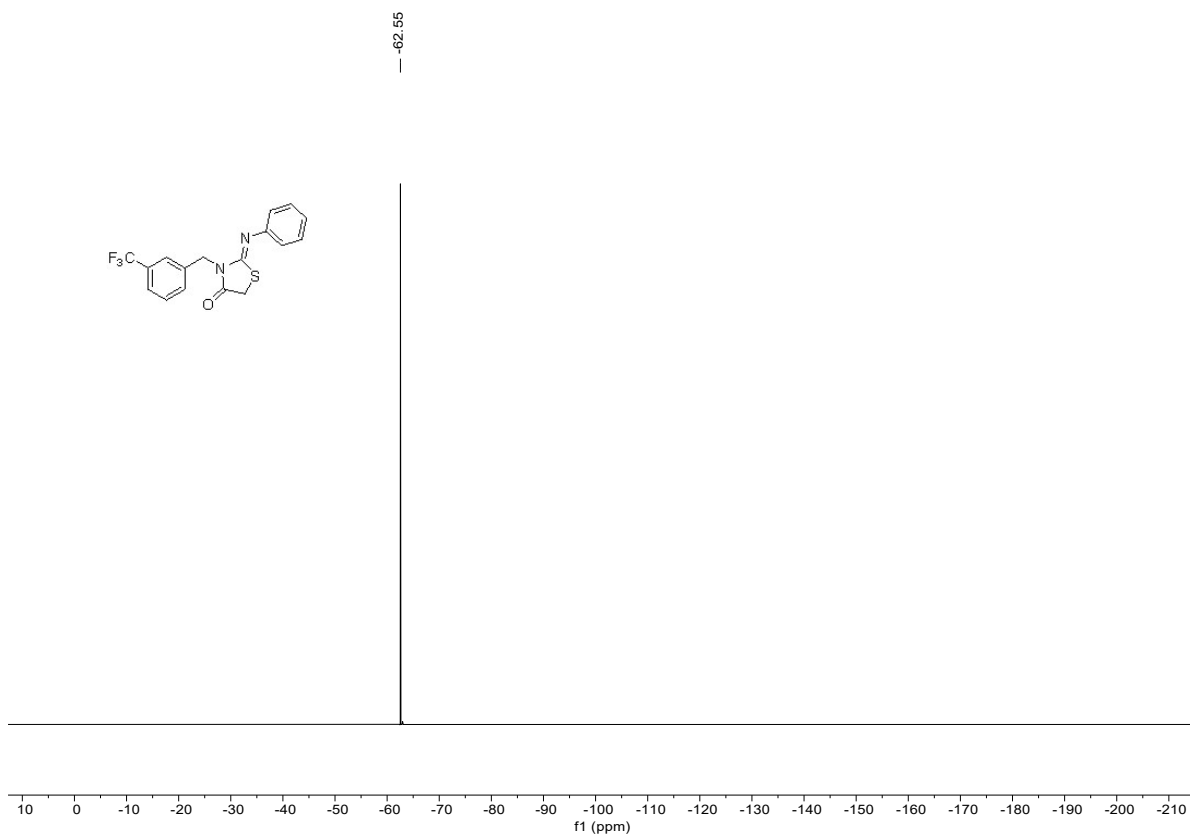

$^{19}\text{F}$  NMR of **4i** in  $\text{CDCl}_3$  (471 MHz)

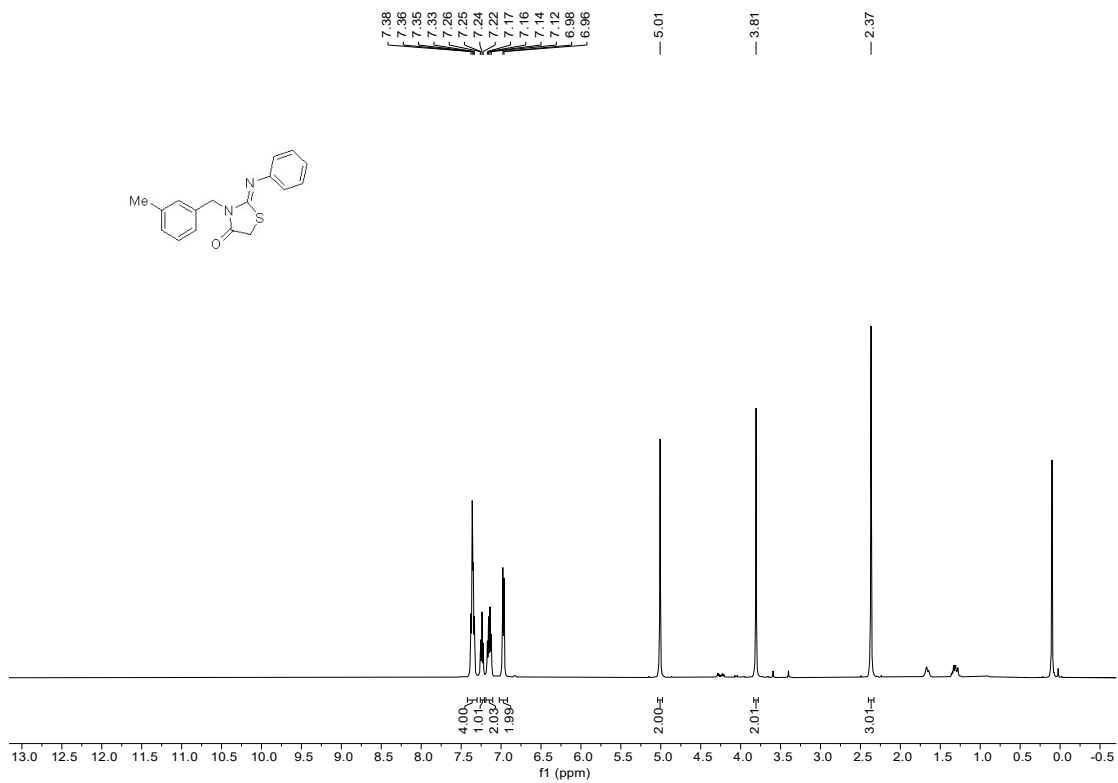

$^1\text{H}$  NMR of **4j** in  $\text{CDCl}_3$  (500 MHz)

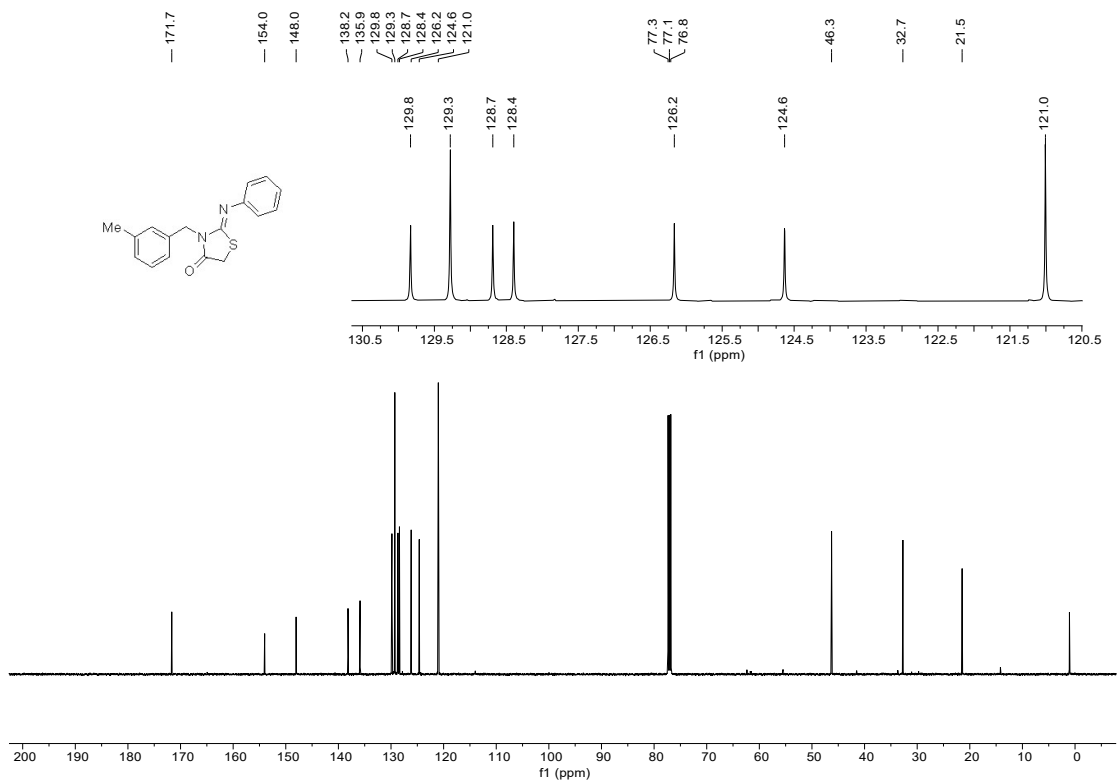

$^{13}\text{C}\{^1\text{H}\}$  NMR of **4j** in  $\text{CDCl}_3$  (126 MHz)

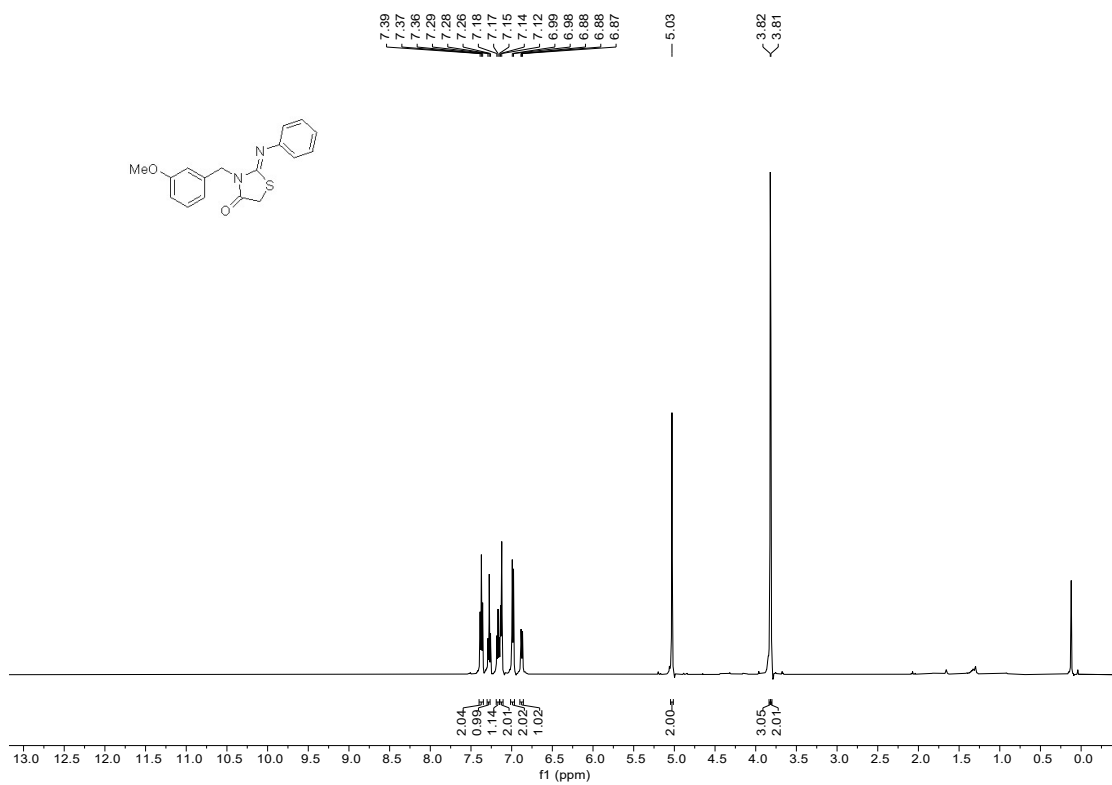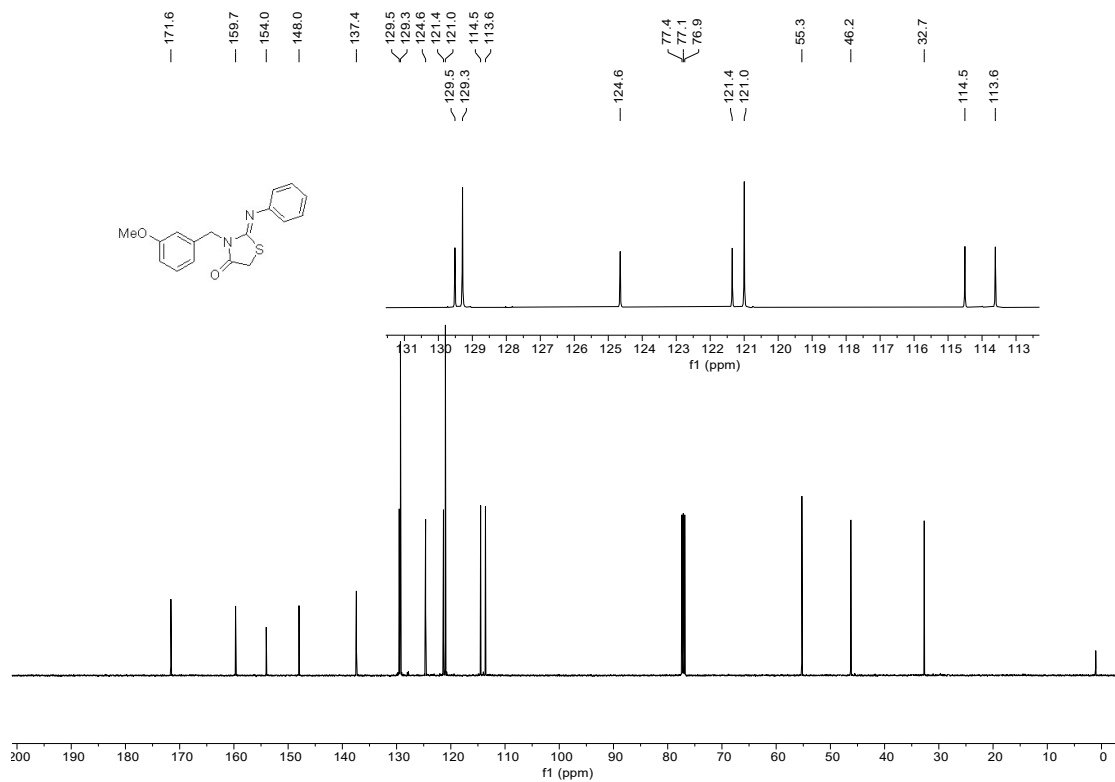

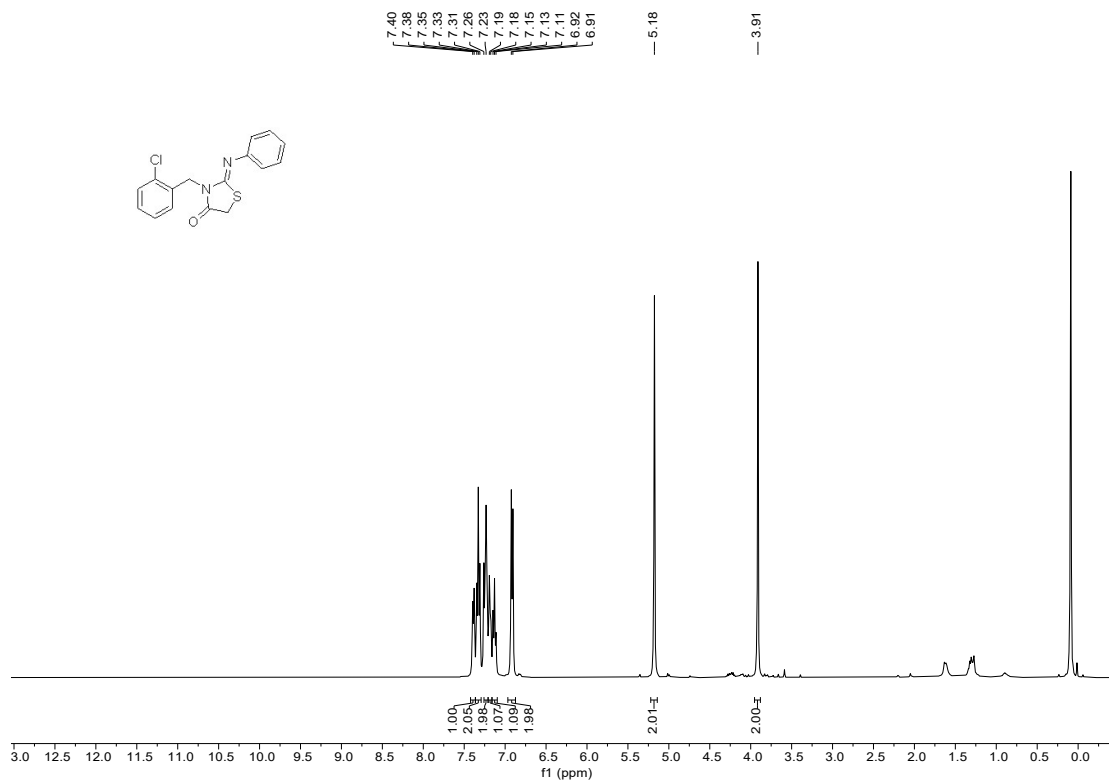

<sup>1</sup>H NMR of **4I** in CDCl<sub>3</sub> (500 MHz)

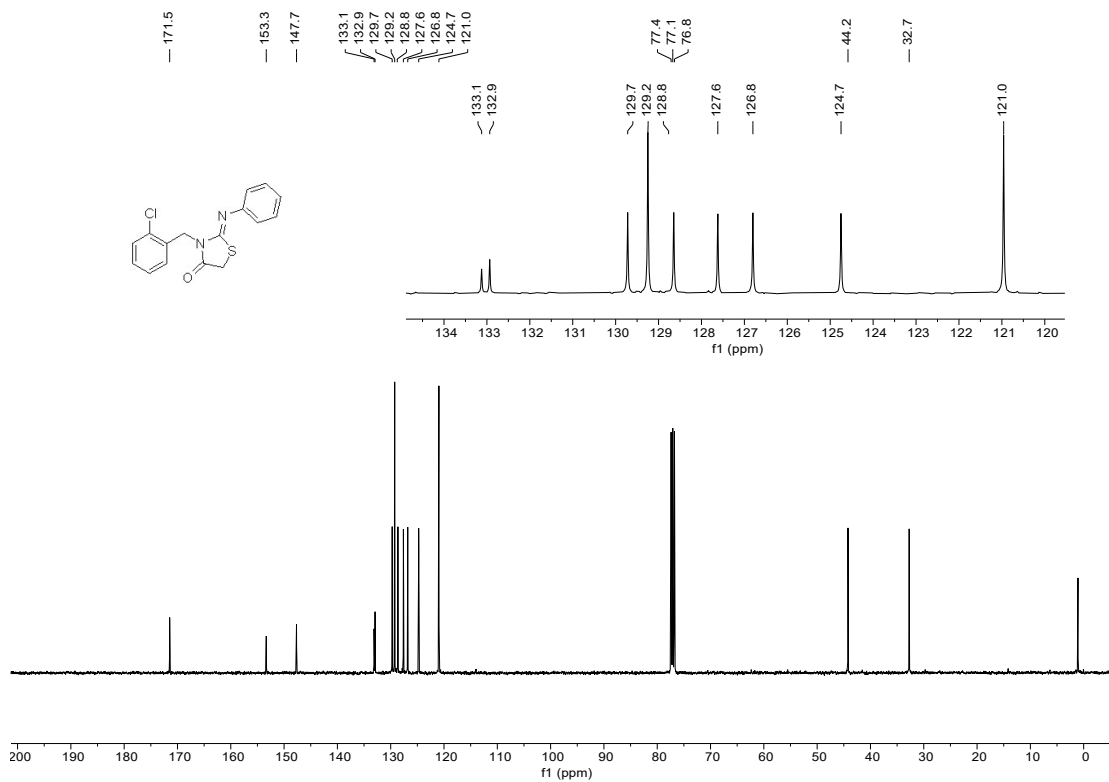

<sup>13</sup>C{<sup>1</sup>H} NMR of **4I** in CDCl<sub>3</sub> (126 MHz)

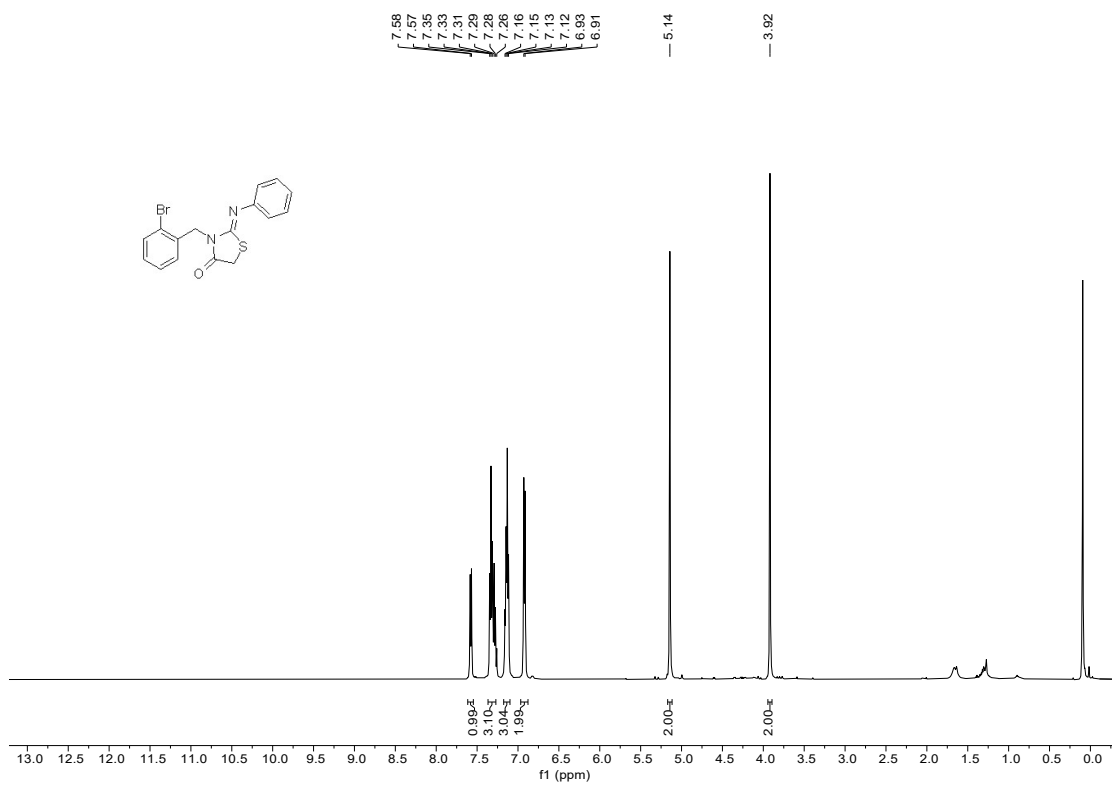

<sup>1</sup>H NMR of **4m** in CDCl<sub>3</sub> (500 MHz)

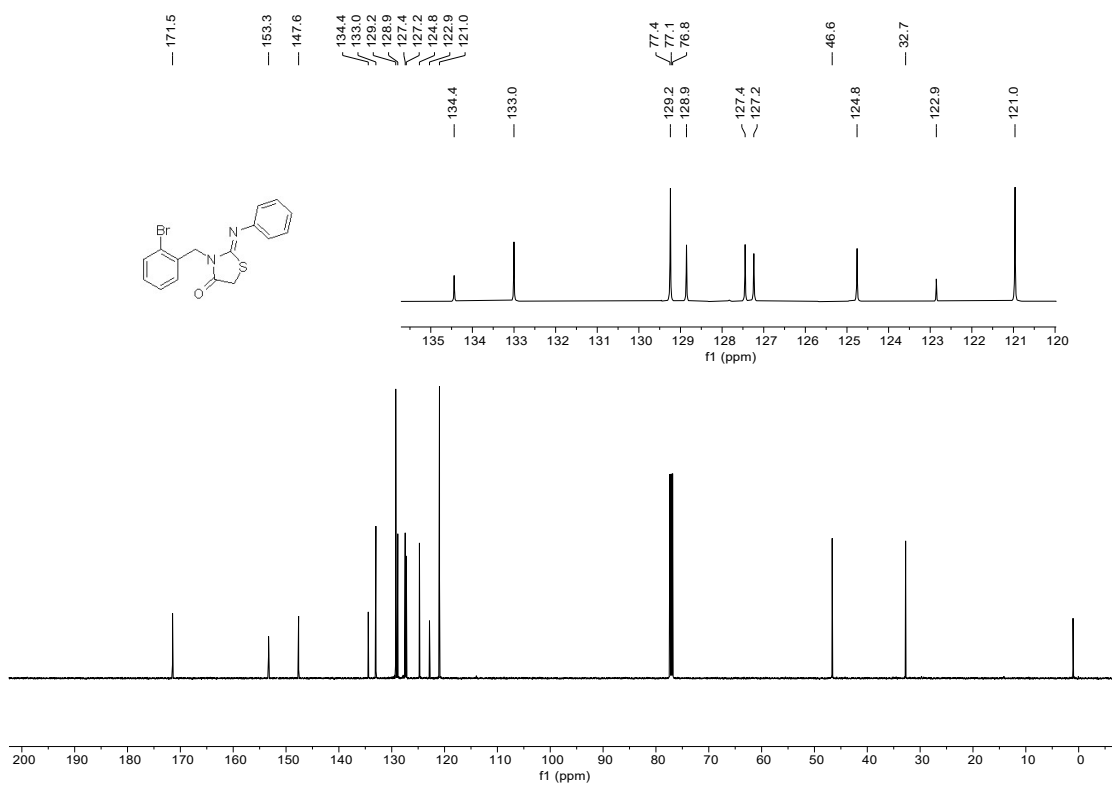

<sup>13</sup>C{<sup>1</sup>H} NMR of **4m** in CDCl<sub>3</sub> (126 MHz)

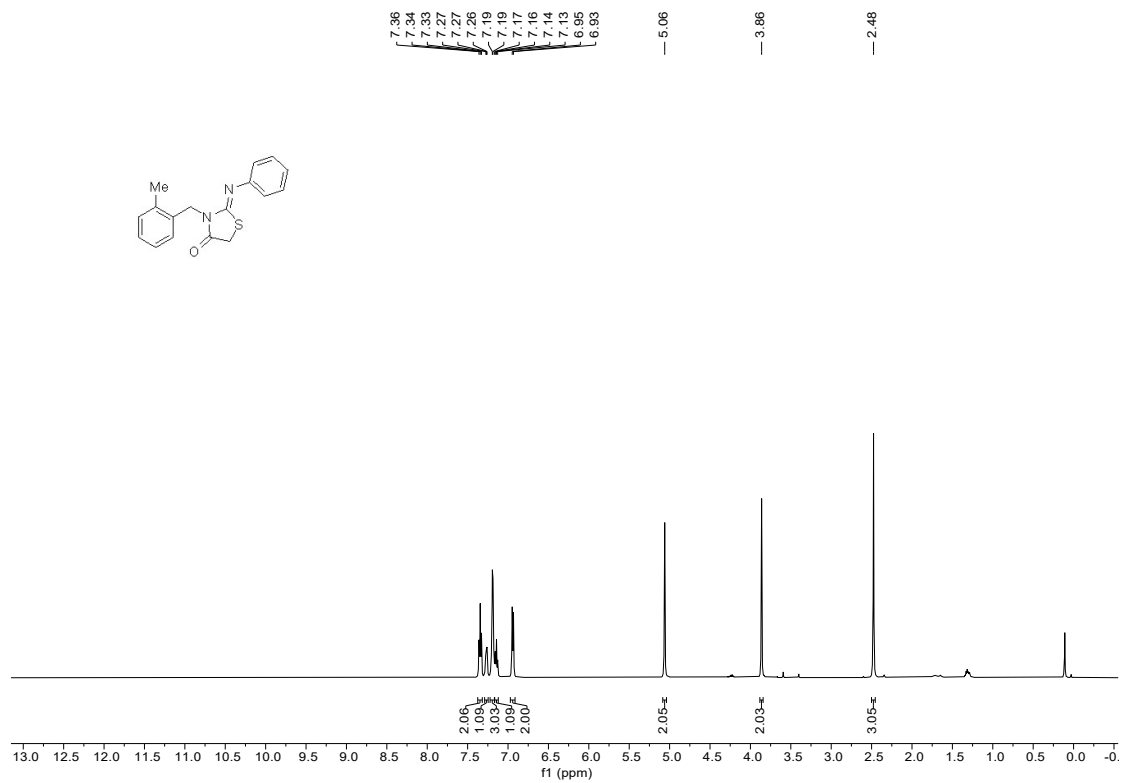

$^1\text{H}$  NMR of **4n** in  $\text{CDCl}_3$  (500 MHz)

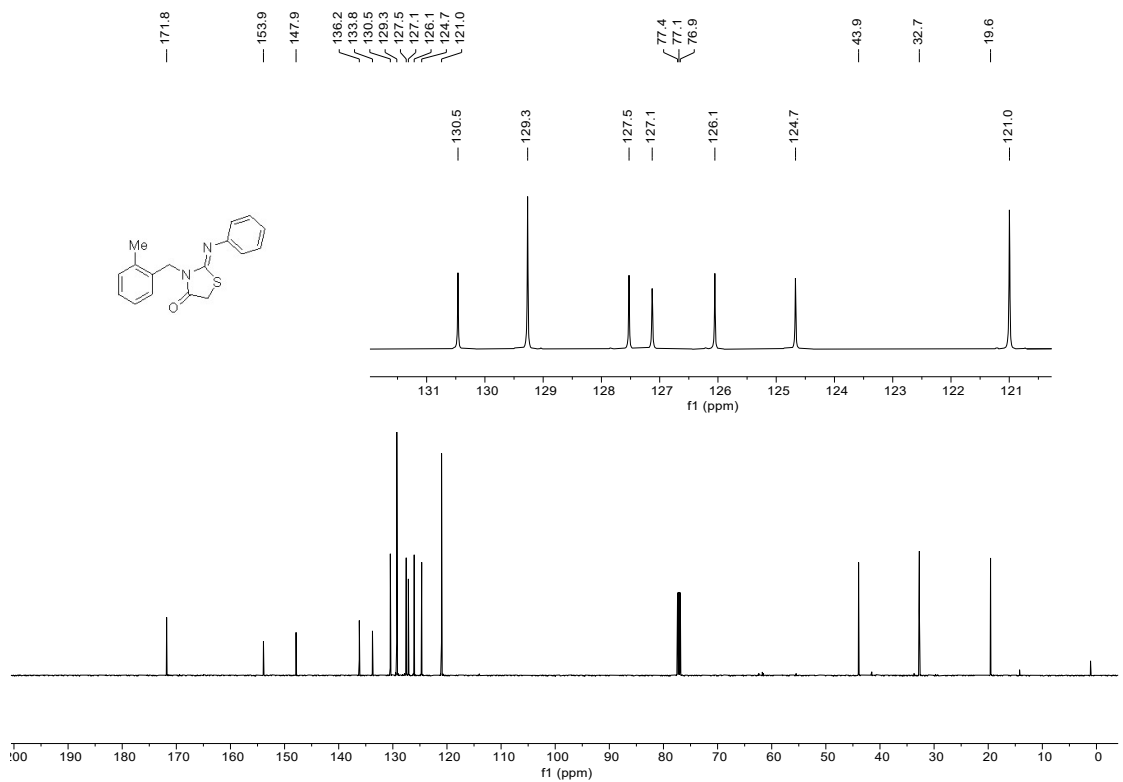

$^{13}\text{C}\{^1\text{H}\}$  NMR of **4n** in  $\text{CDCl}_3$  (126 MHz)

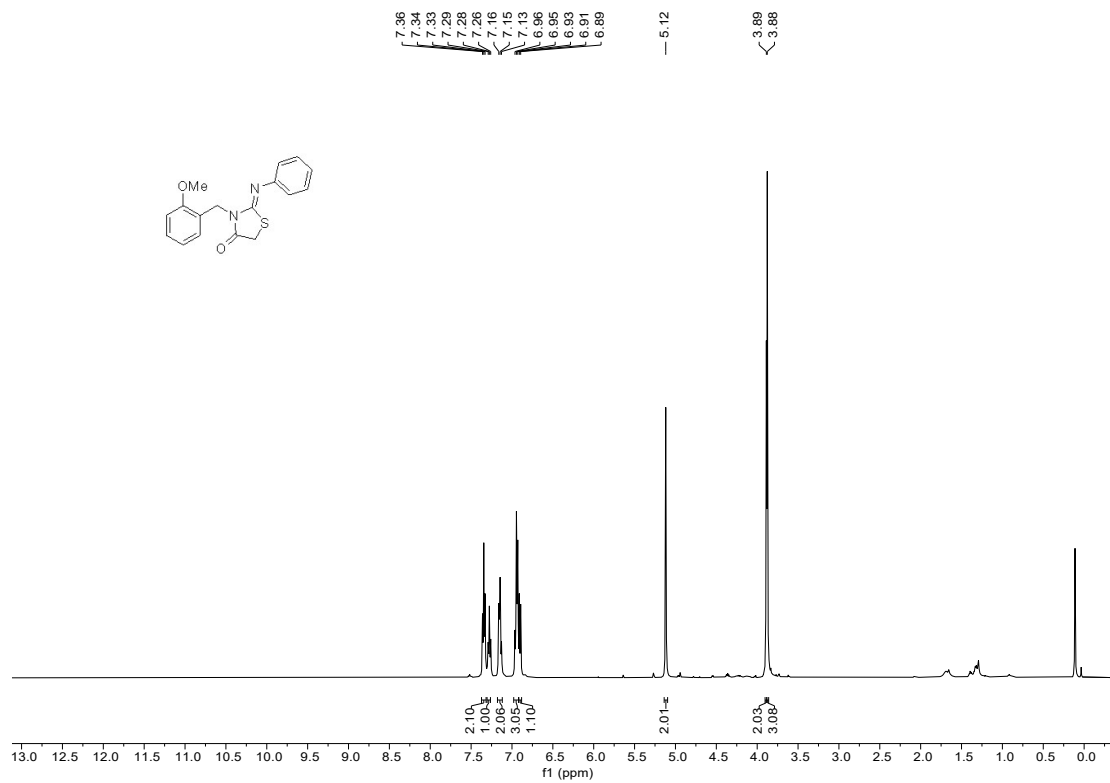

$^1\text{H NMR}$  of **4o** in  $\text{CDCl}_3$  (500 MHz)

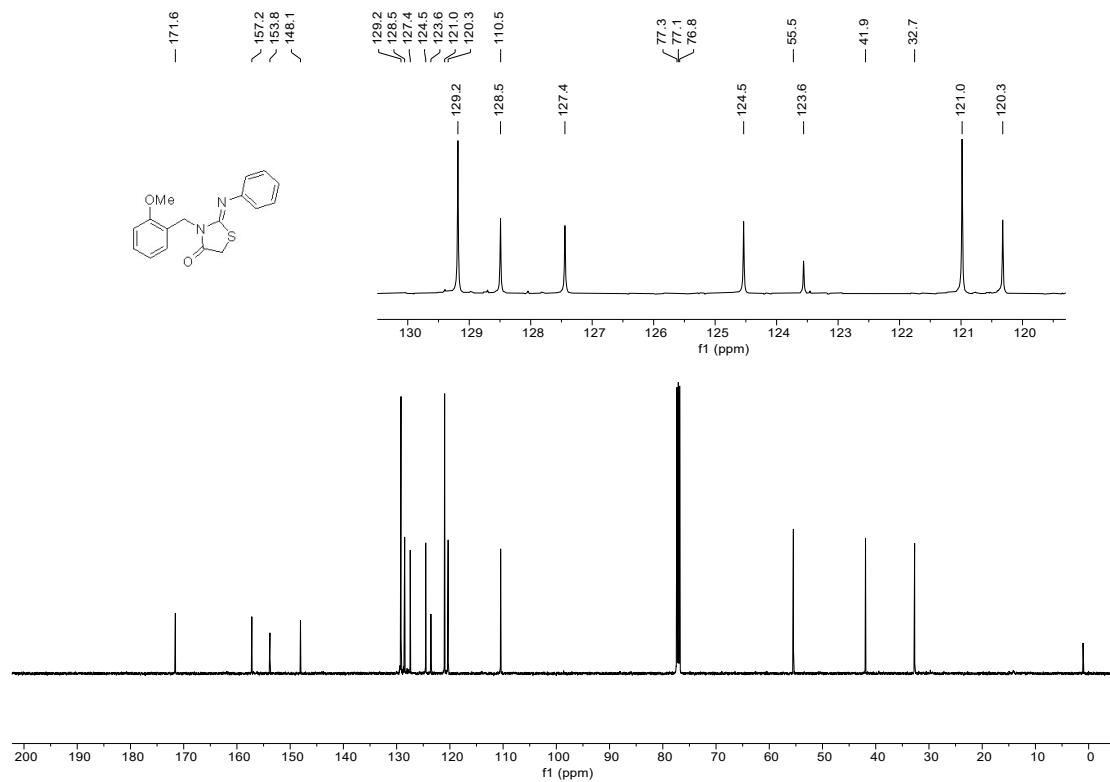

$^{13}\text{C}\{^1\text{H}\}$  NMR of **4o** in  $\text{CDCl}_3$  (126 MHz)



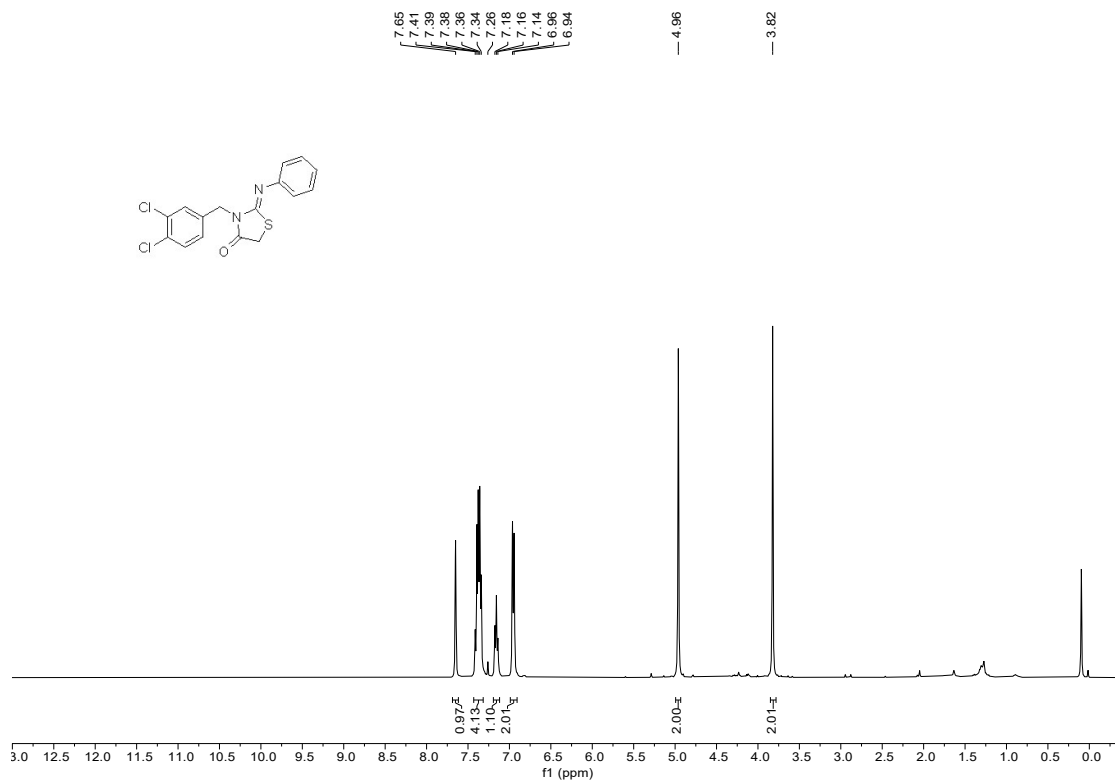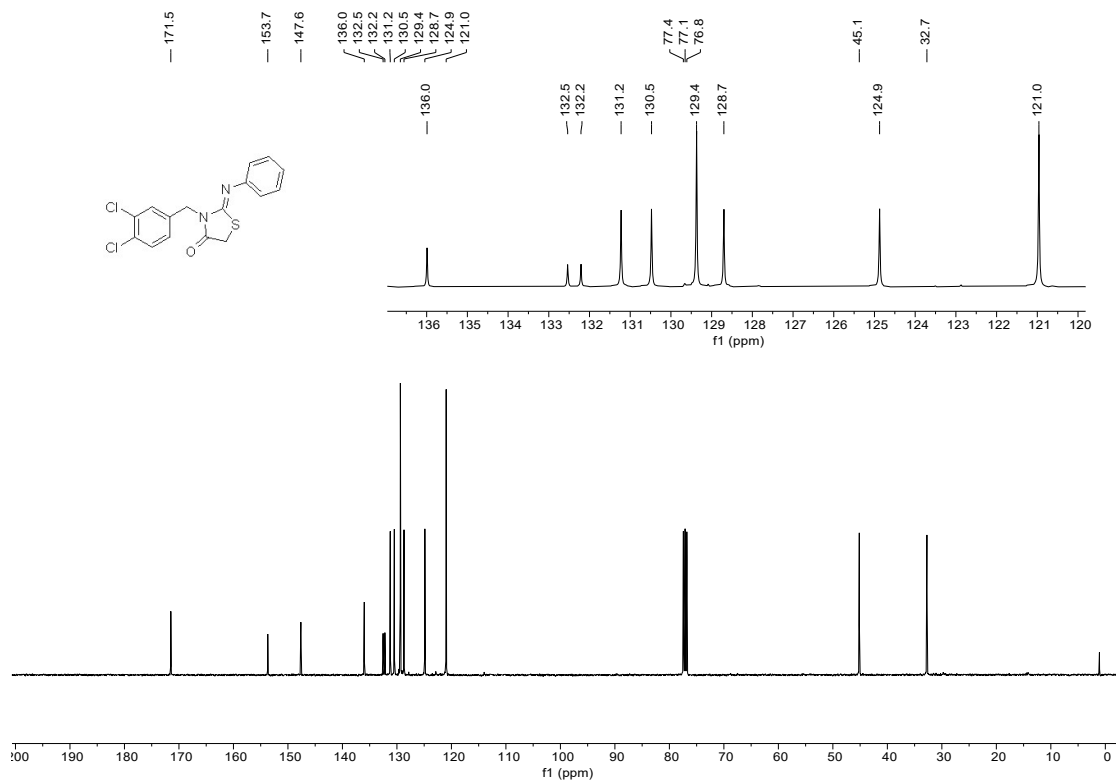

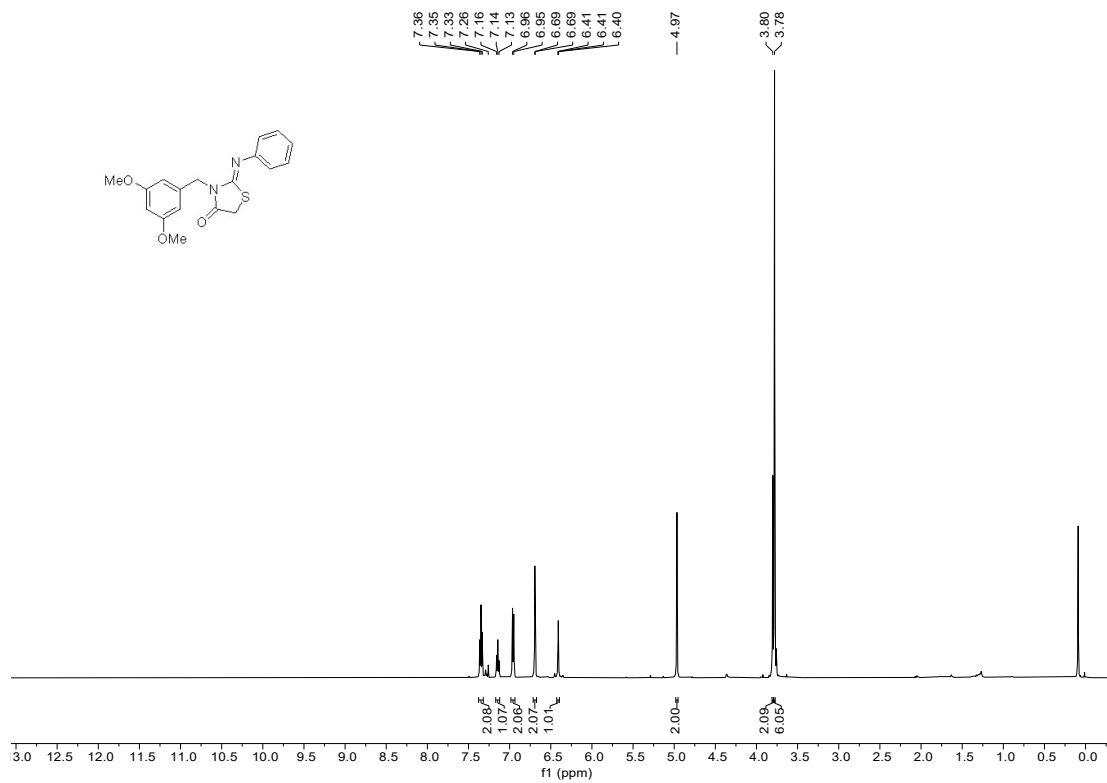

$^1\text{H}$  NMR of **4q** in  $\text{CDCl}_3$  (500 MHz)

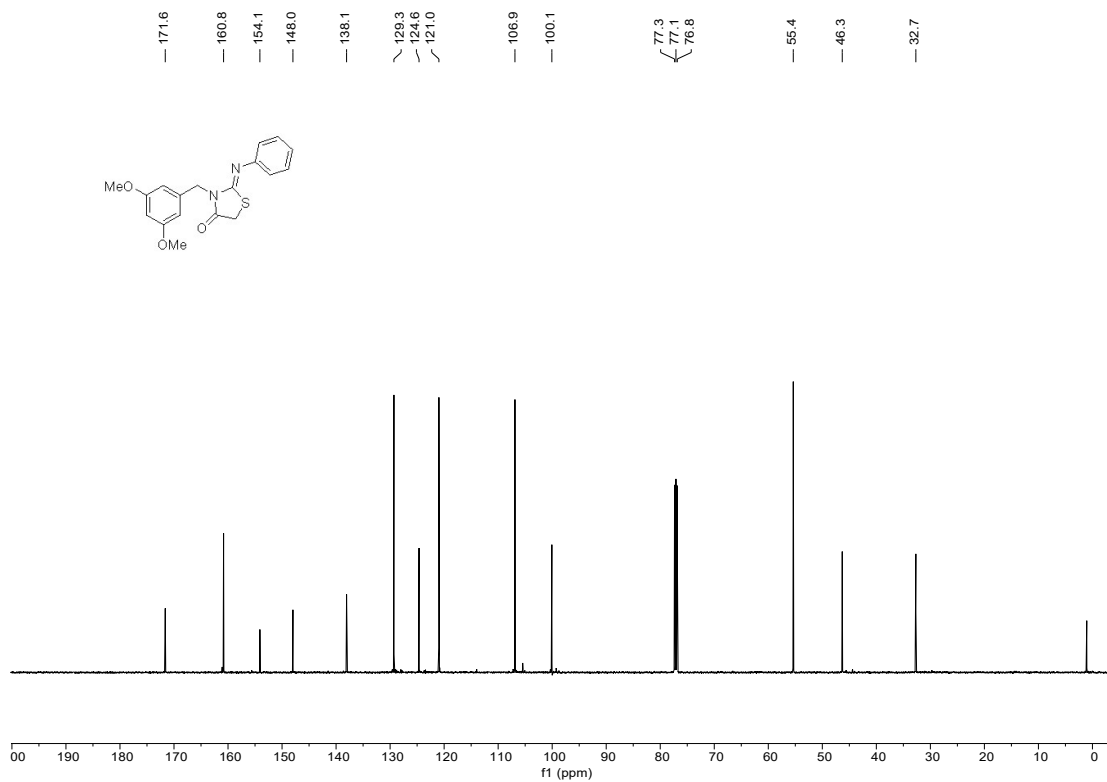

$^{13}\text{C}\{^1\text{H}\}$  NMR of **4q** in  $\text{CDCl}_3$  (126 MHz)



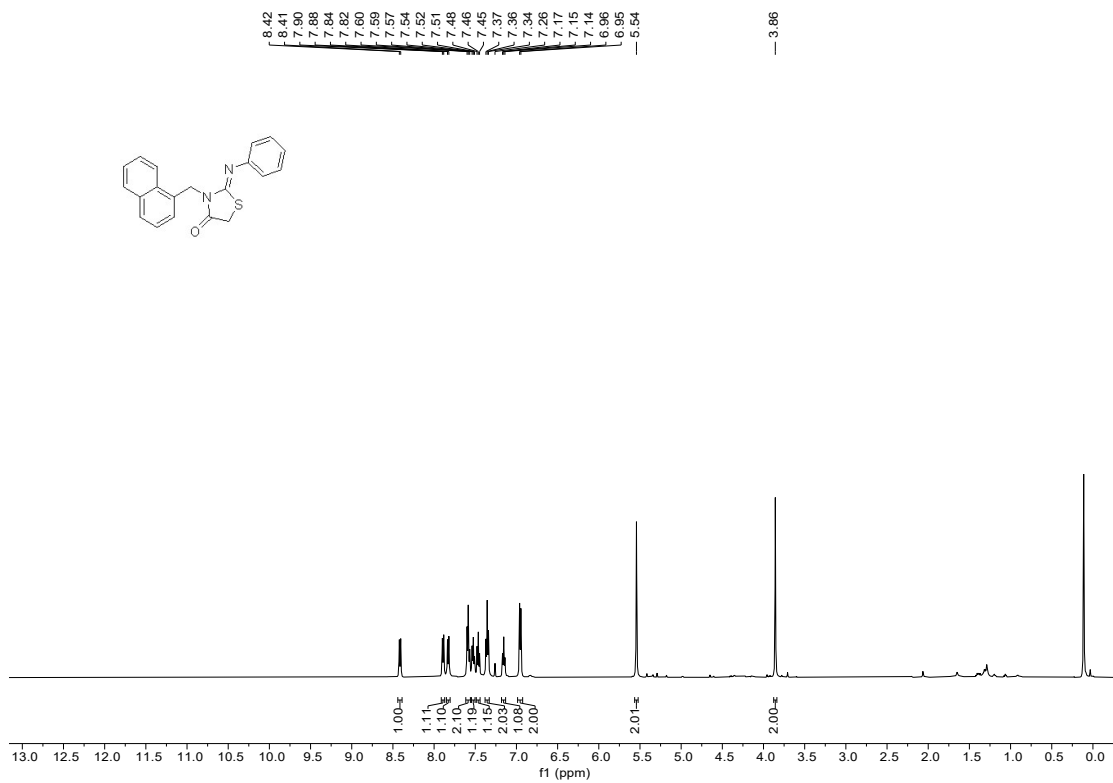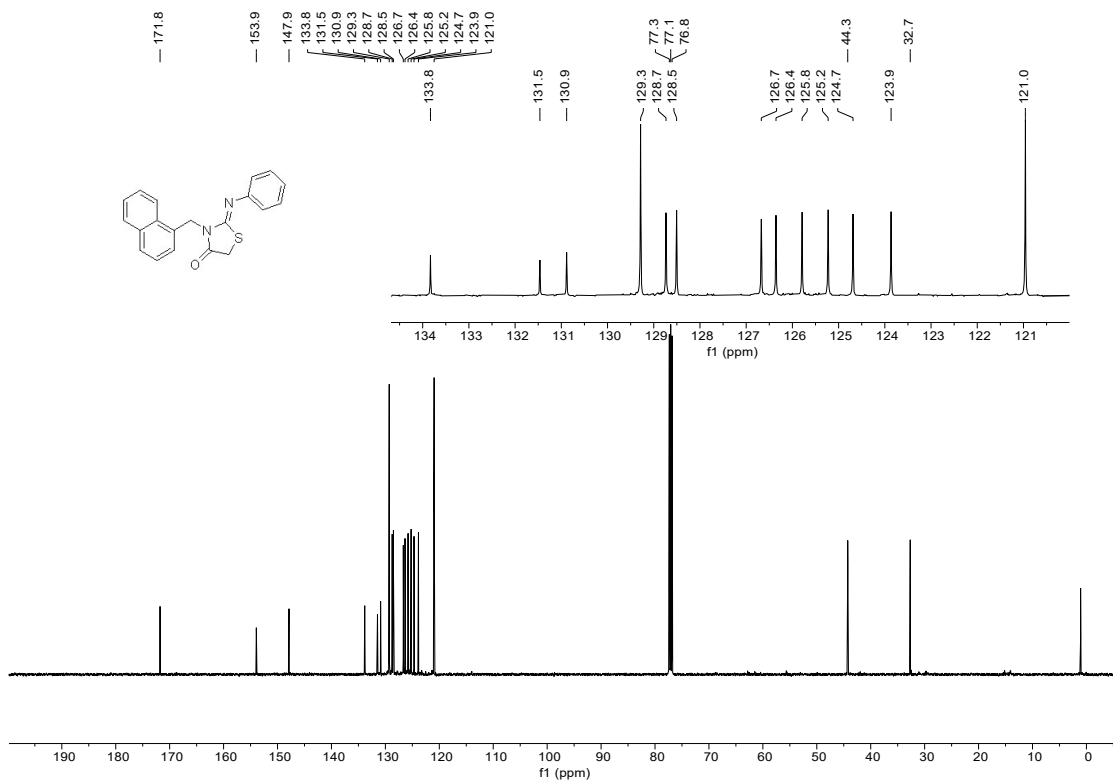

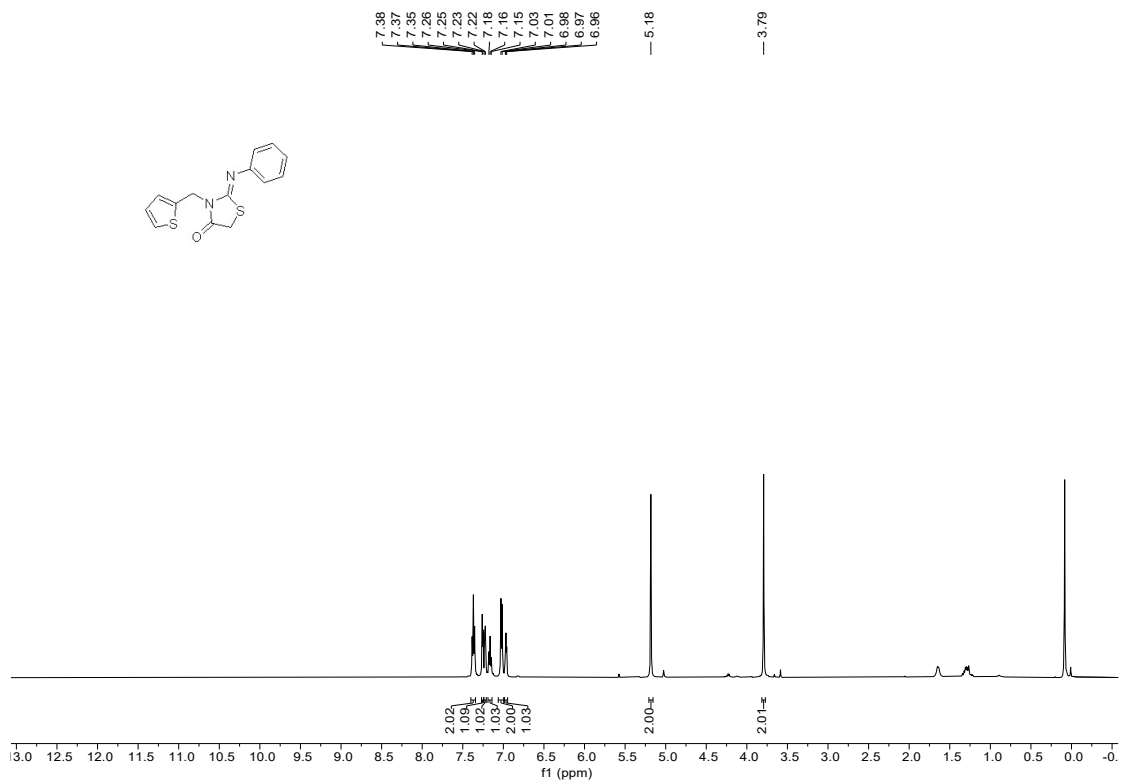

$^1\text{H}$  NMR of **4t** in  $\text{CDCl}_3$  (500 MHz)

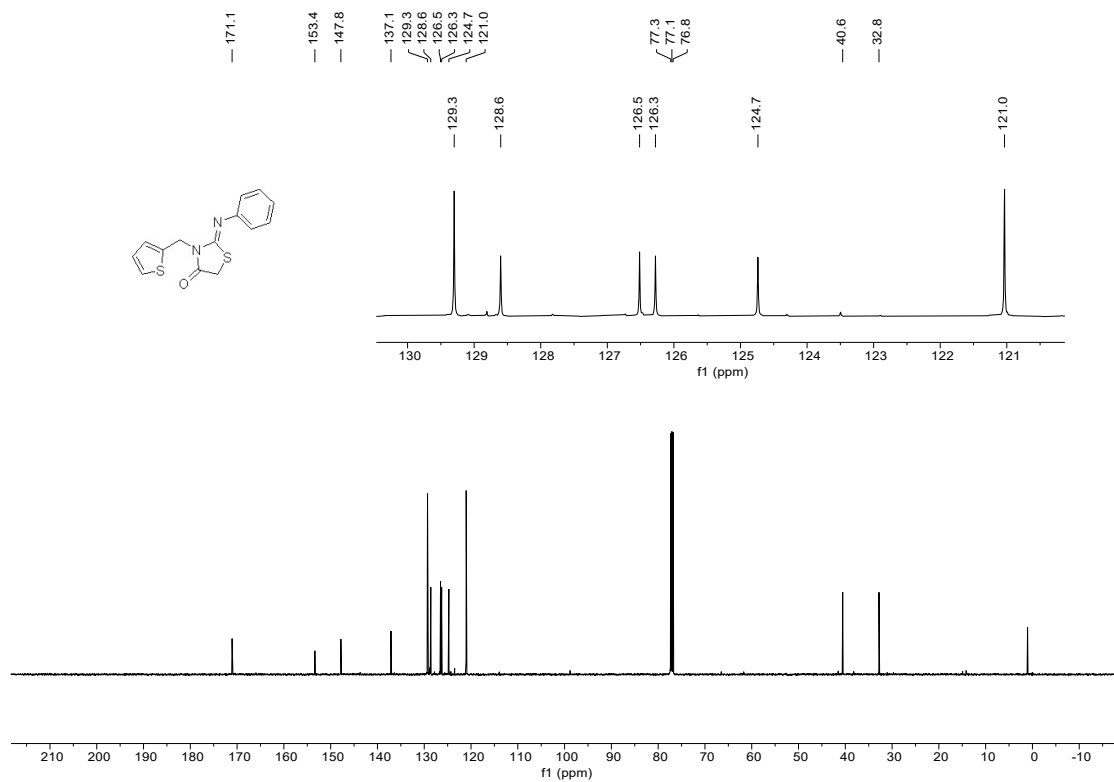

$^{13}\text{C}\{^1\text{H}\}$  NMR of **4t** in  $\text{CDCl}_3$  (126 MHz)

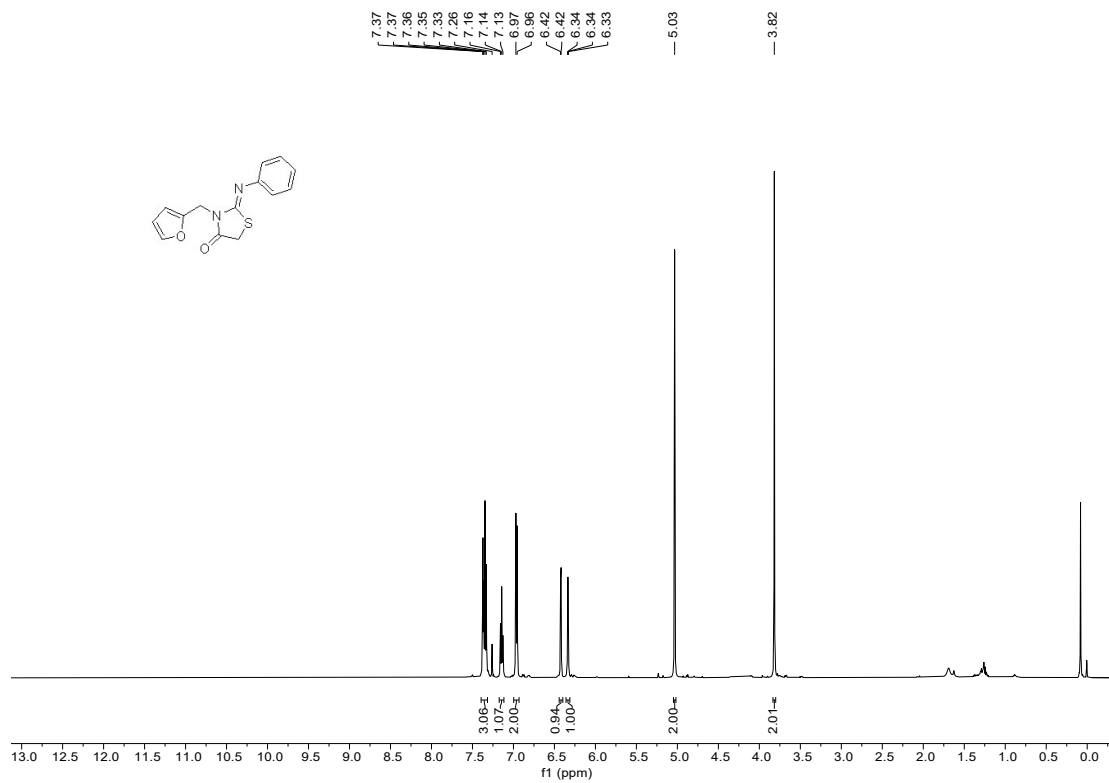

$^1\text{H}$  NMR of **4u** in  $\text{CDCl}_3$  (500 MHz)

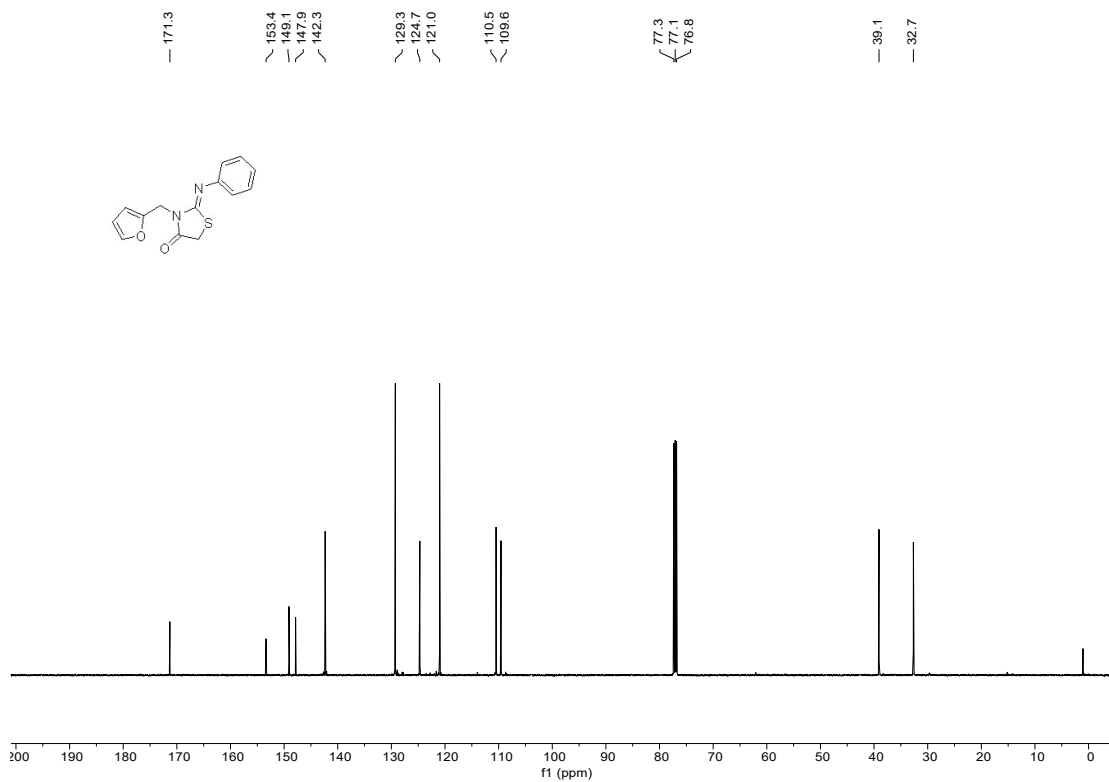

$^{13}\text{C}\{^1\text{H}\}$  NMR of **4u** in  $\text{CDCl}_3$  (126 MHz)

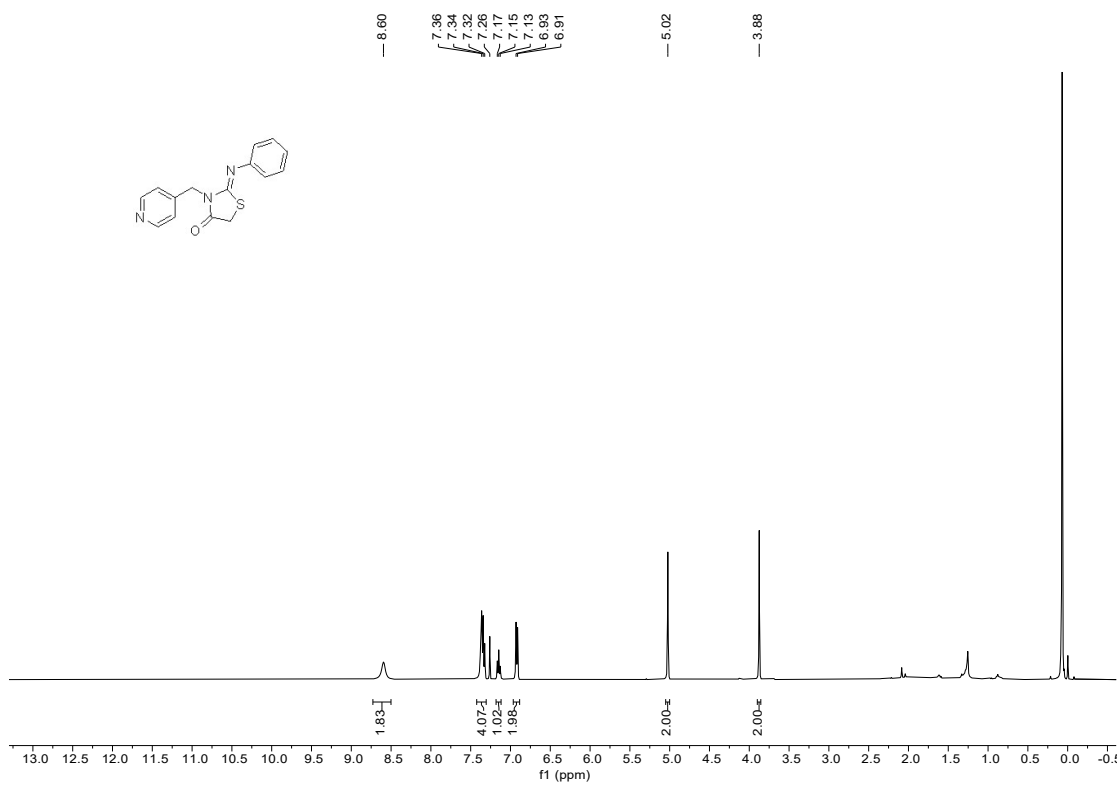

<sup>1</sup>H NMR of 4v in CDCl<sub>3</sub> (400 MHz)

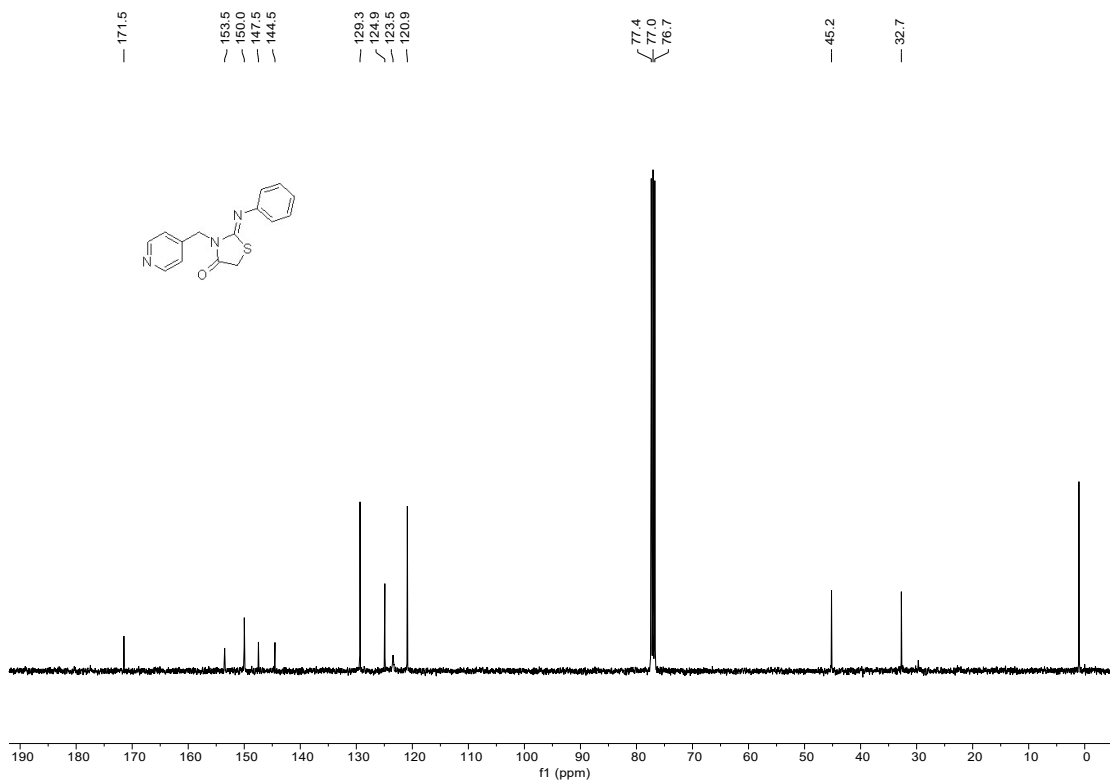

<sup>13</sup>C{<sup>1</sup>H} NMR of 4v in CDCl<sub>3</sub> (100 MHz)

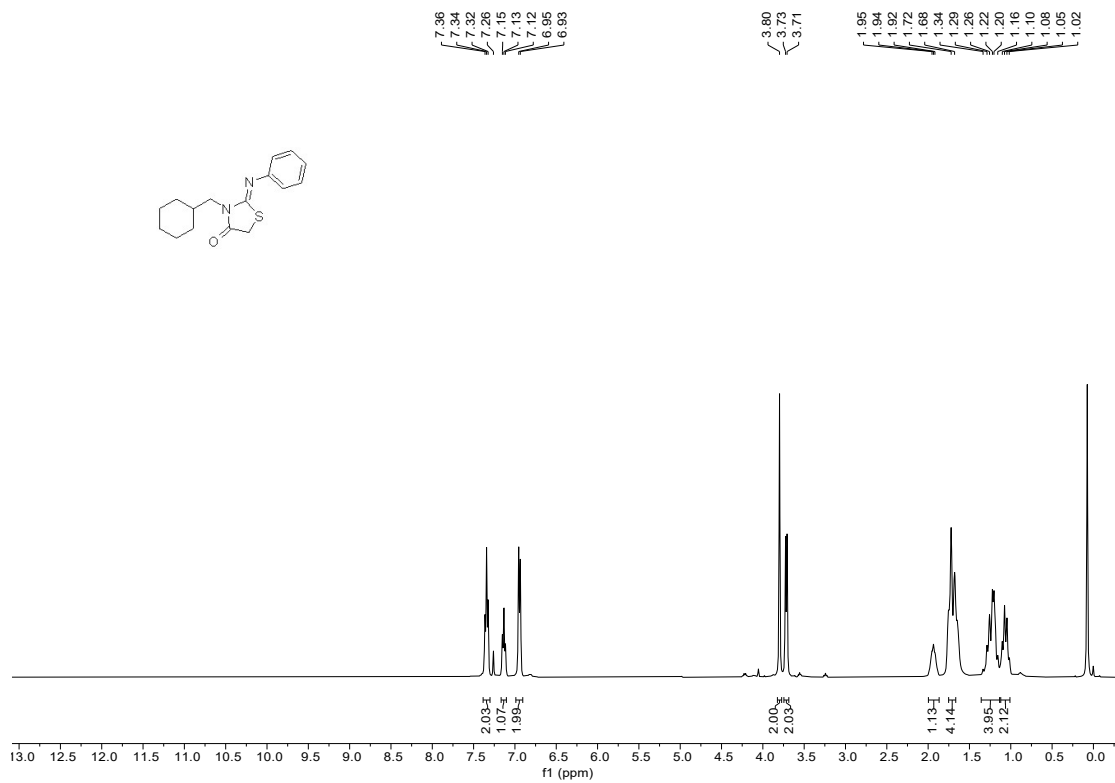

$^1\text{H}$  NMR of **4w** in  $\text{CDCl}_3$  (400 MHz)

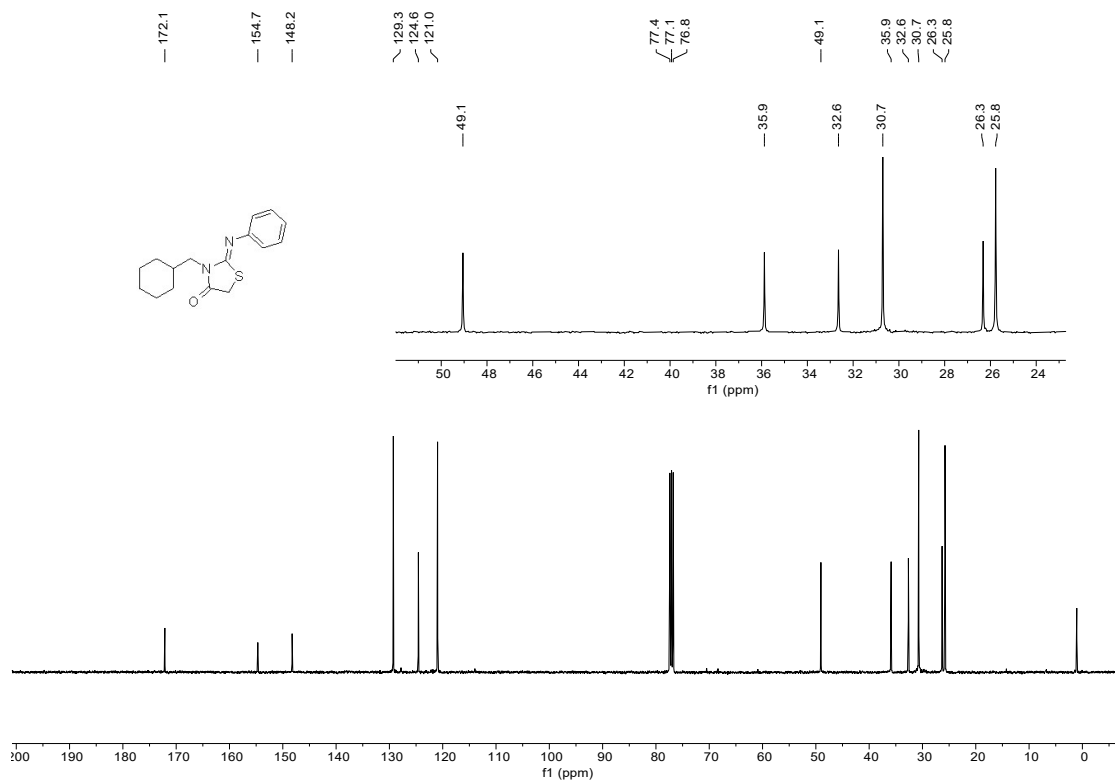

$^{13}\text{C}\{^1\text{H}\}$  NMR of **4w** in  $\text{CDCl}_3$  (100 MHz)



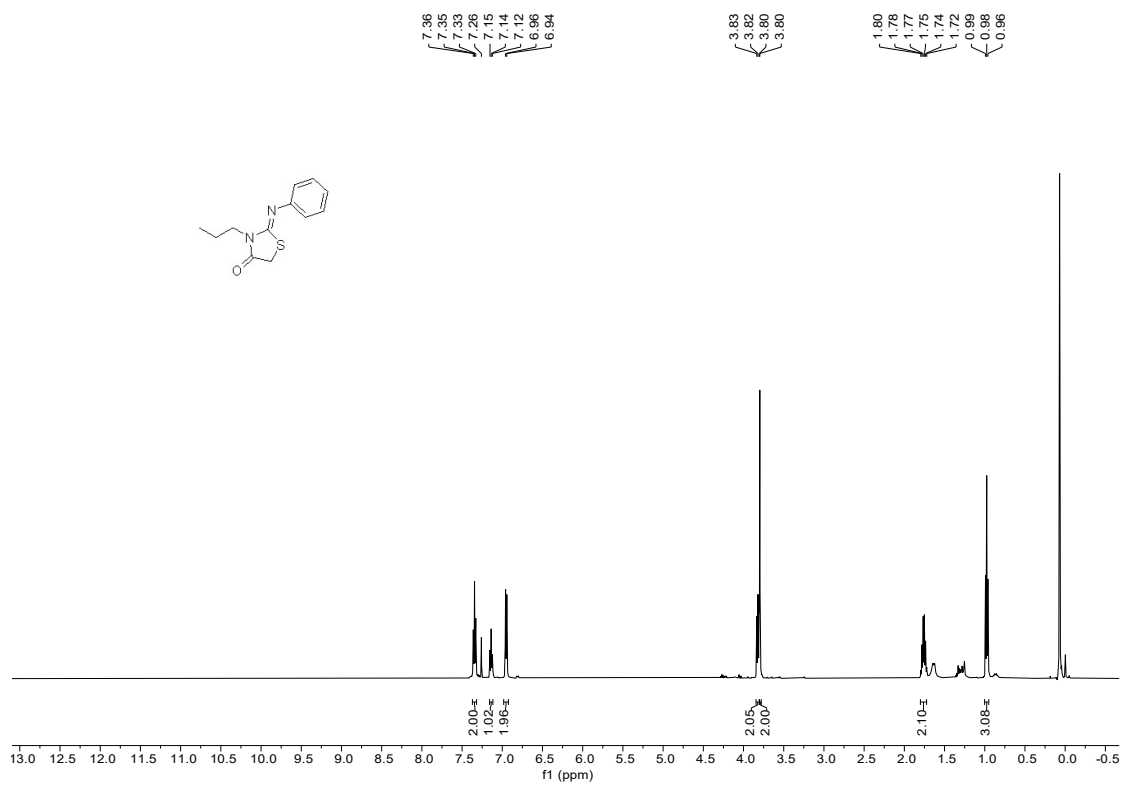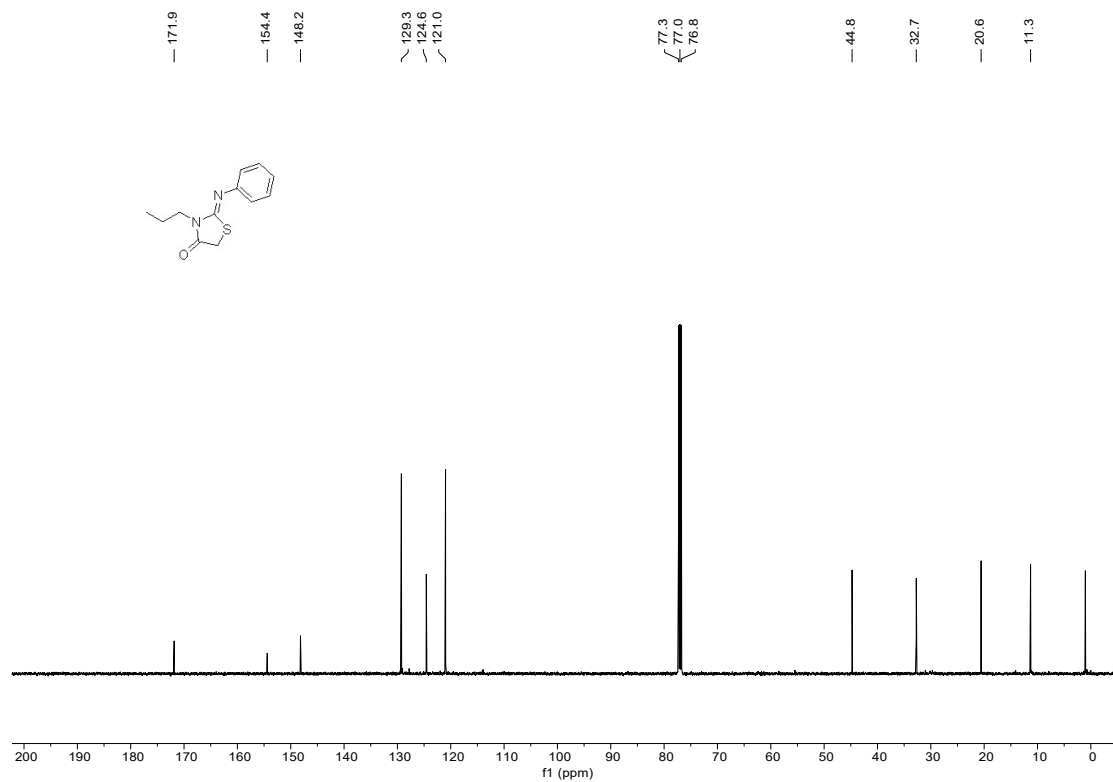

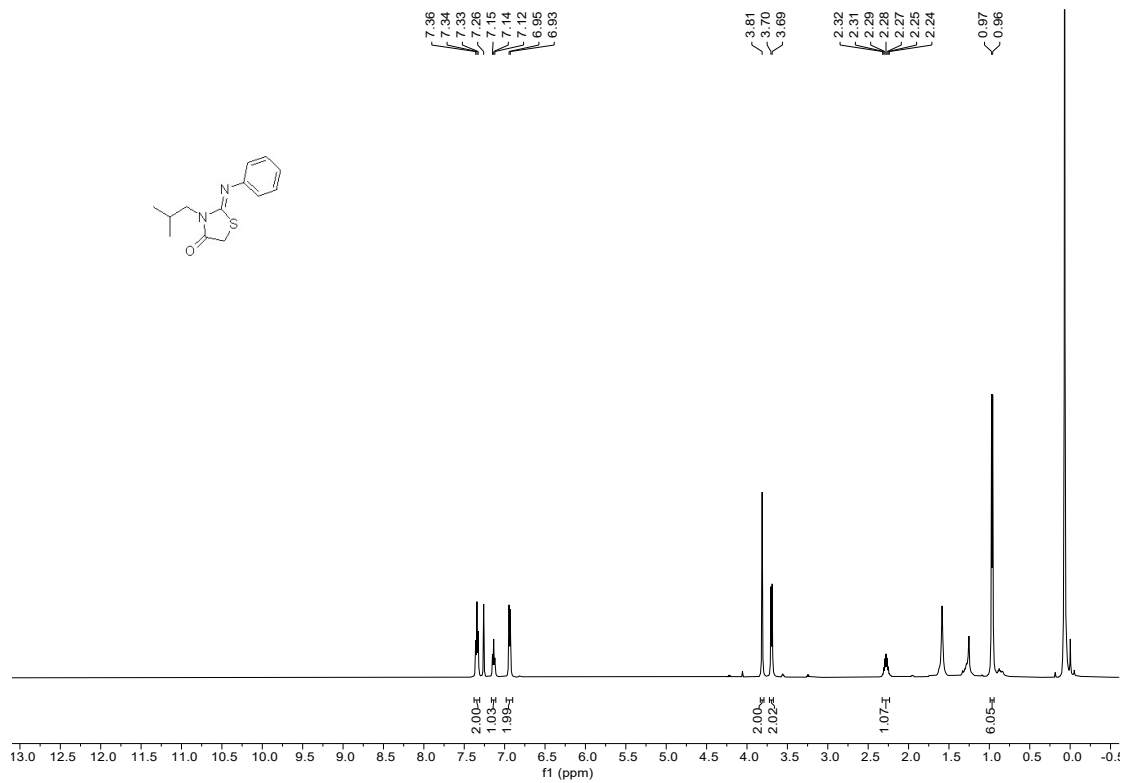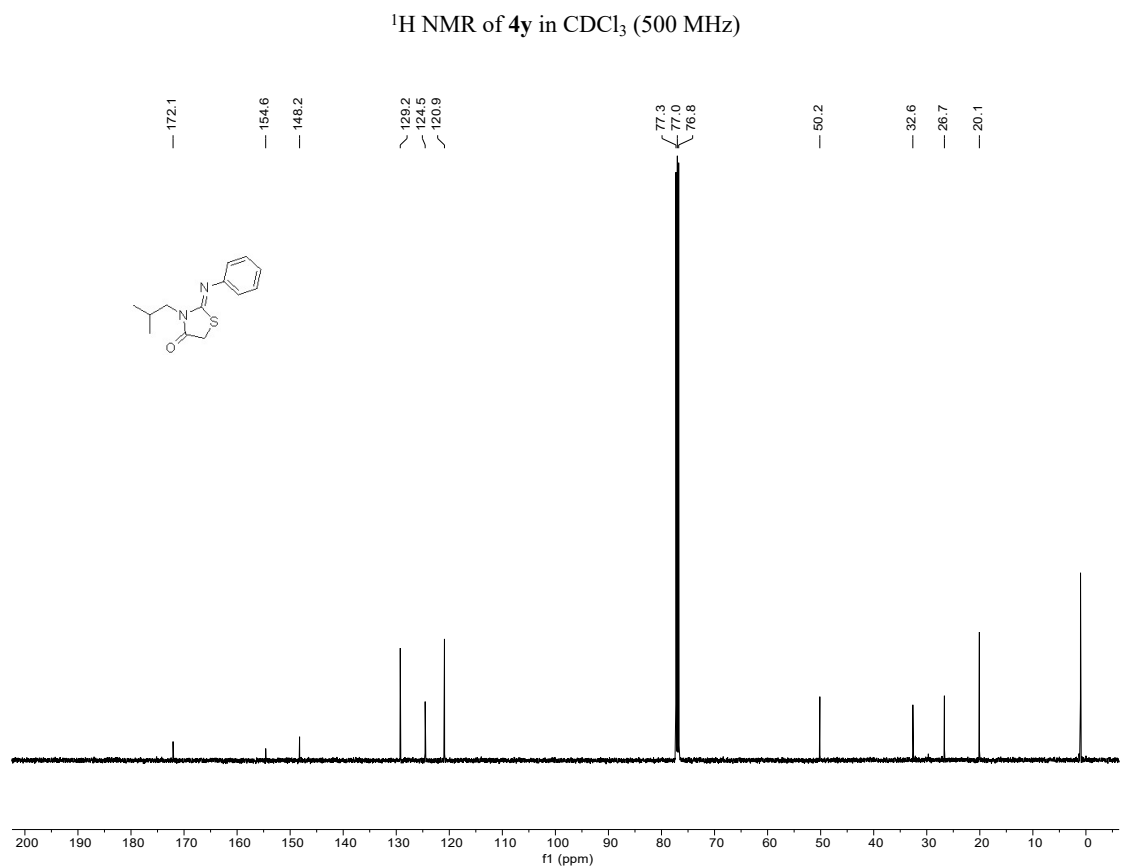

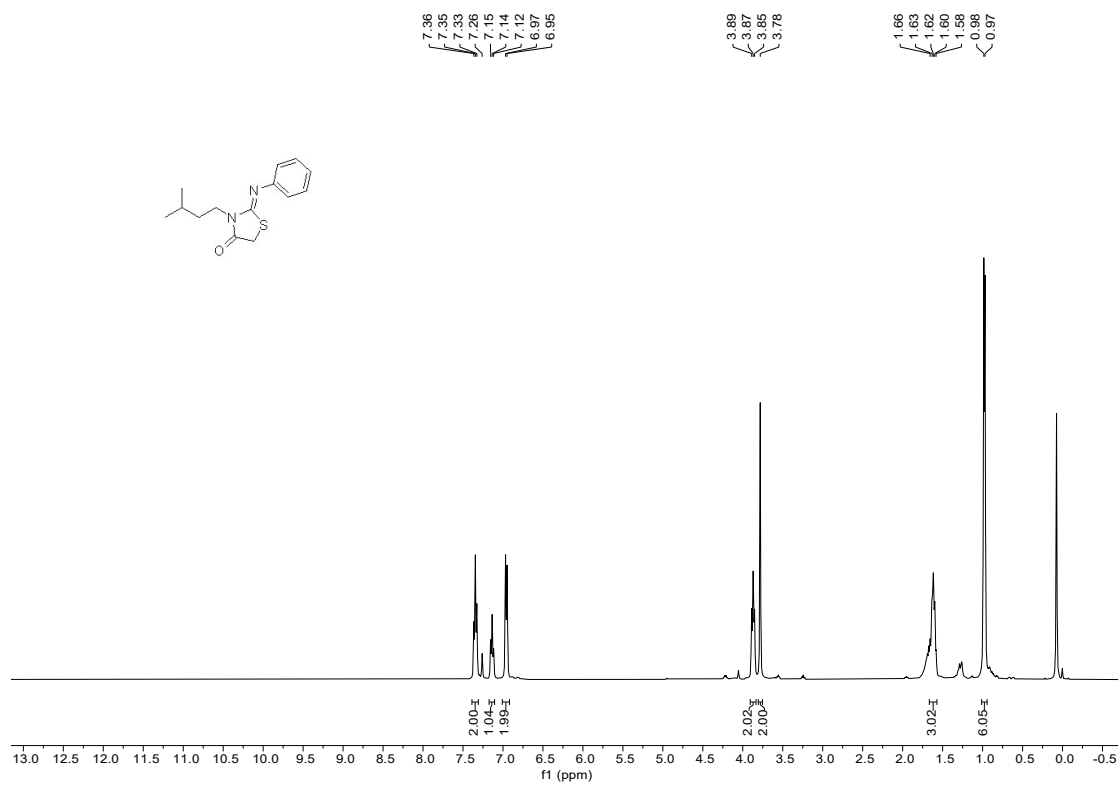

<sup>1</sup>H NMR of **4za** in CDCl<sub>3</sub> (400 MHz)

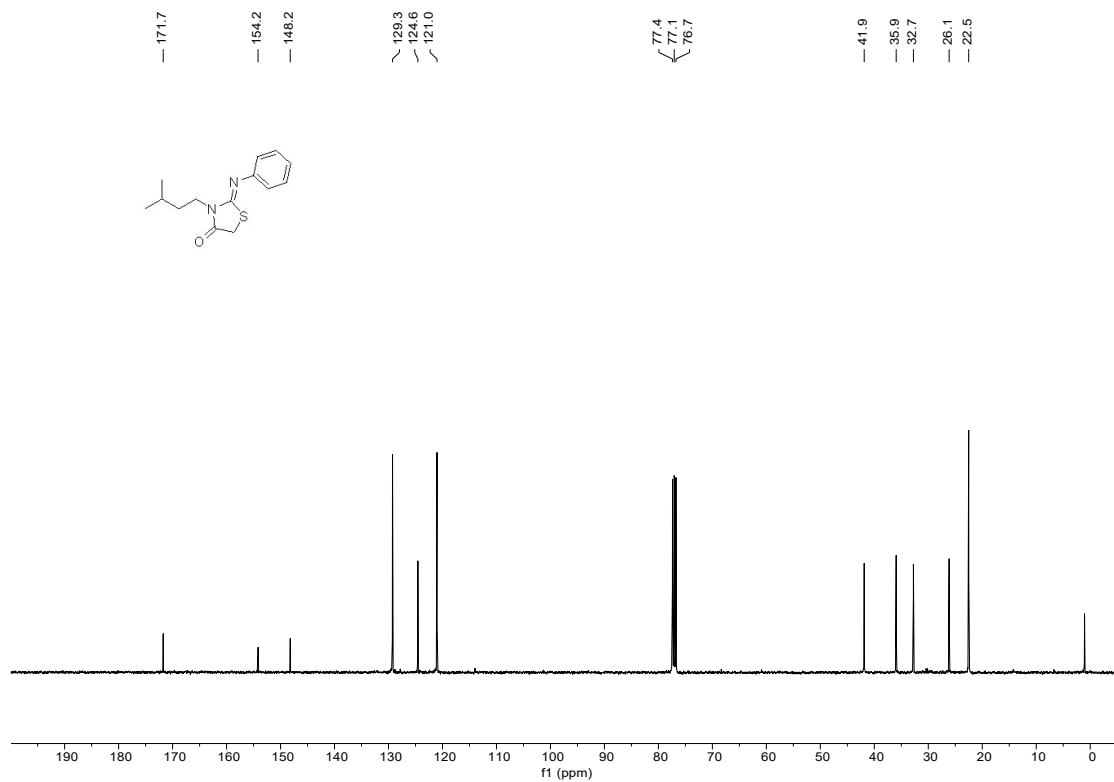

<sup>13</sup>C{<sup>1</sup>H} NMR of **4za** in CDCl<sub>3</sub> (100 MHz)

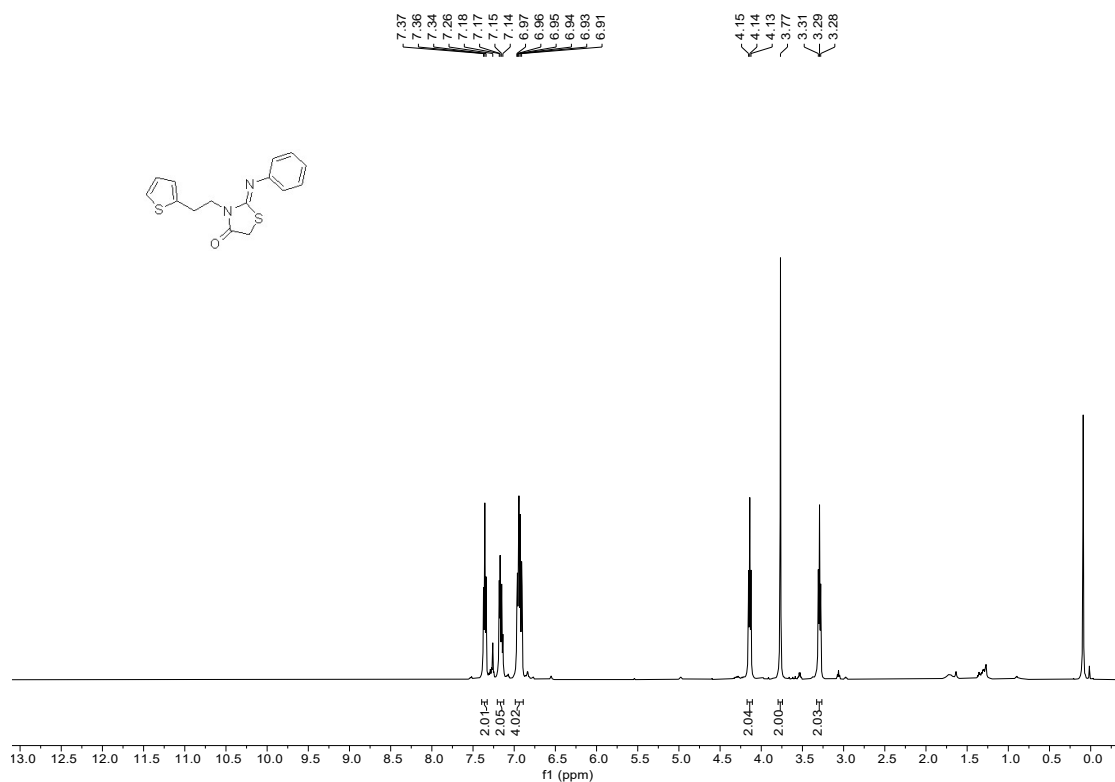

$^1\text{H}$  NMR of **4zb** in  $\text{CDCl}_3$  (500 MHz)

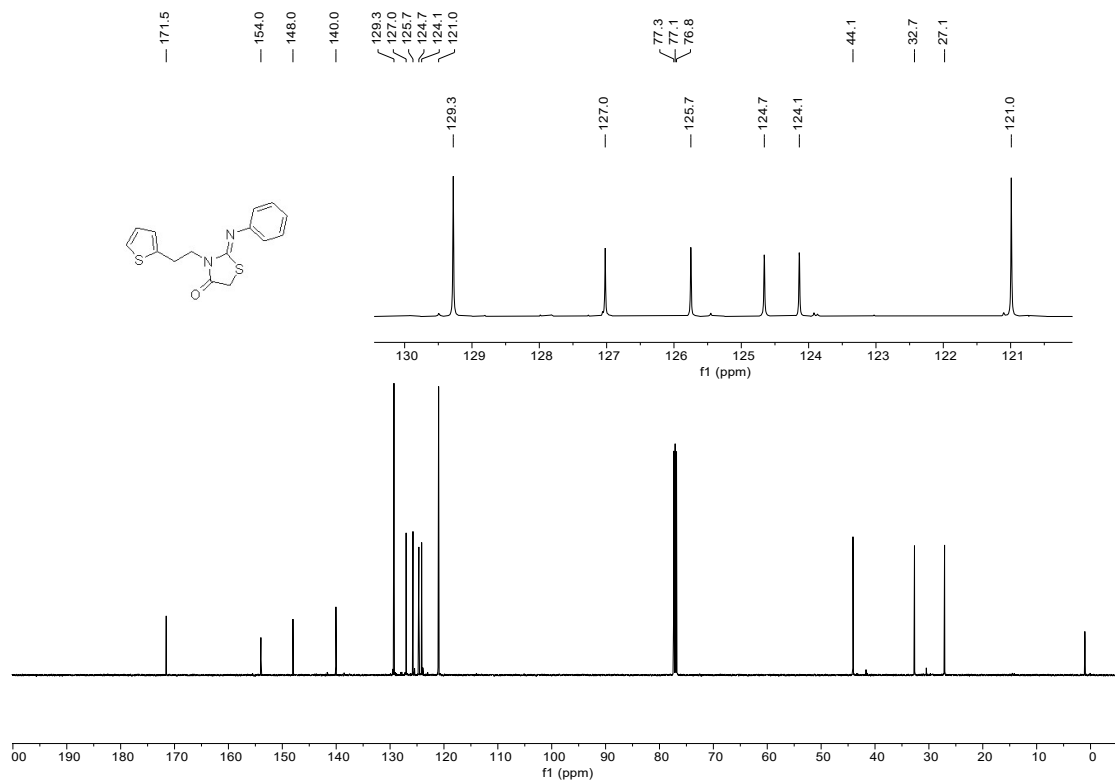

$^{13}\text{C}\{^1\text{H}\}$  NMR of **4zb** in  $\text{CDCl}_3$  (126 MHz)

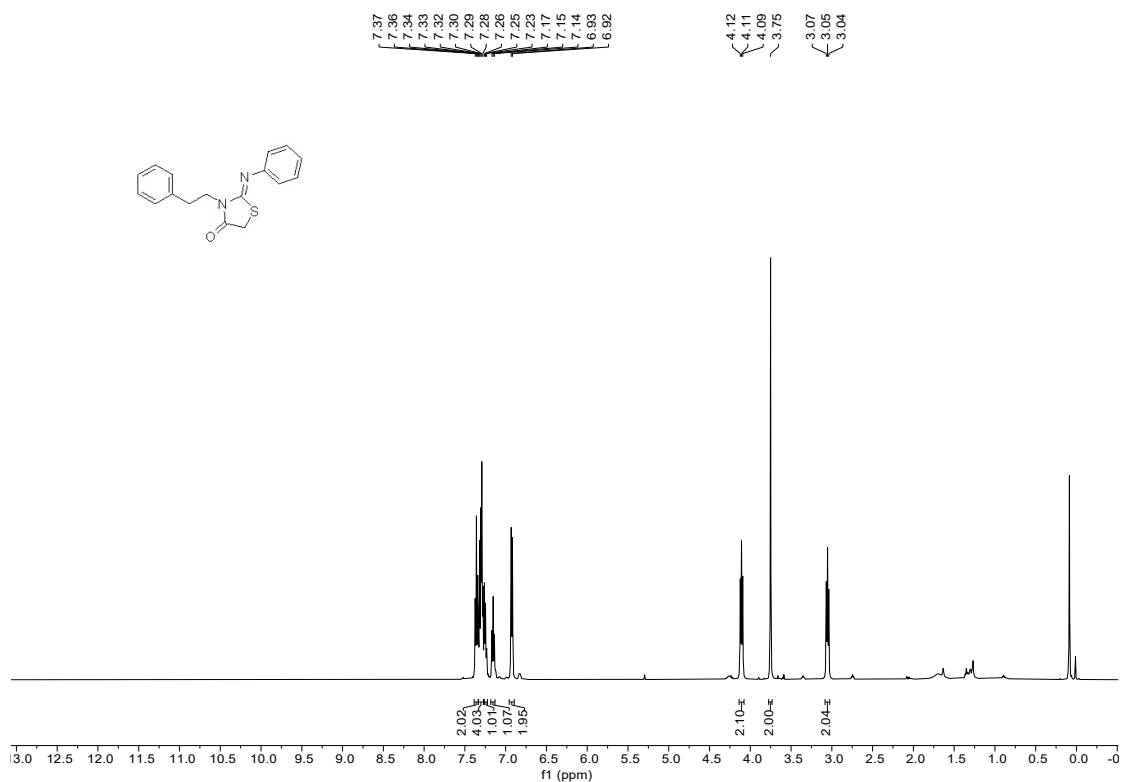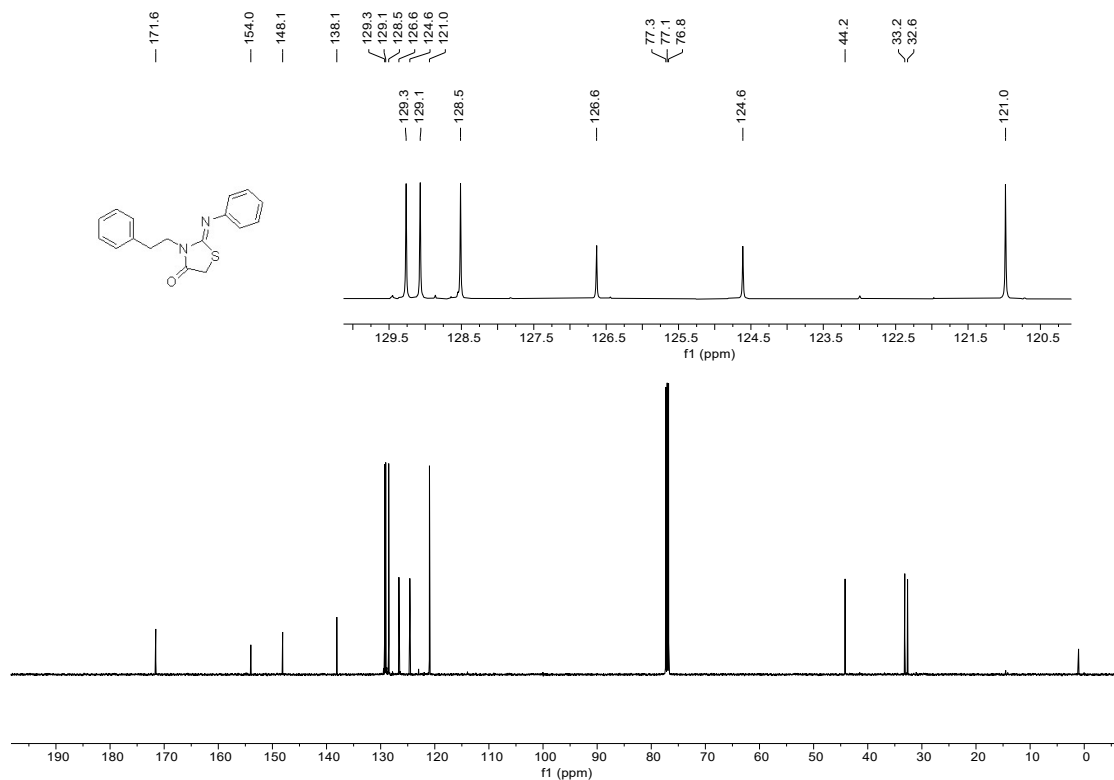

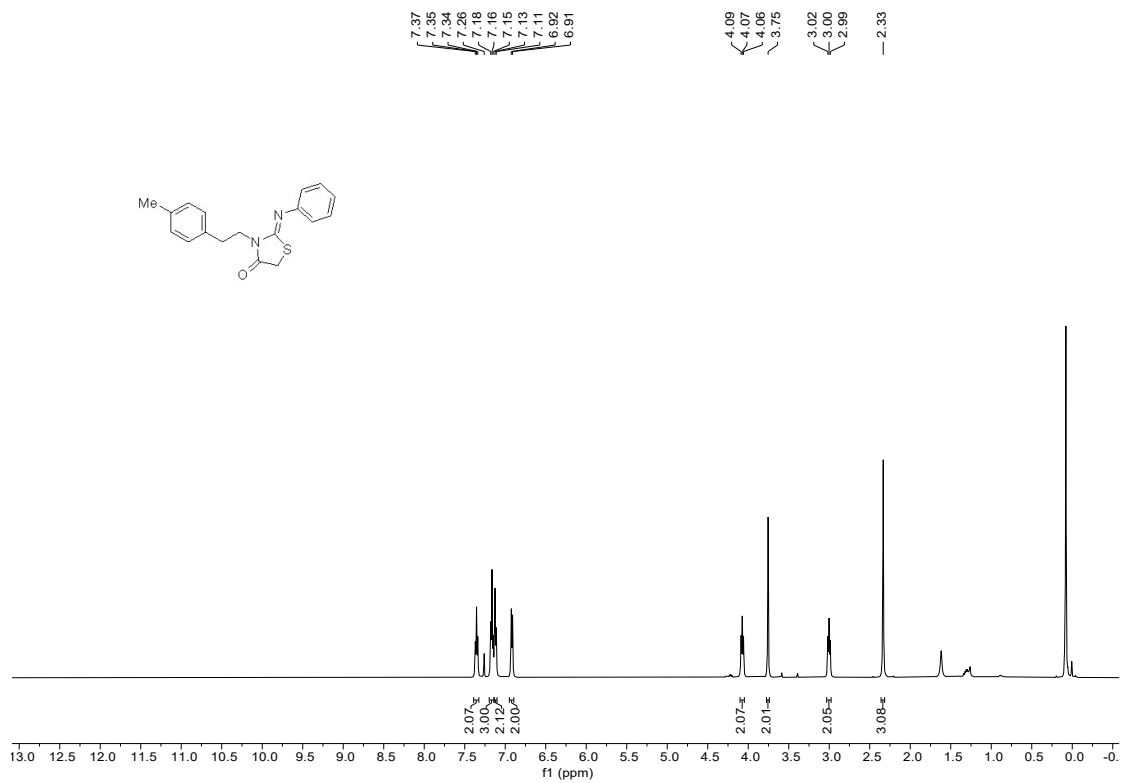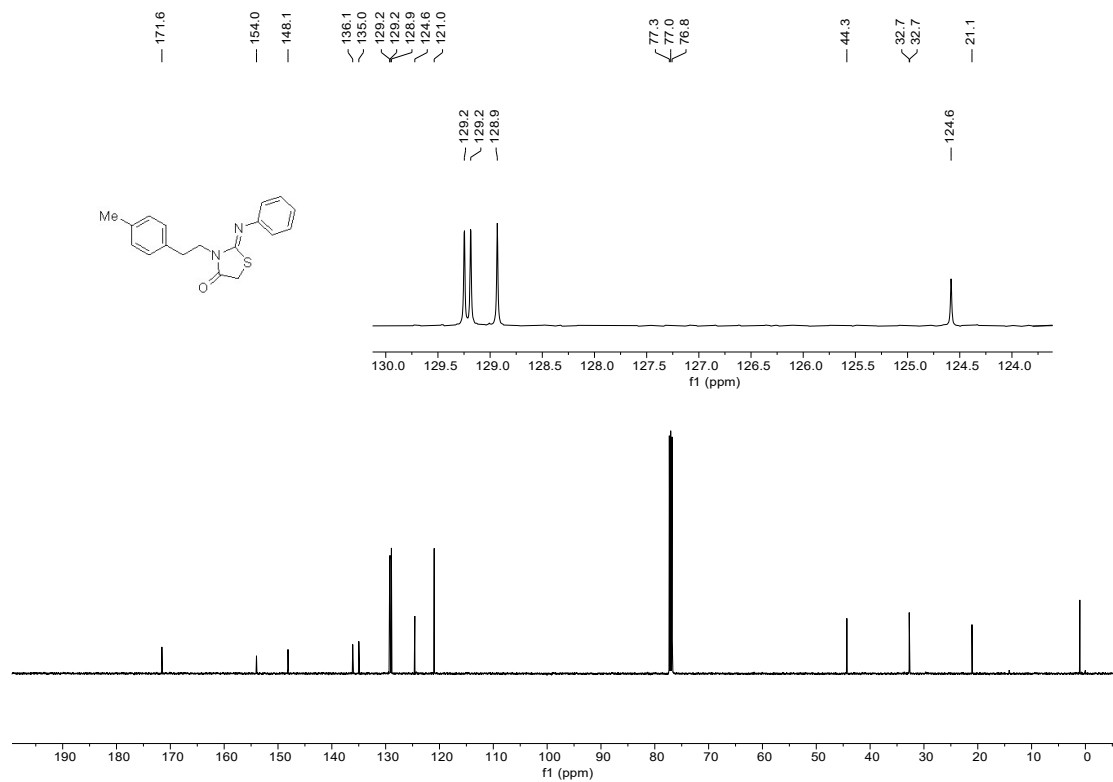

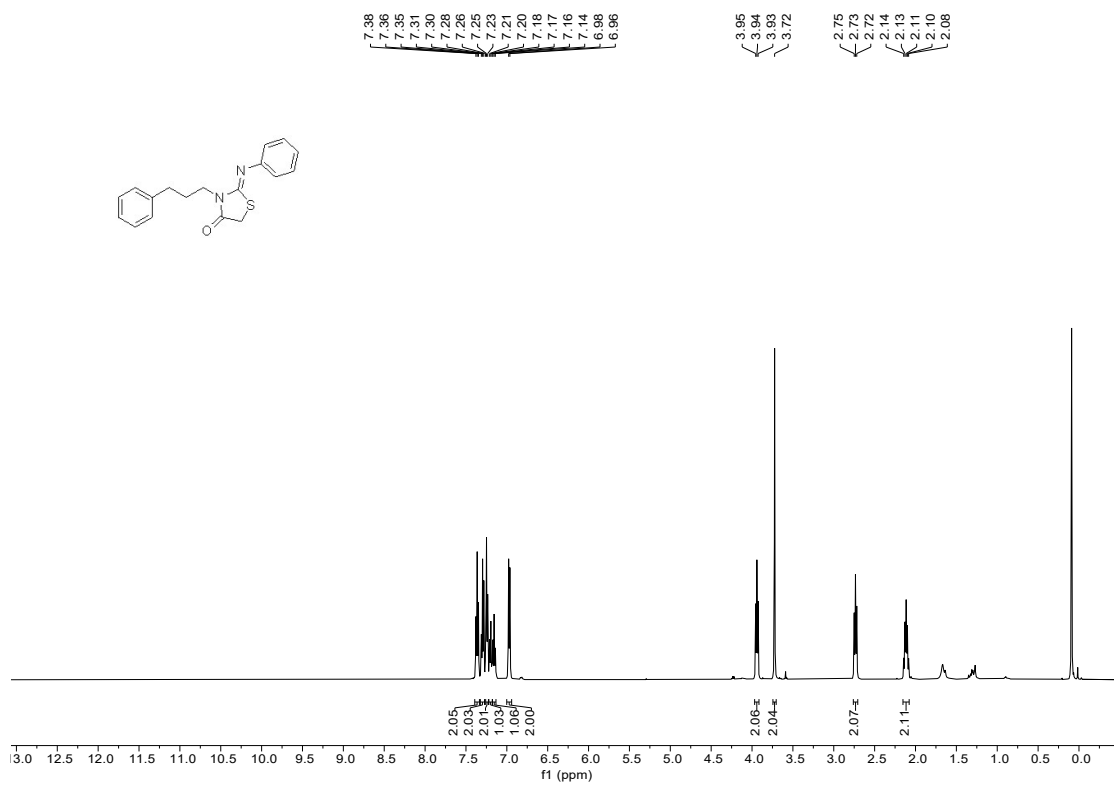

$^1\text{H NMR}$  of **4ze** in  $\text{CDCl}_3$  (500 MHz)

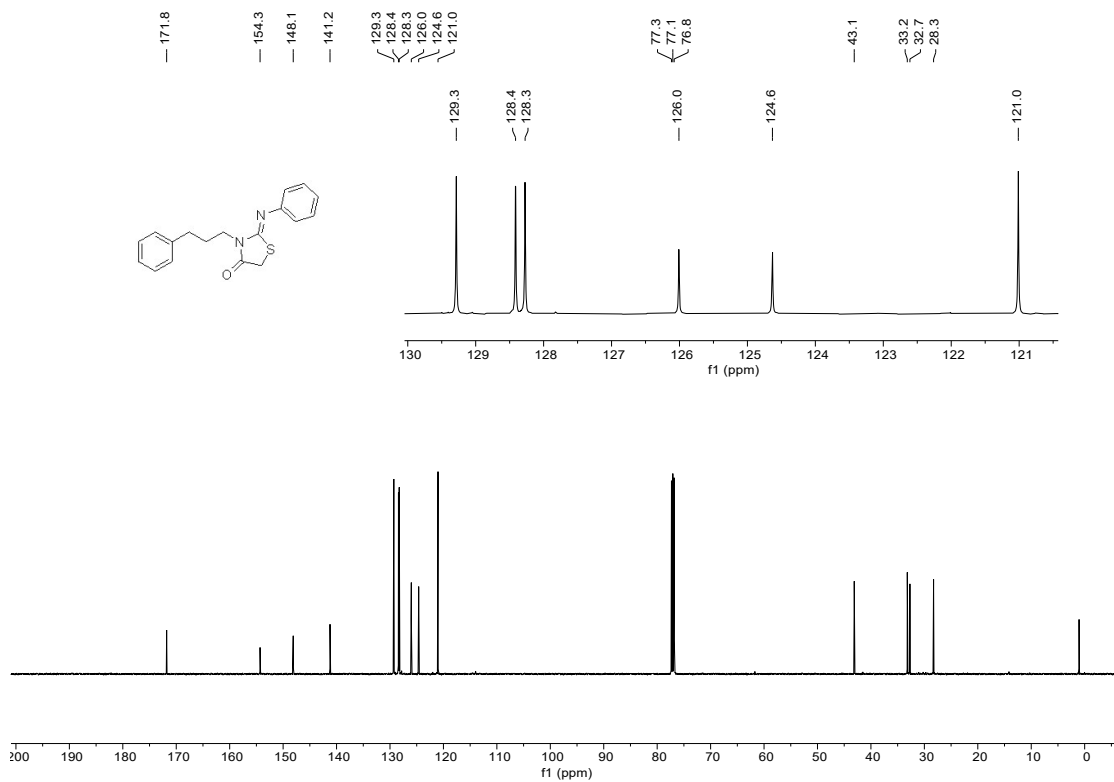

$^{13}\text{C}\{^1\text{H}\}$  NMR of **4ze** in  $\text{CDCl}_3$  (126 MHz)

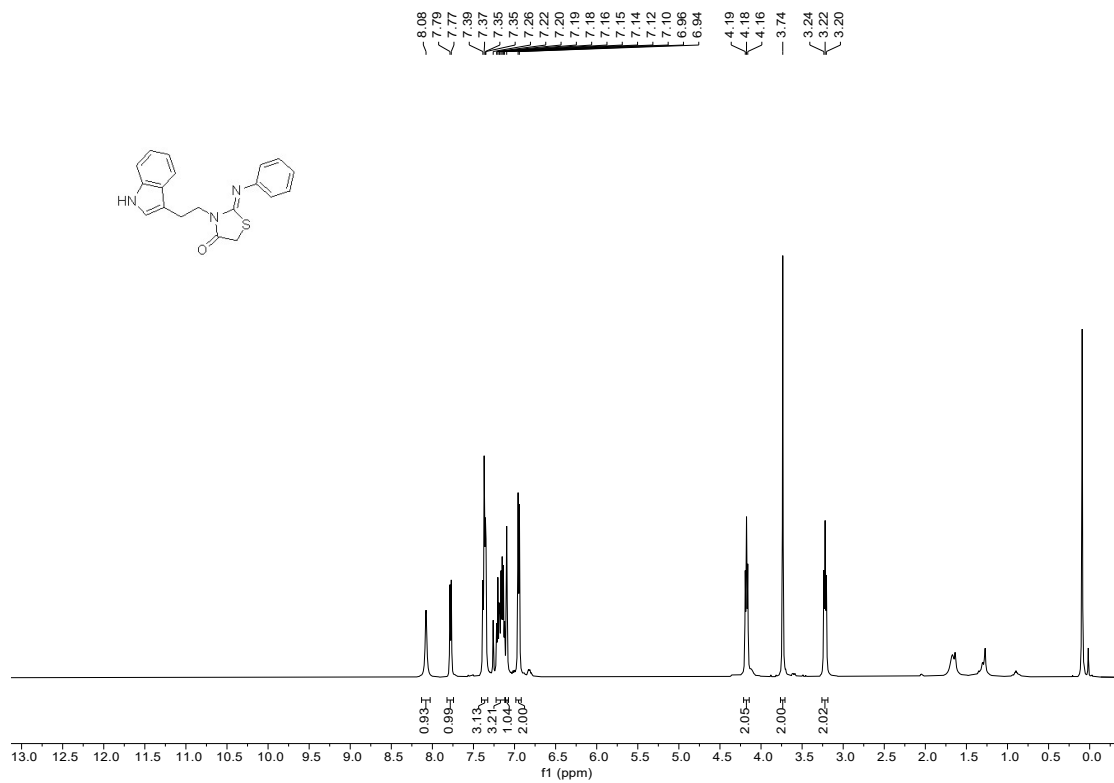

<sup>1</sup>H NMR of **4zf** in CDCl<sub>3</sub> (500 MHz)

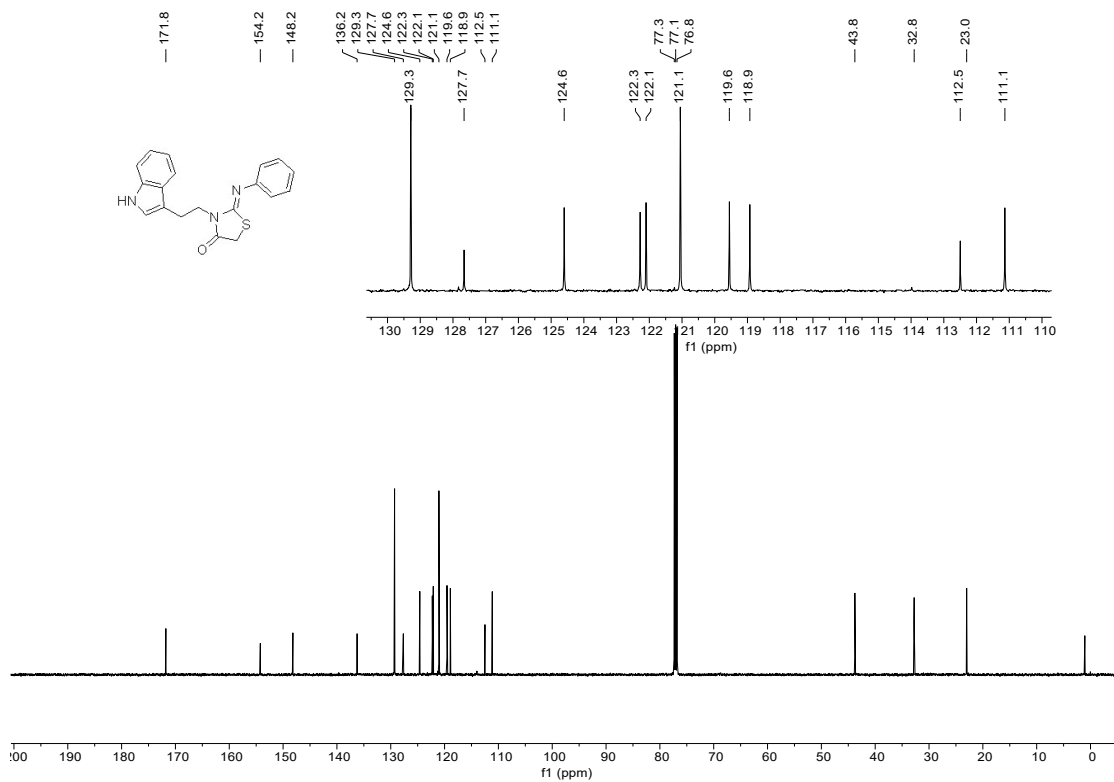

<sup>13</sup>C{<sup>1</sup>H} NMR of **4zf** in CDCl<sub>3</sub> (126 MHz)



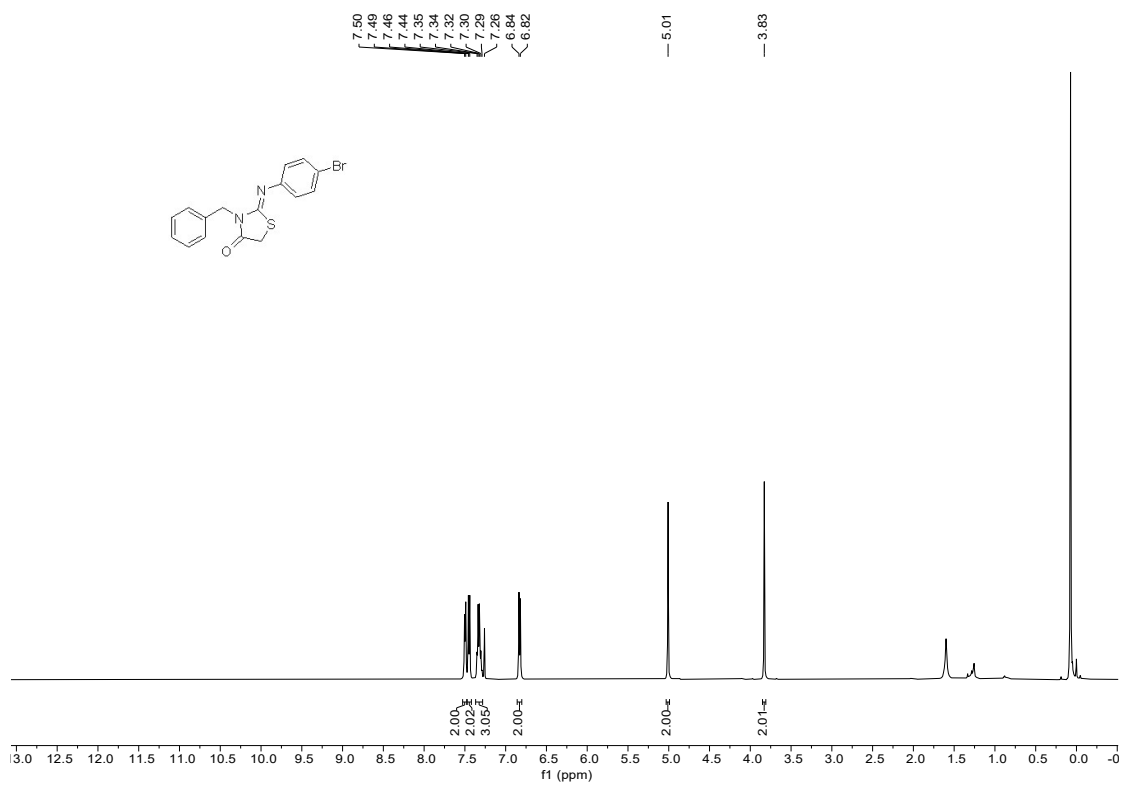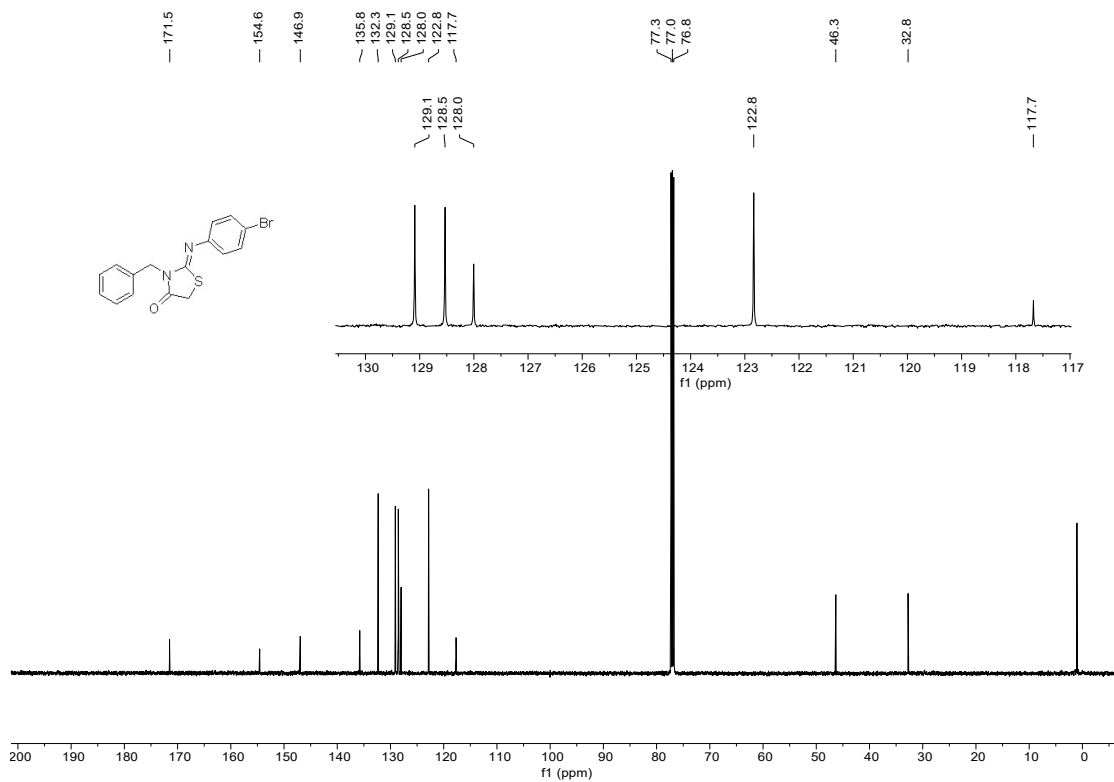

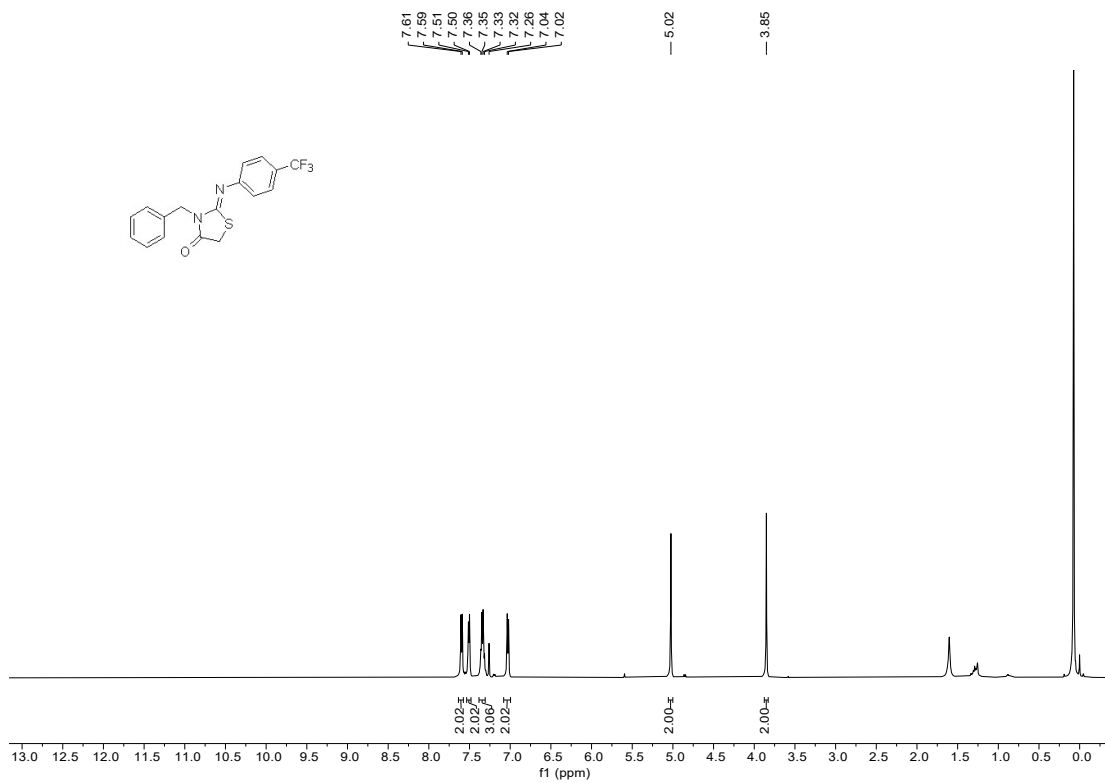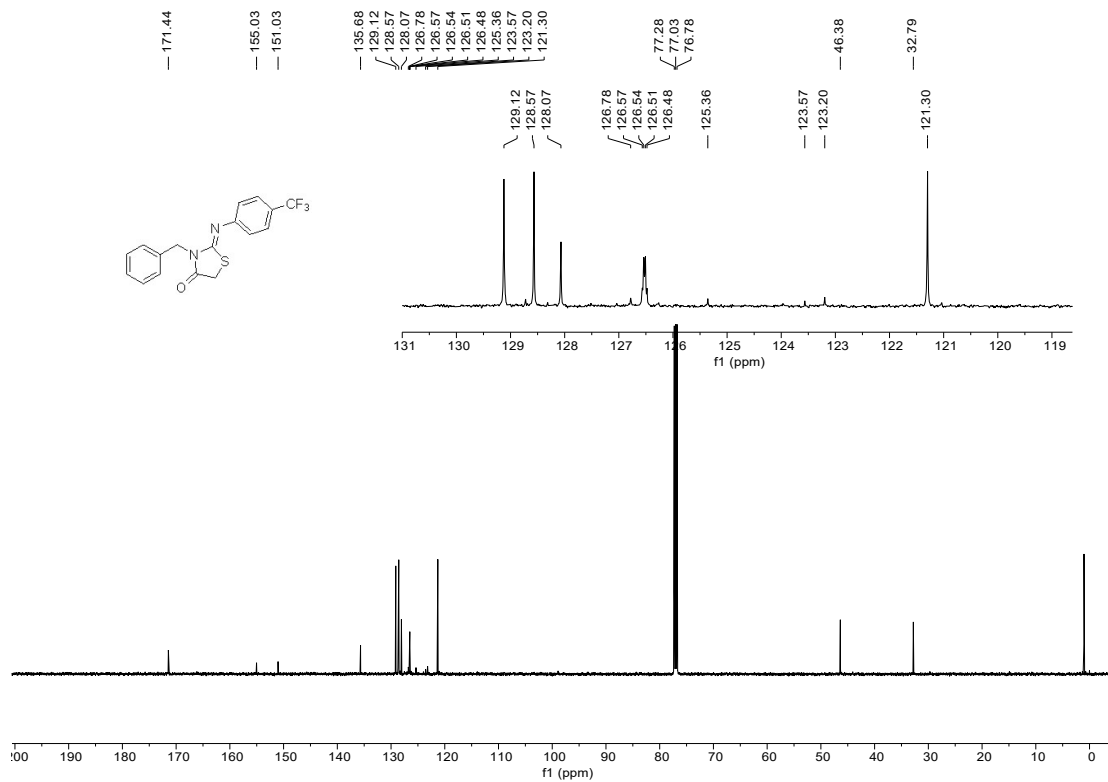

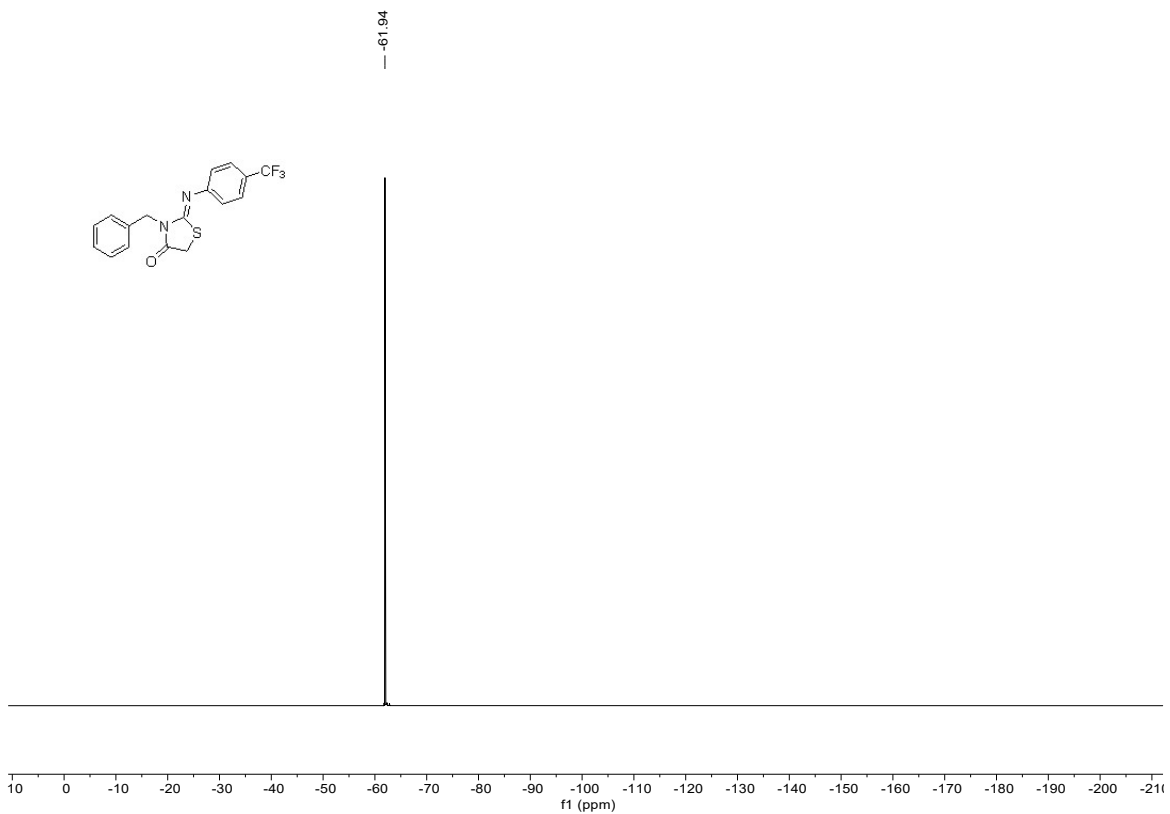

$^{19}\text{F}$  NMR of **5b** in  $\text{CDCl}_3$  (471 MHz)

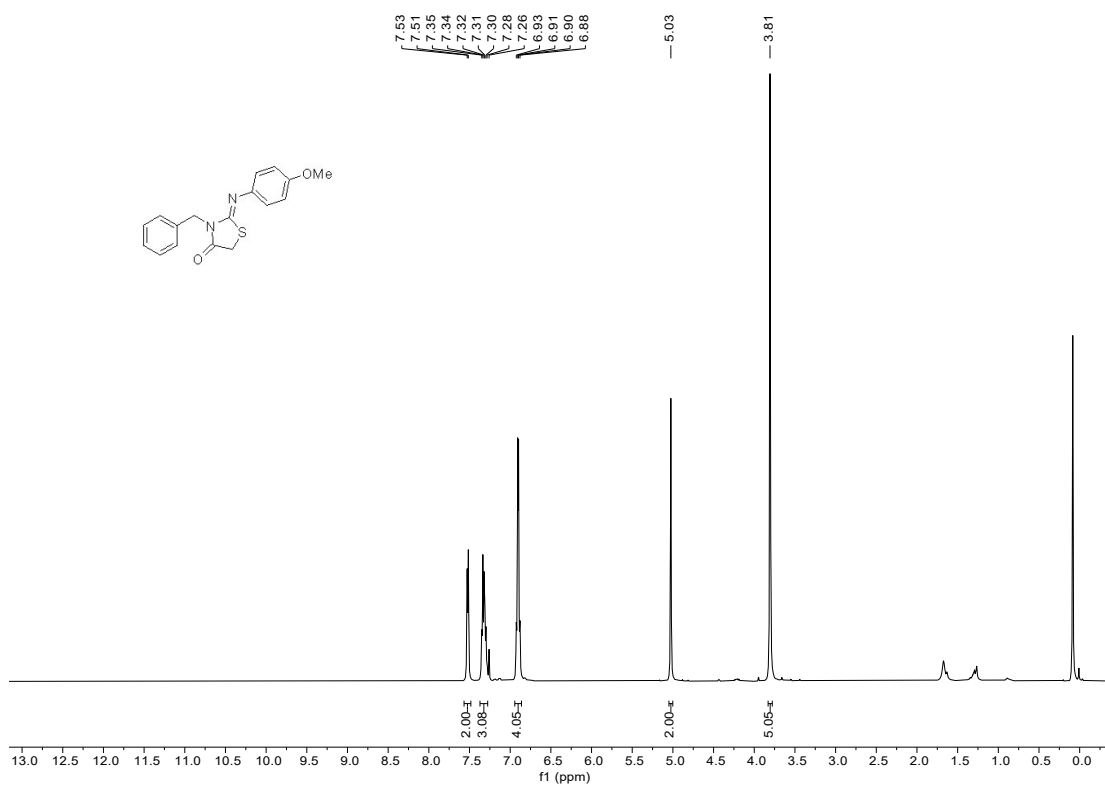

$^1\text{H}$  NMR of **5c** in  $\text{CDCl}_3$  (500 MHz)

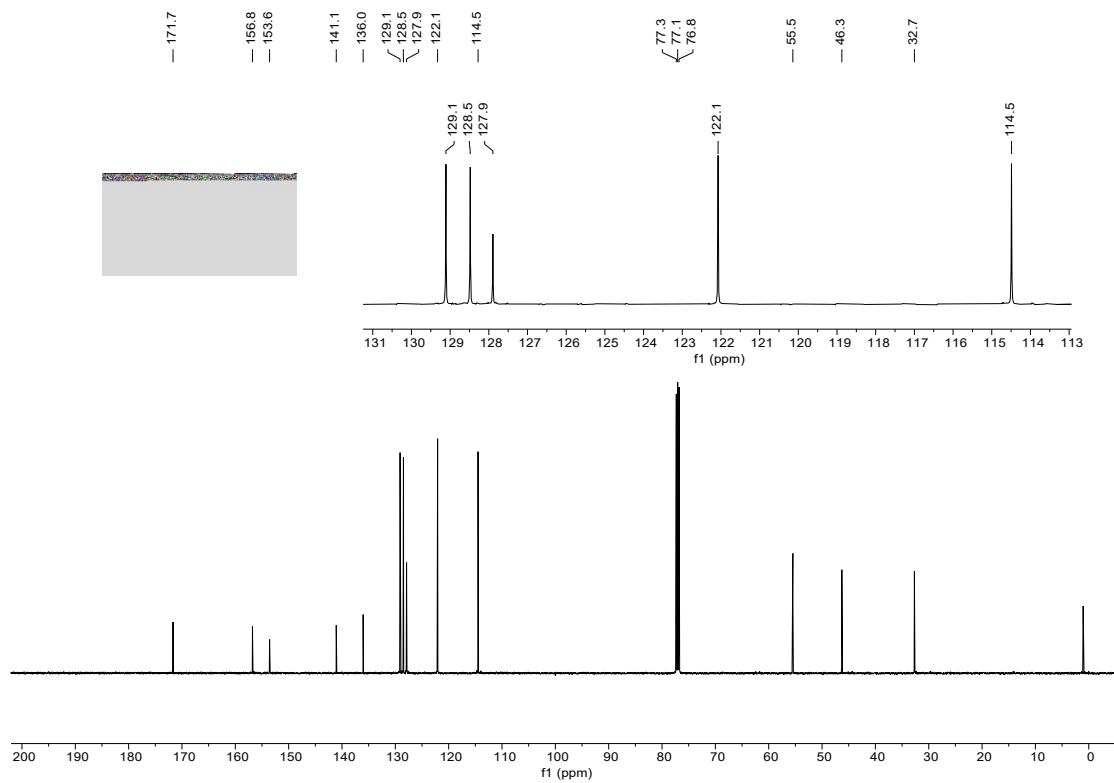

$^{13}\text{C}\{^1\text{H}\}$  NMR of **5c** in  $\text{CDCl}_3$  (126 MHz)

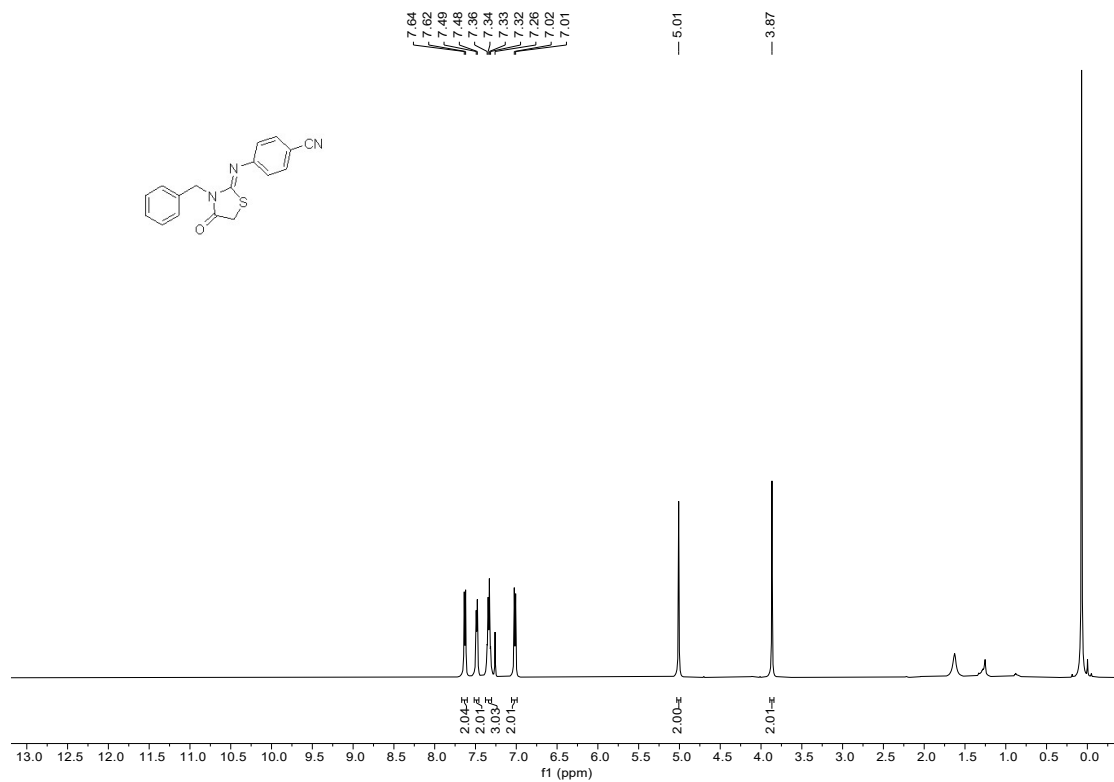

$^1\text{H}$  NMR of **5d** in  $\text{CDCl}_3$  (500 MHz)

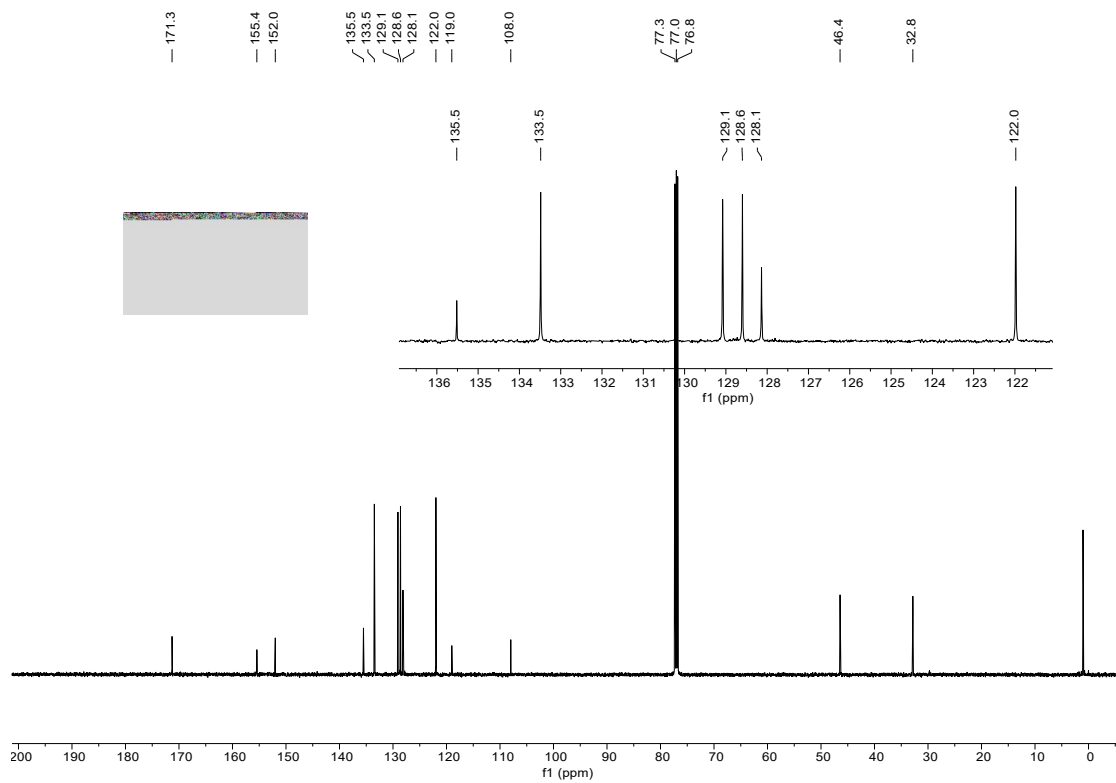

$^{13}\text{C}\{^1\text{H}\}$  NMR of **5d** in  $\text{CDCl}_3$  (126 MHz)

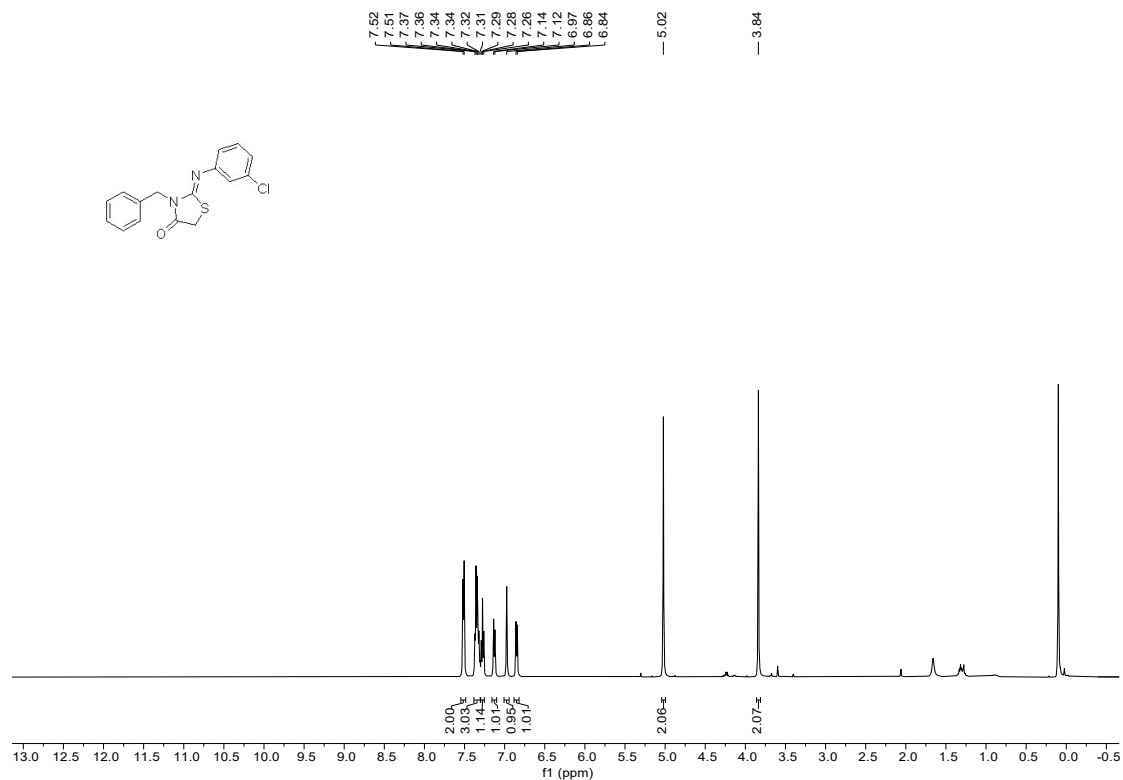

$^1\text{H}$  NMR of **5e** in  $\text{CDCl}_3$  (500 MHz)

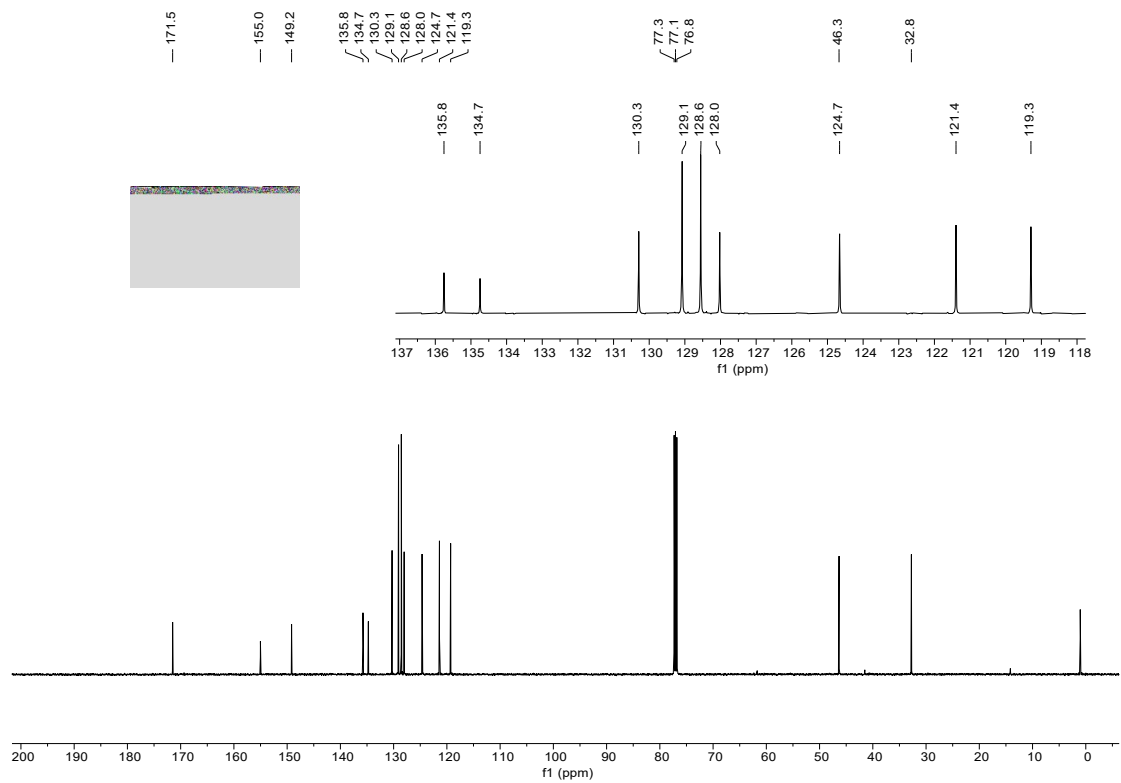

$^{13}\text{C}\{^1\text{H}\}$  NMR of **5e** in  $\text{CDCl}_3$  (126 MHz)

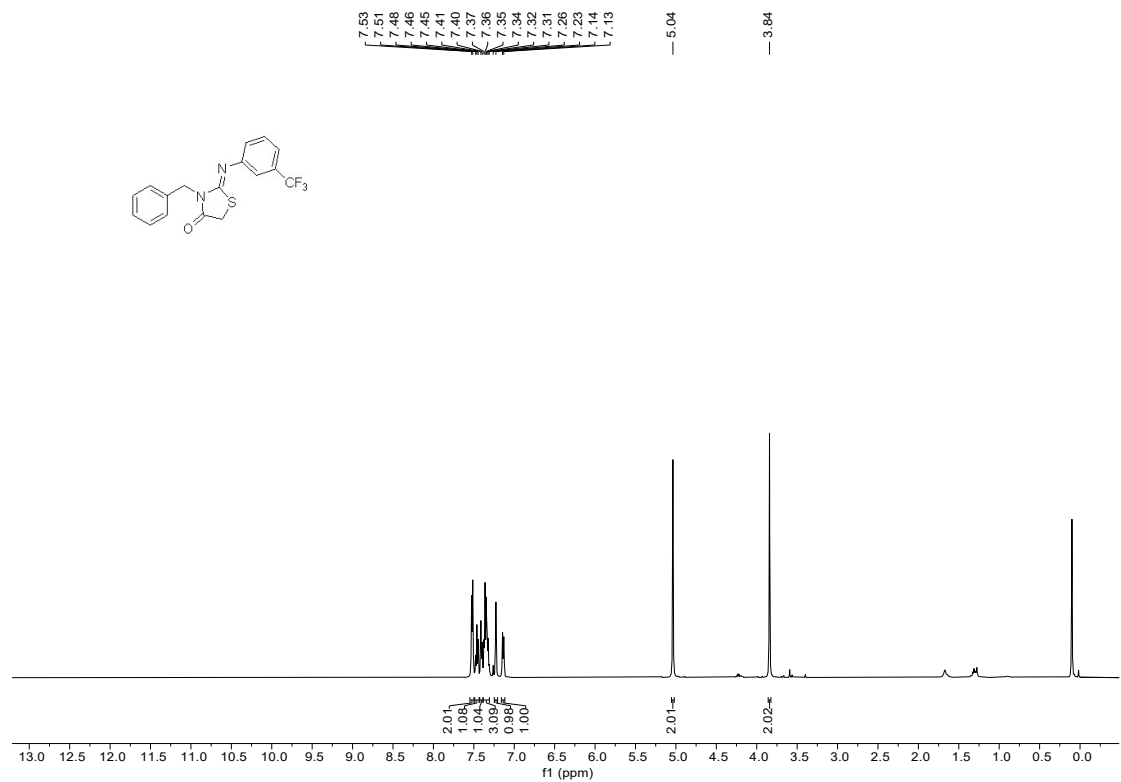

$^1\text{H}$  NMR of **5f** in  $\text{CDCl}_3$  (500 MHz)

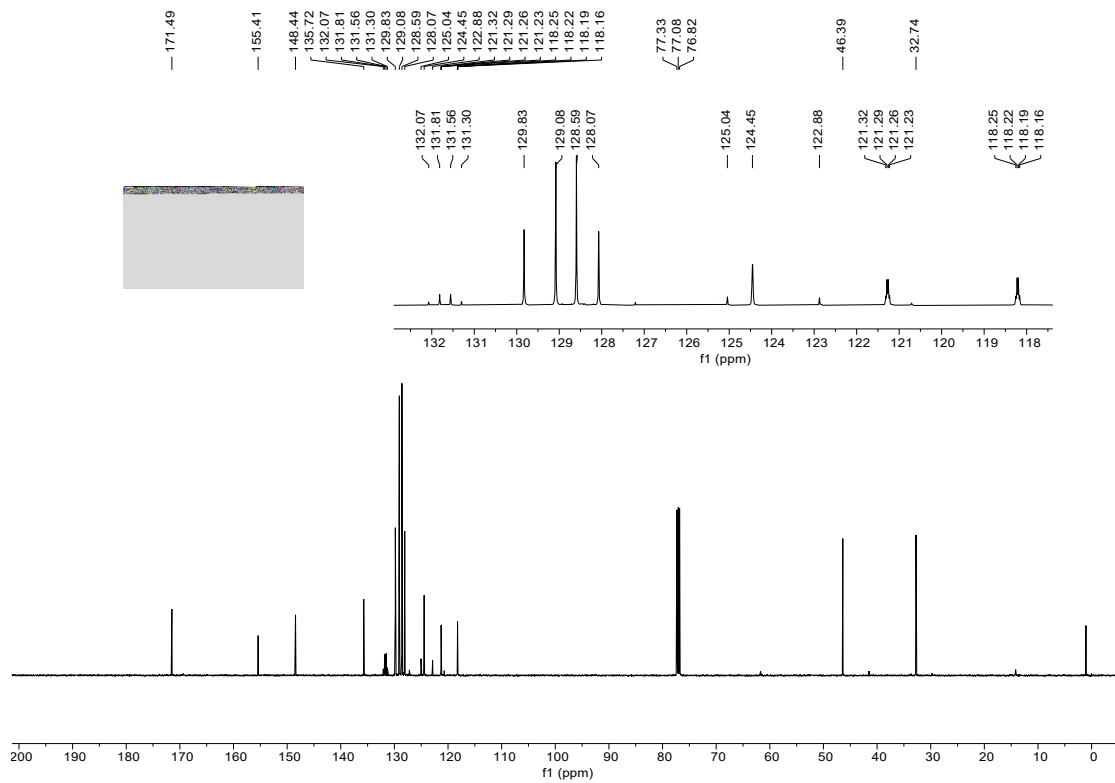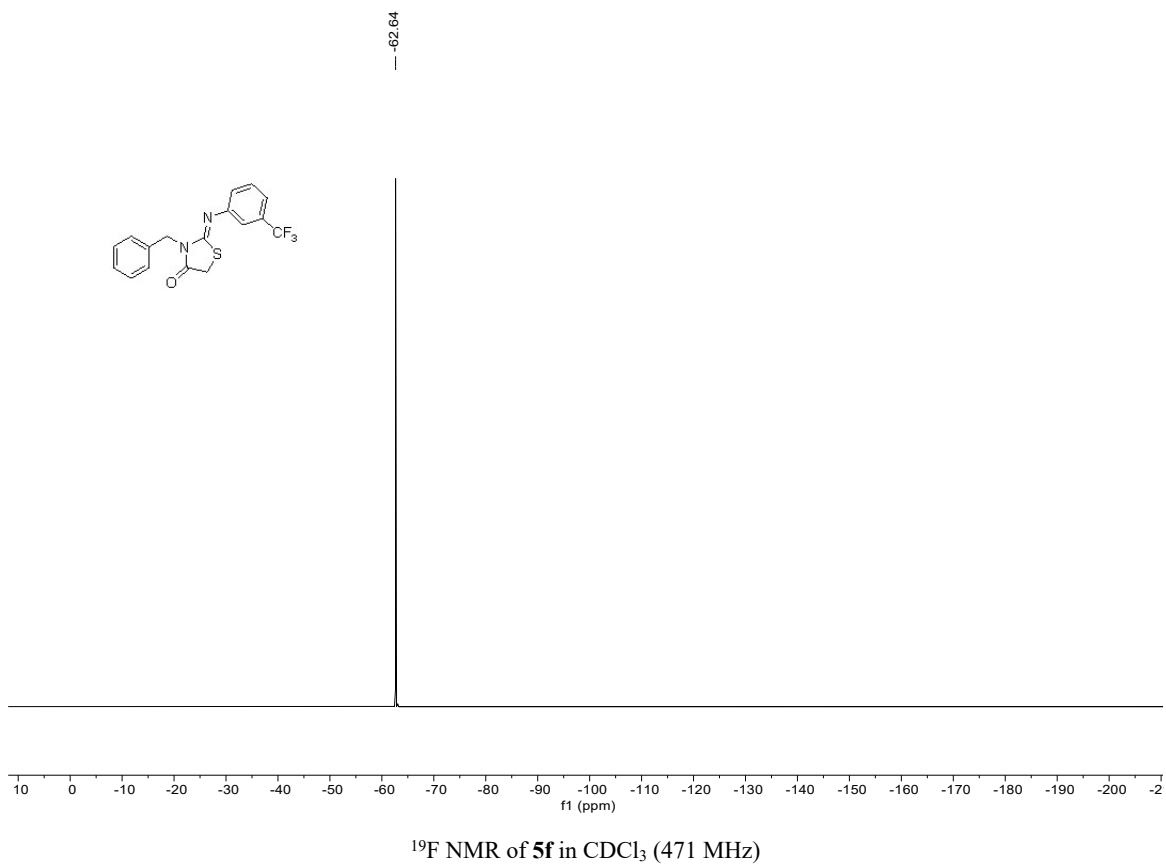

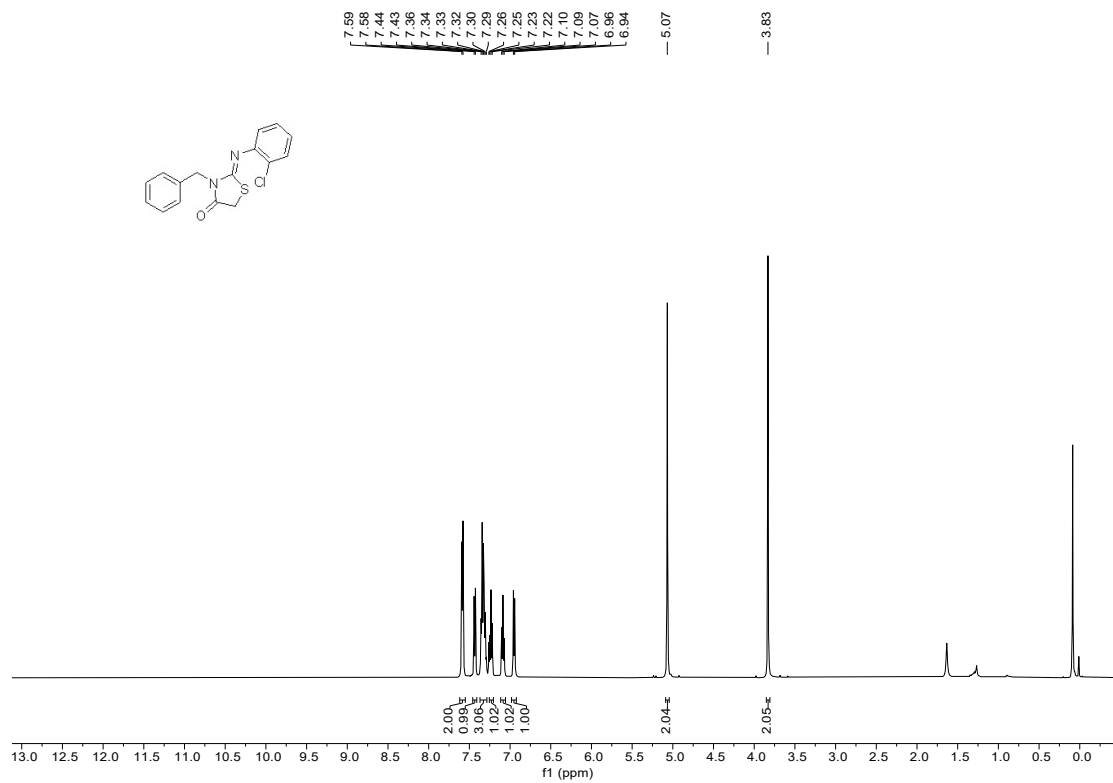

$^1\text{H}$  NMR of **5g** in  $\text{CDCl}_3$  (500 MHz)

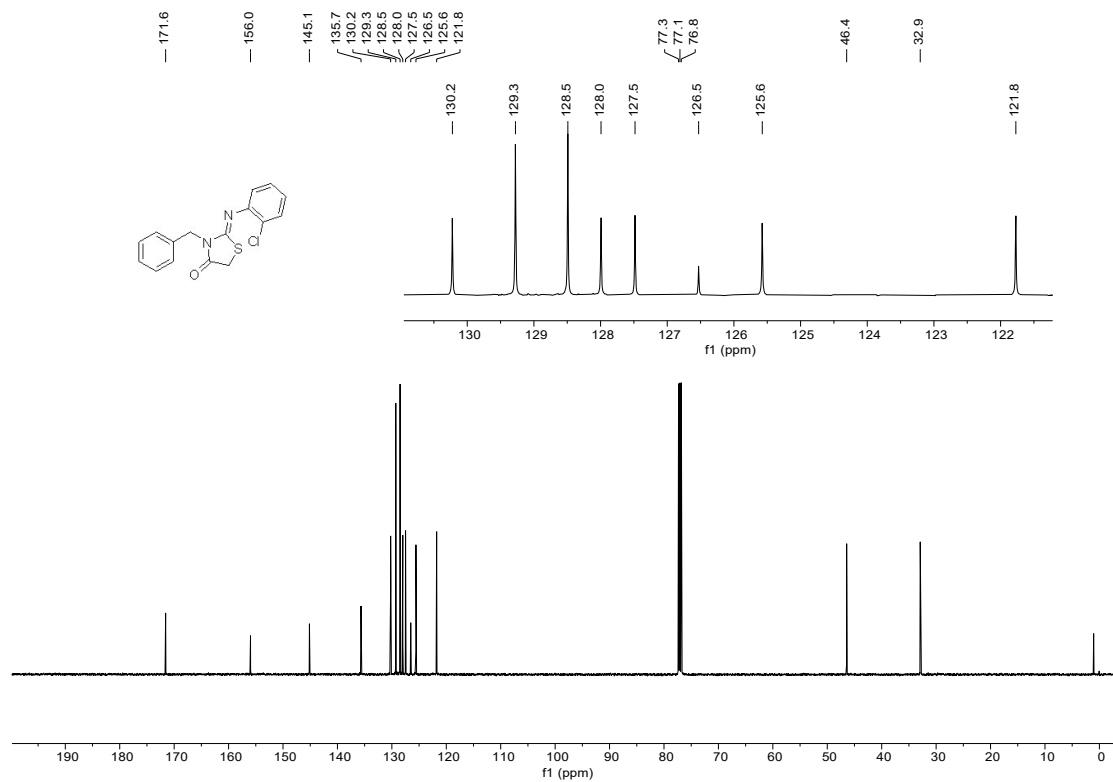

$^{13}\text{C}\{^1\text{H}\}$  NMR of **5g** in  $\text{CDCl}_3$  (126 MHz)



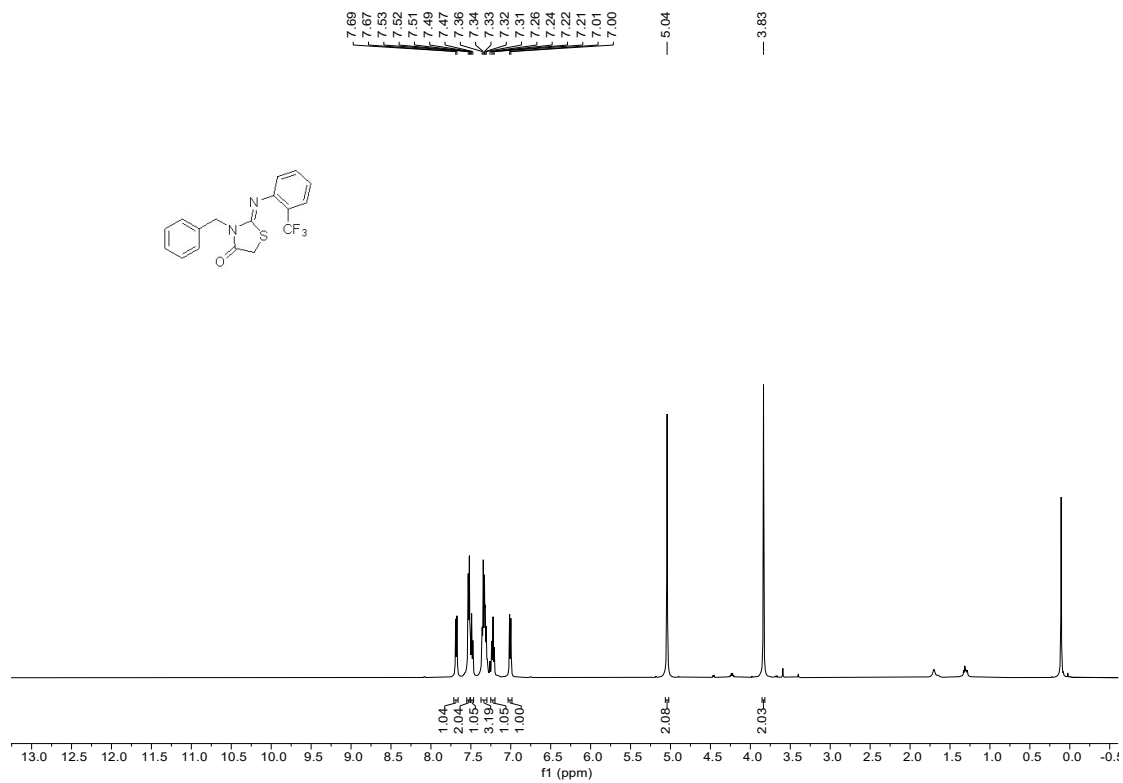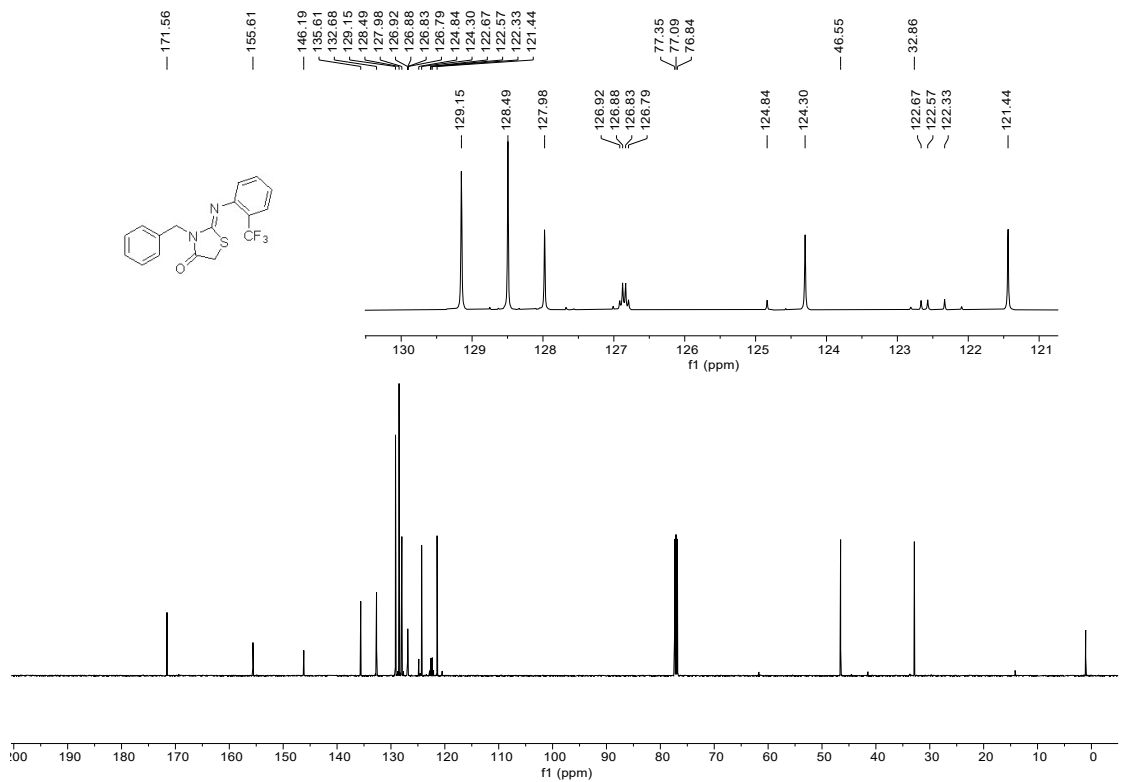

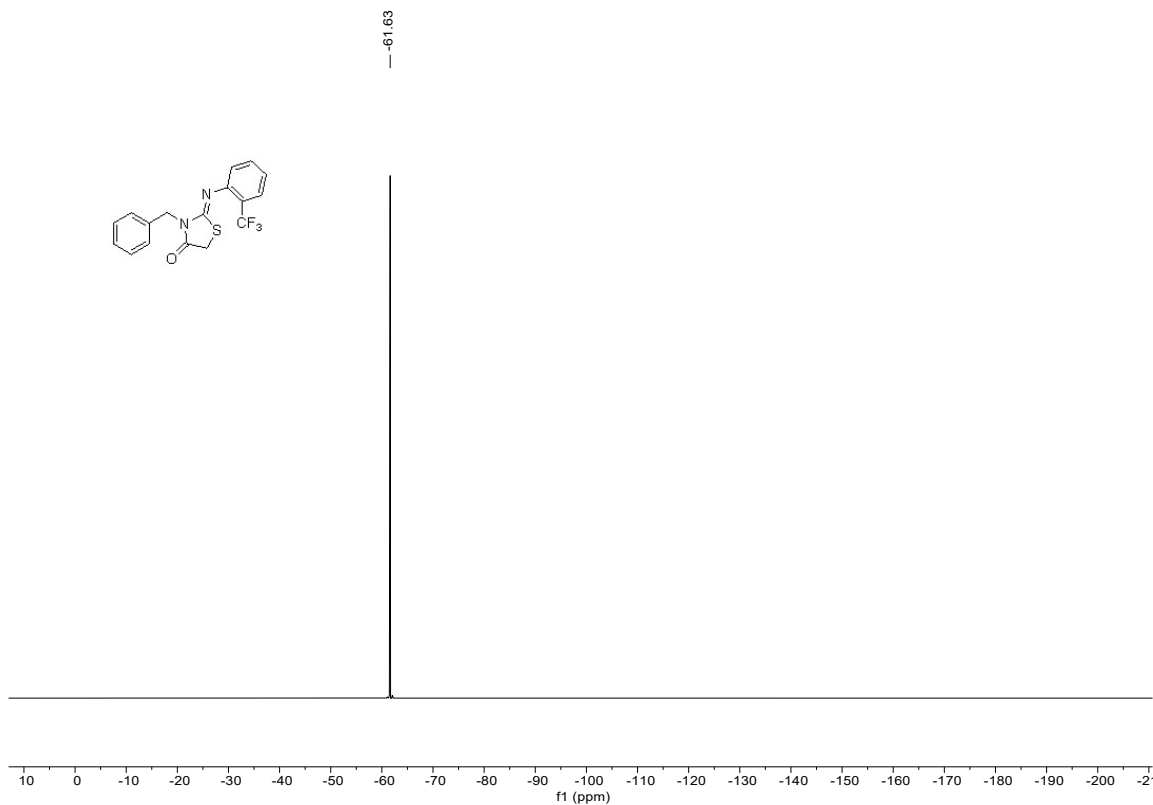

$^{19}\text{F}$  NMR of **5h** in  $\text{CDCl}_3$  (471 MHz)

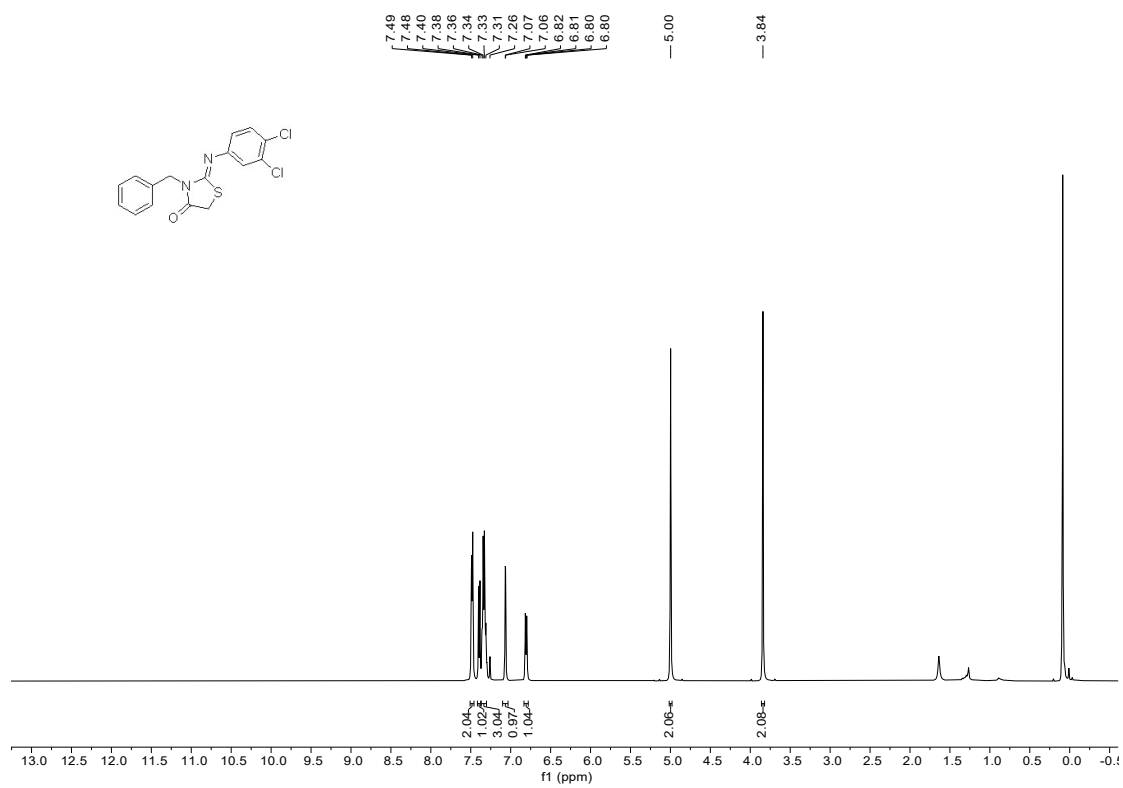

$^1\text{H}$  NMR of **5i** in  $\text{CDCl}_3$  (500 MHz)

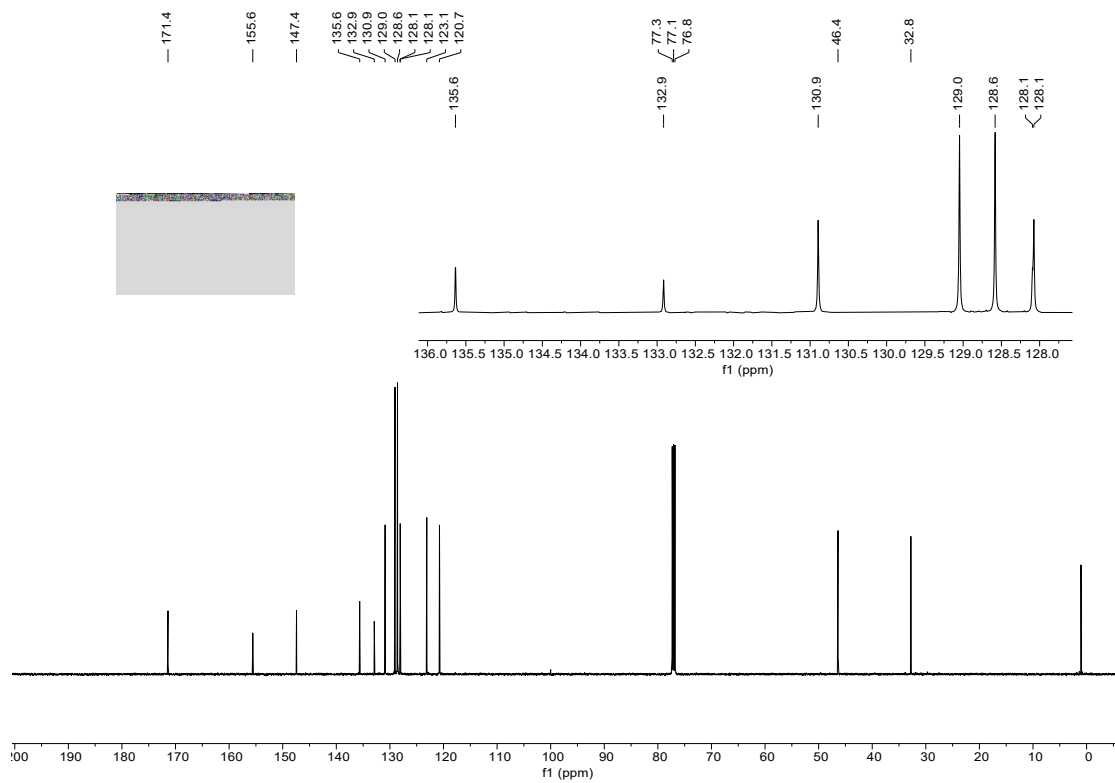

<sup>13</sup>C{<sup>1</sup>H} NMR of **5i** in CDCl<sub>3</sub> (126 MHz)

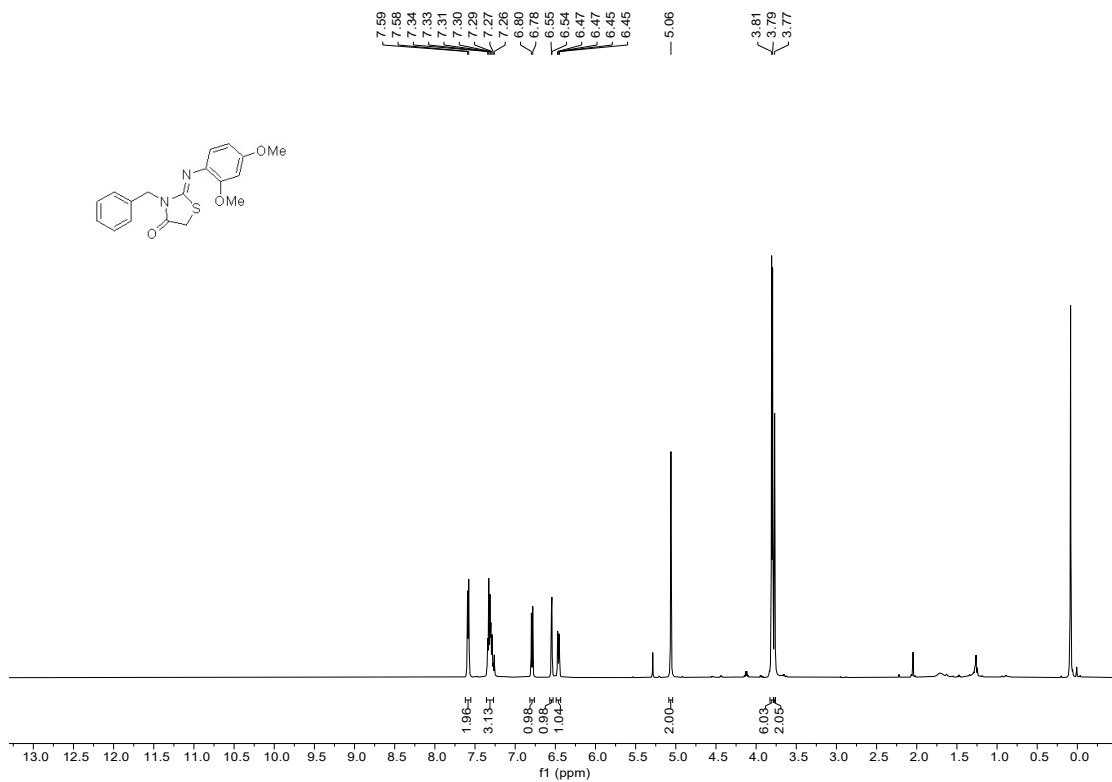

<sup>1</sup>H NMR of **5j** in CDCl<sub>3</sub> (500 MHz)

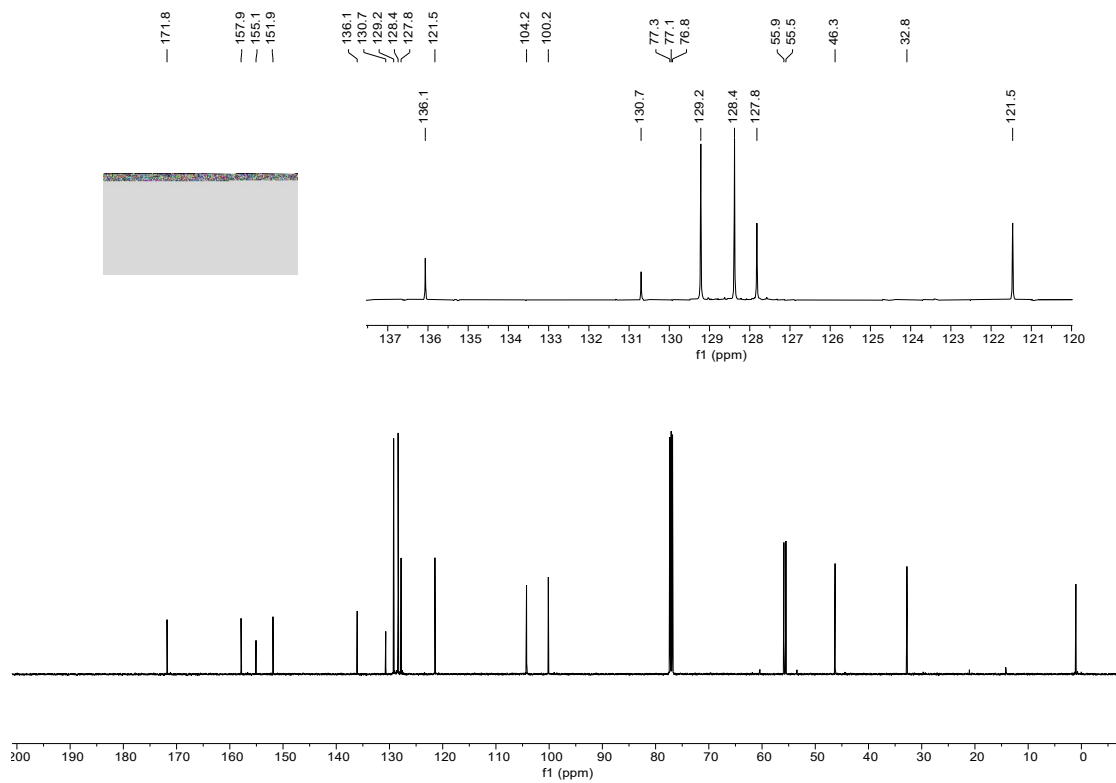

<sup>13</sup>C{<sup>1</sup>H} NMR of **5j** in CDCl<sub>3</sub> (126 MHz)

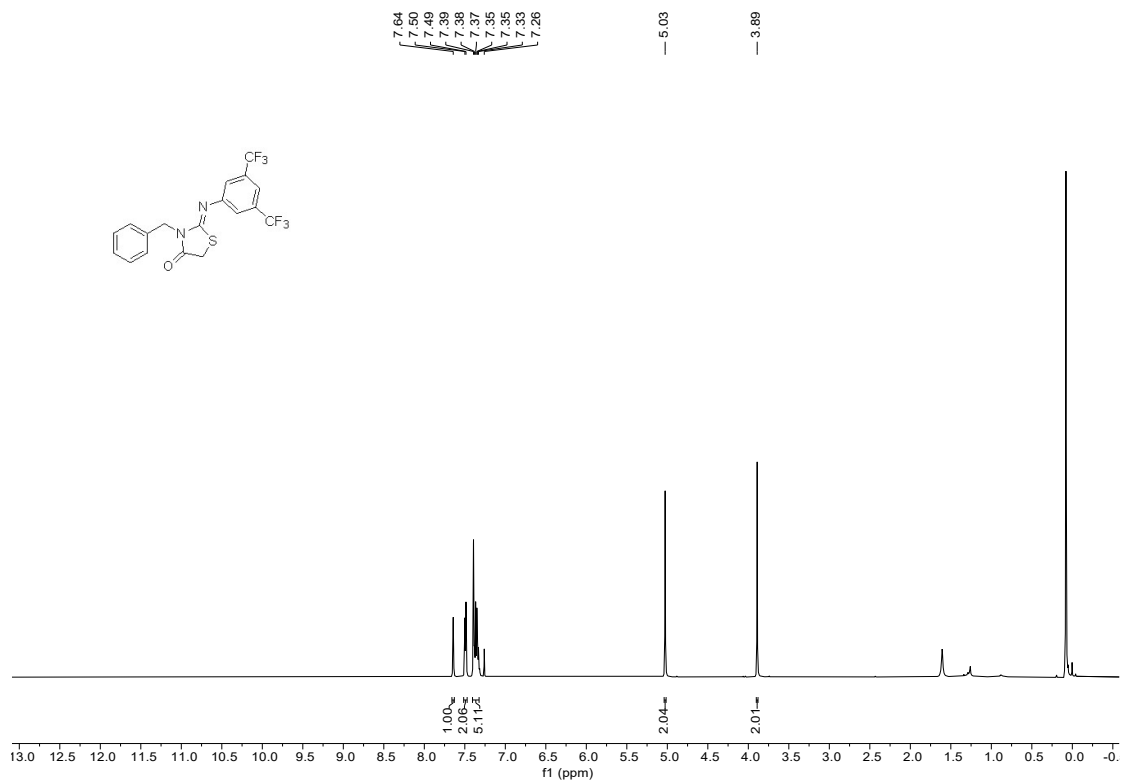

<sup>1</sup>H NMR of **5k** in CDCl<sub>3</sub> (500 MHz)

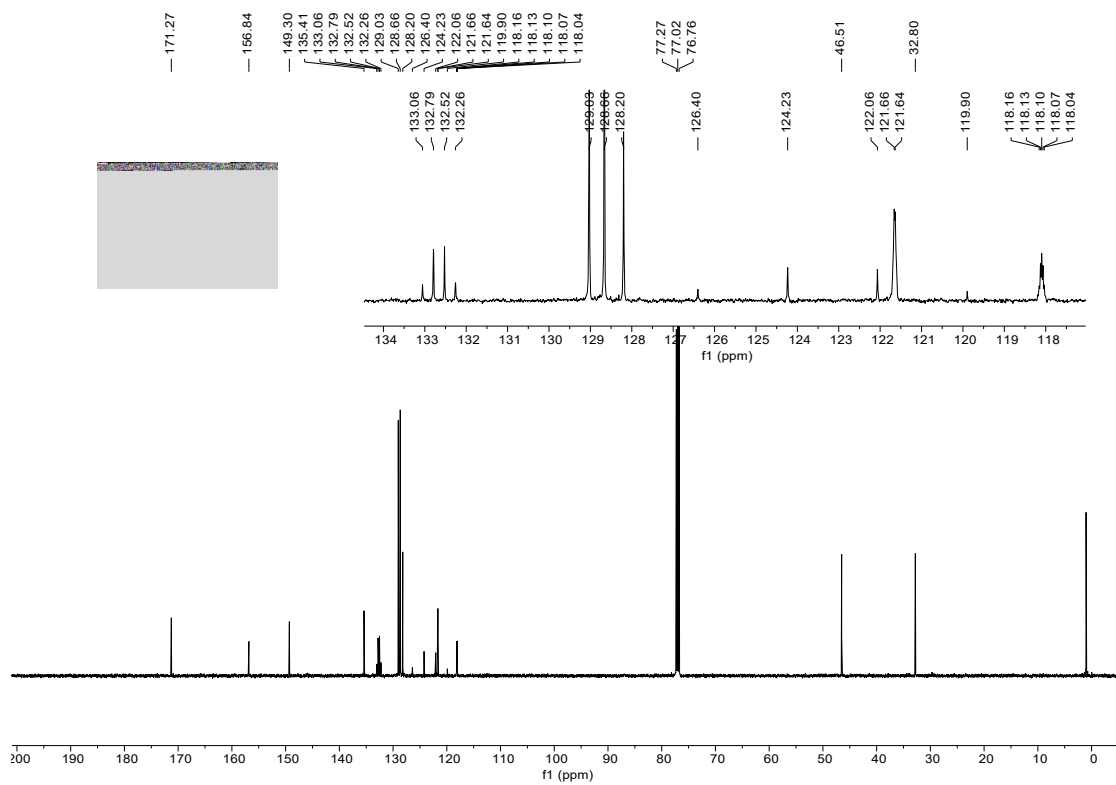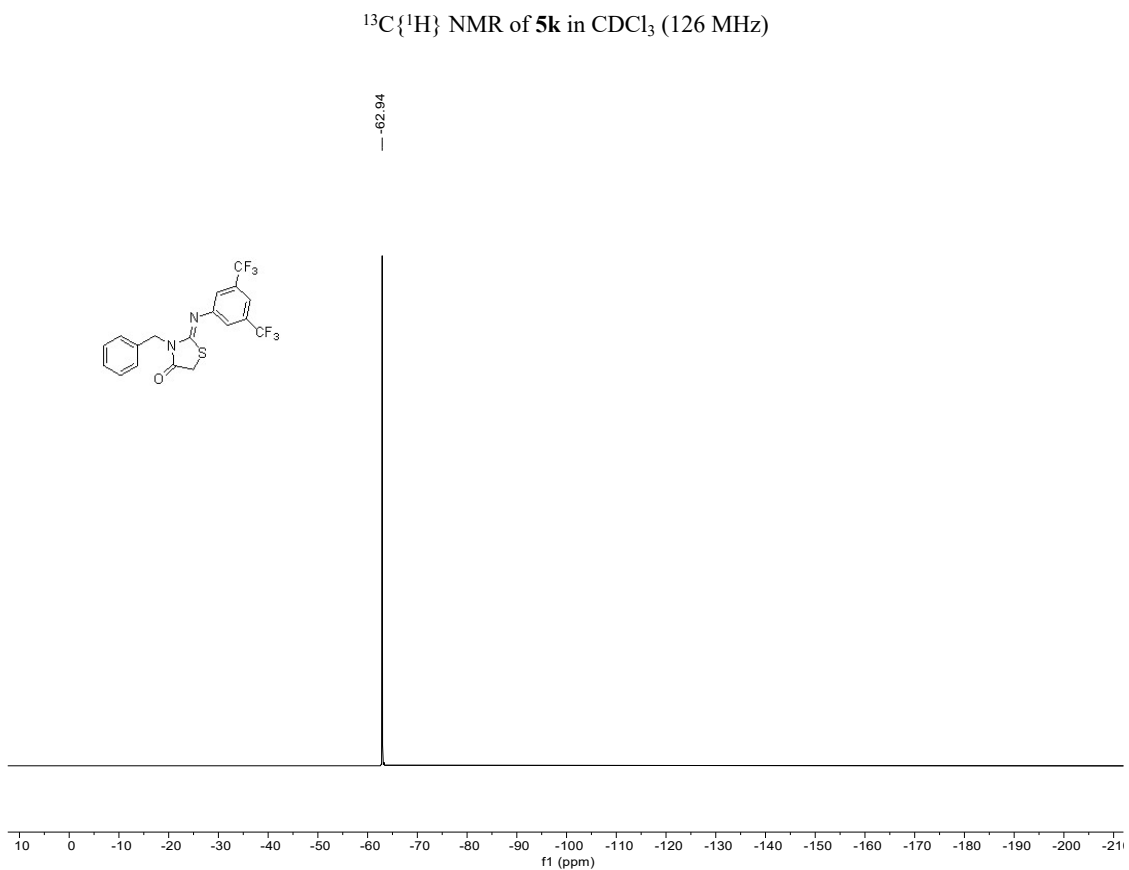

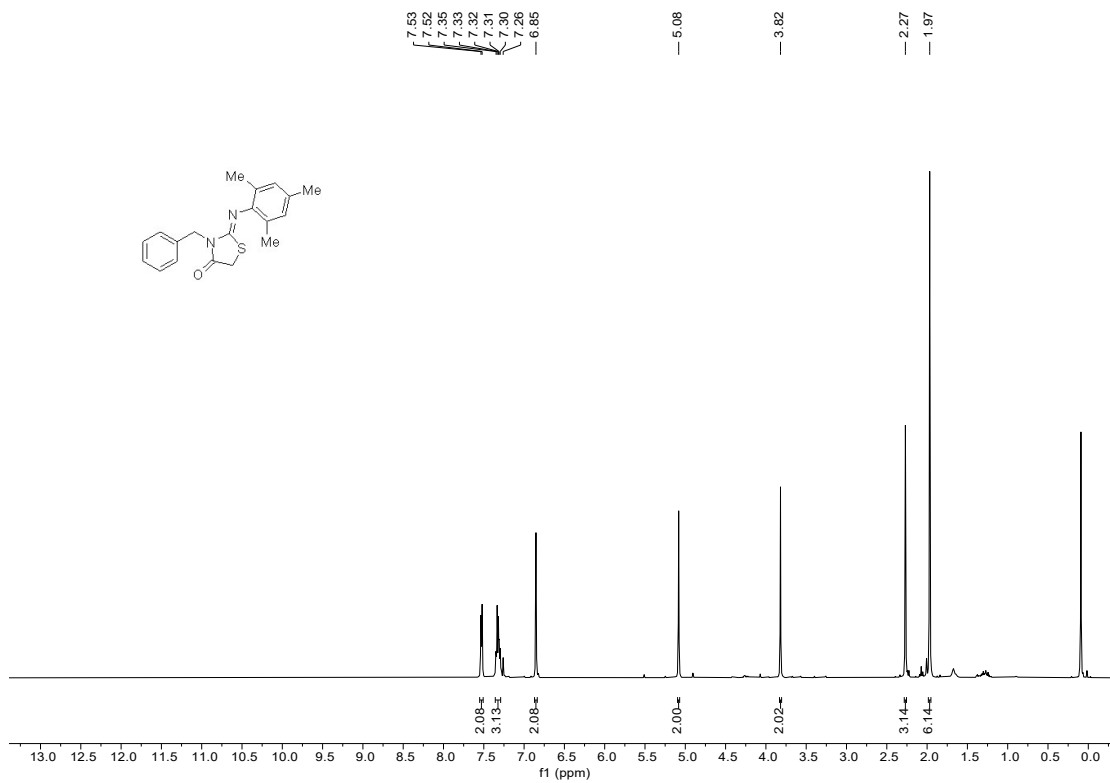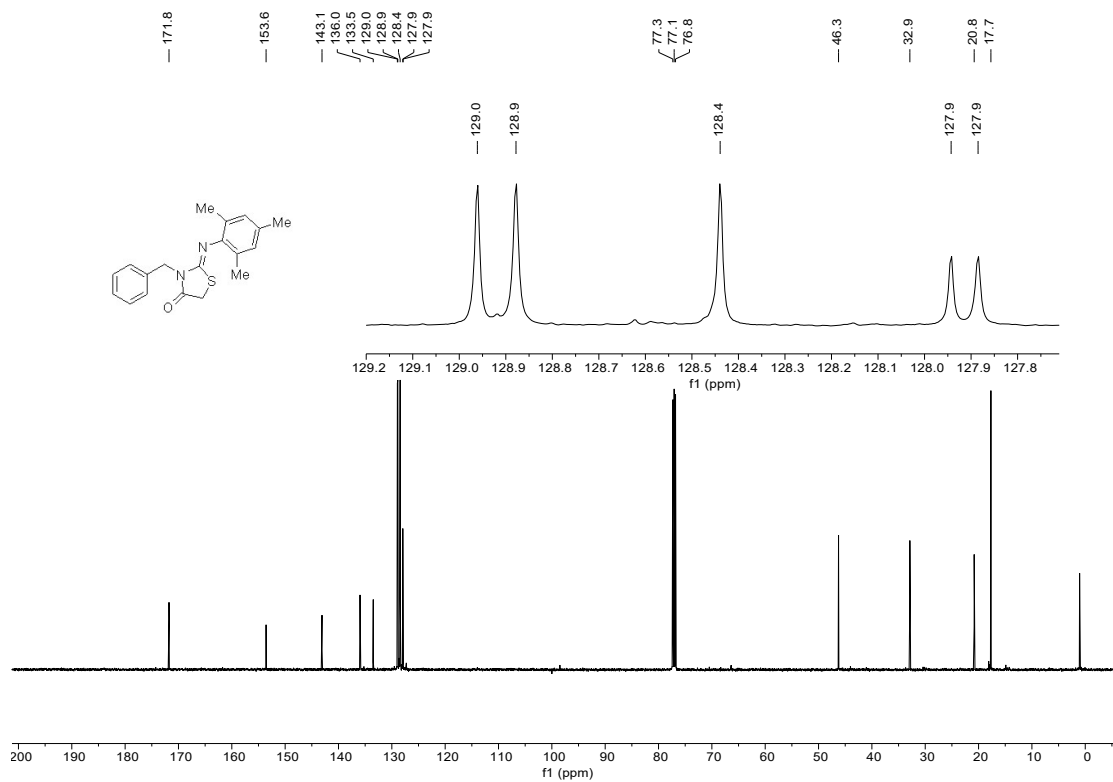

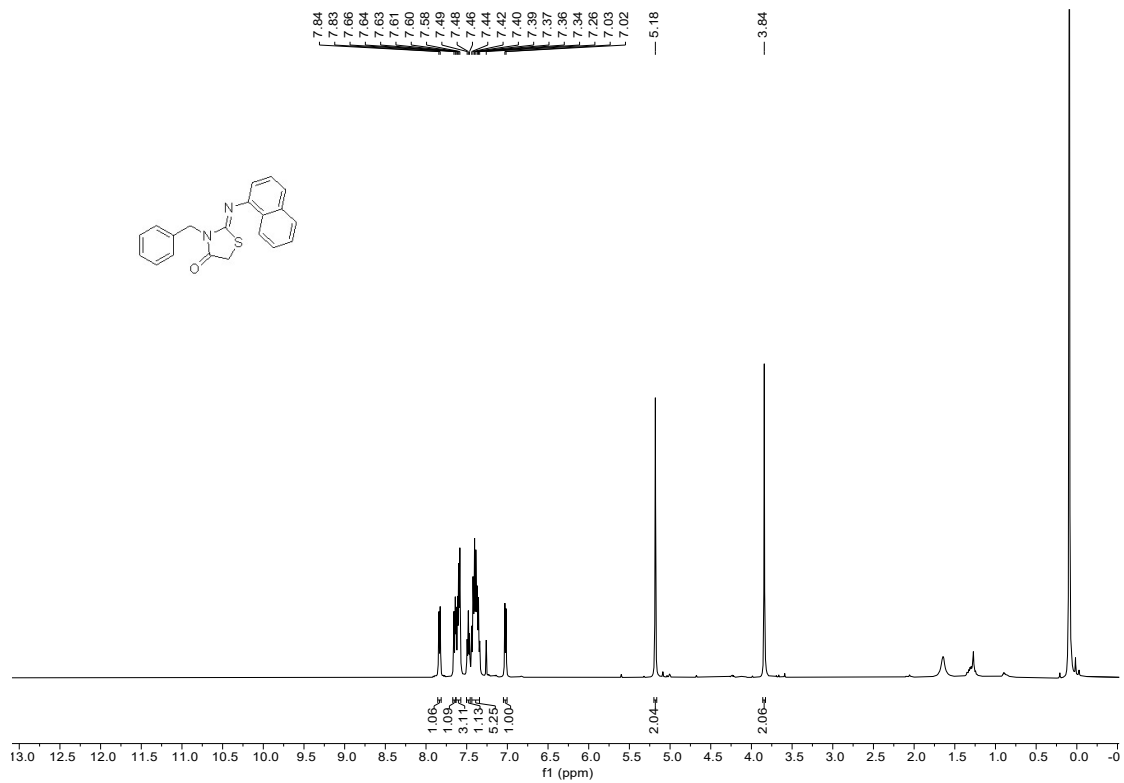

$^1\text{H}$  NMR of **5m** in  $\text{CDCl}_3$  (500 MHz)

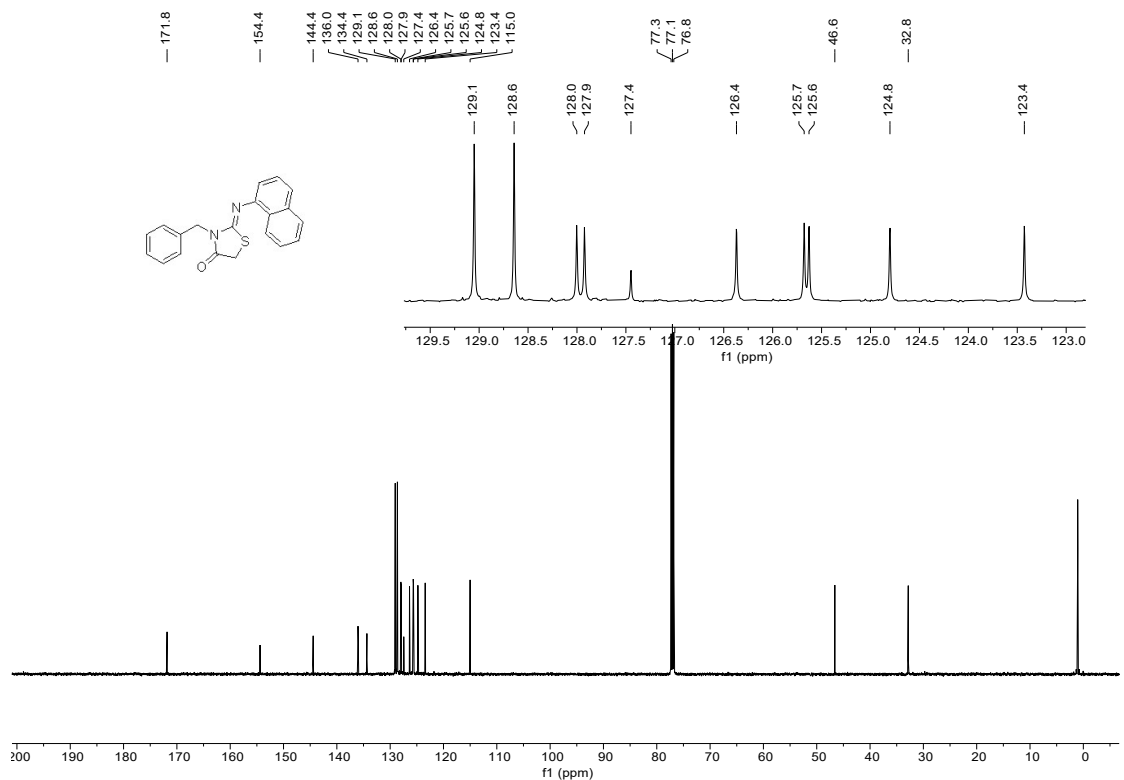

$^{13}\text{C}$   $\{^1\text{H}\}$  NMR of **5m** in  $\text{CDCl}_3$  (126 MHz)

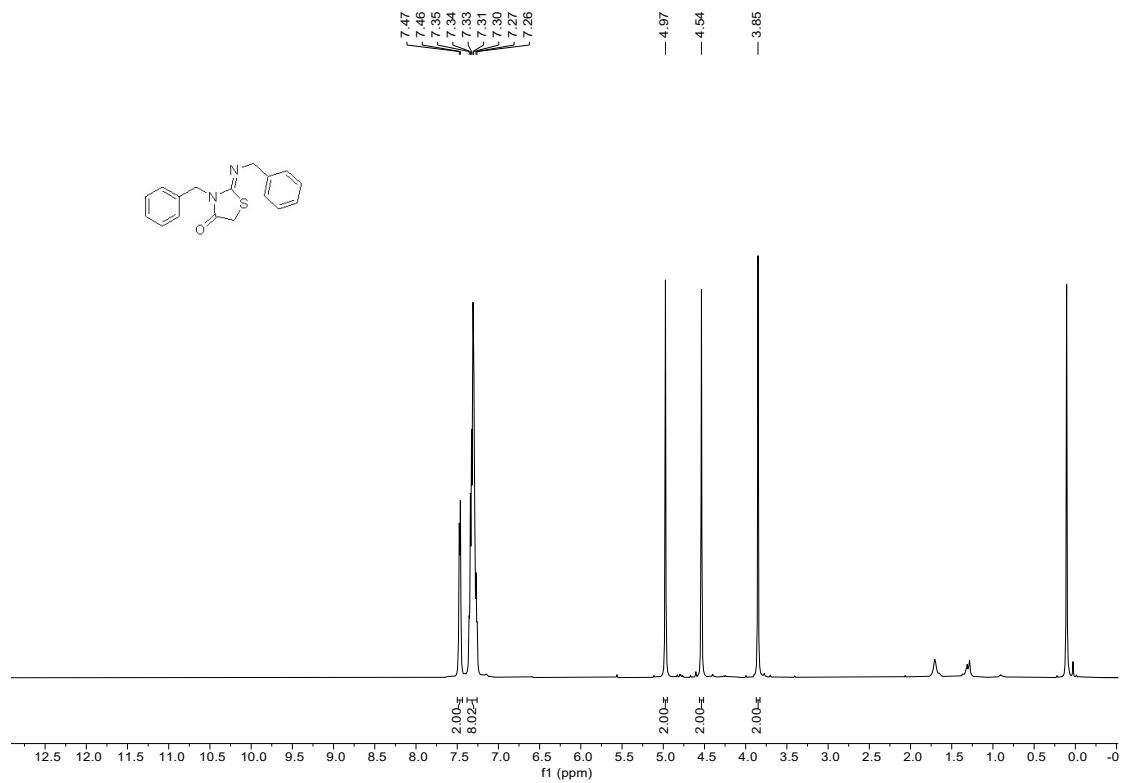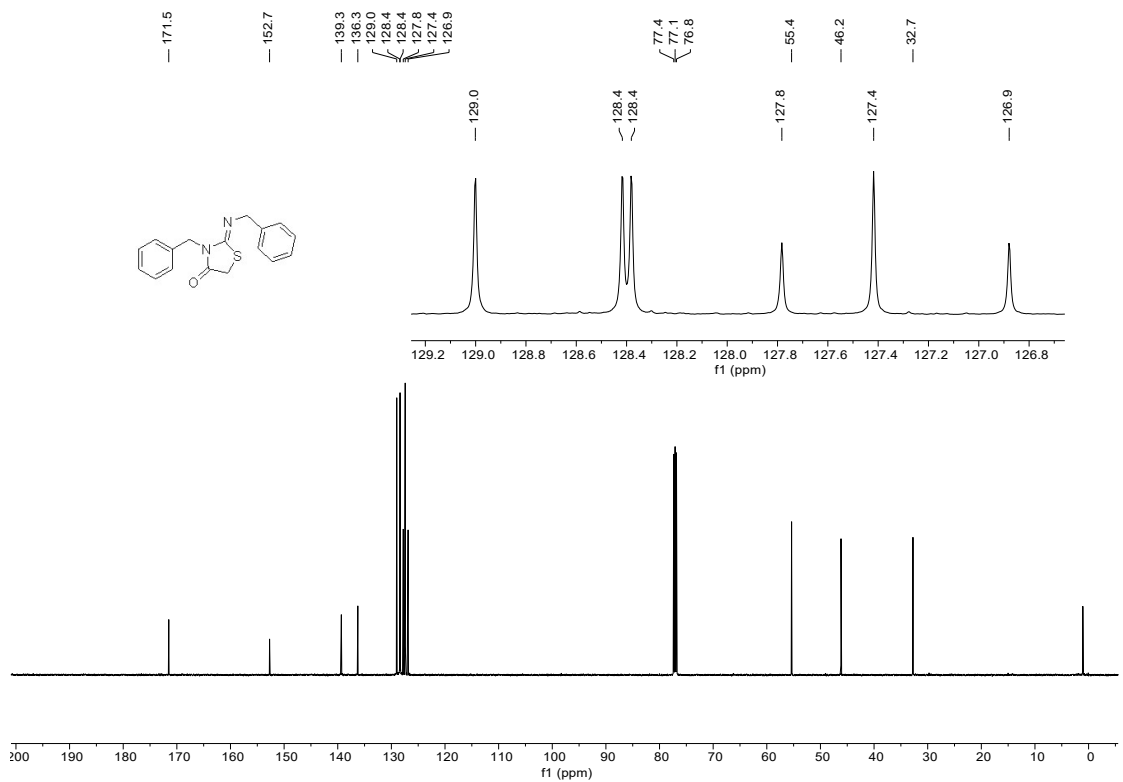



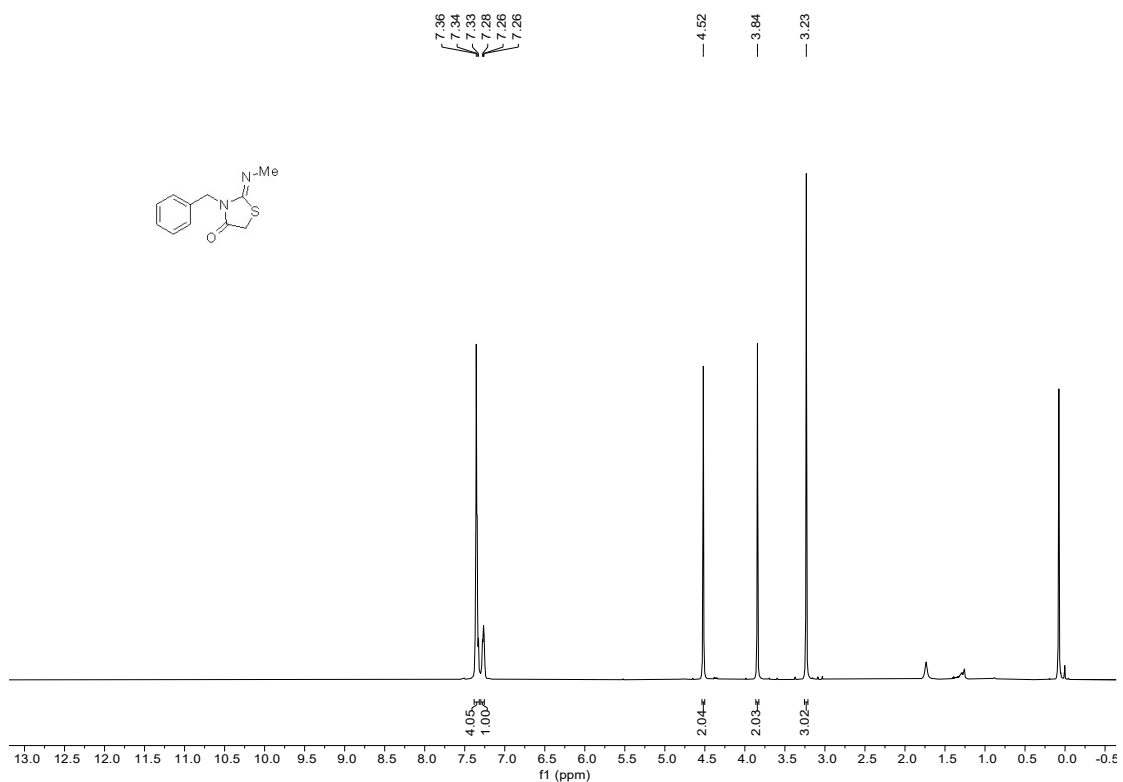

$^1\text{H}$  NMR of **5o** in  $\text{CDCl}_3$  (500 MHz)

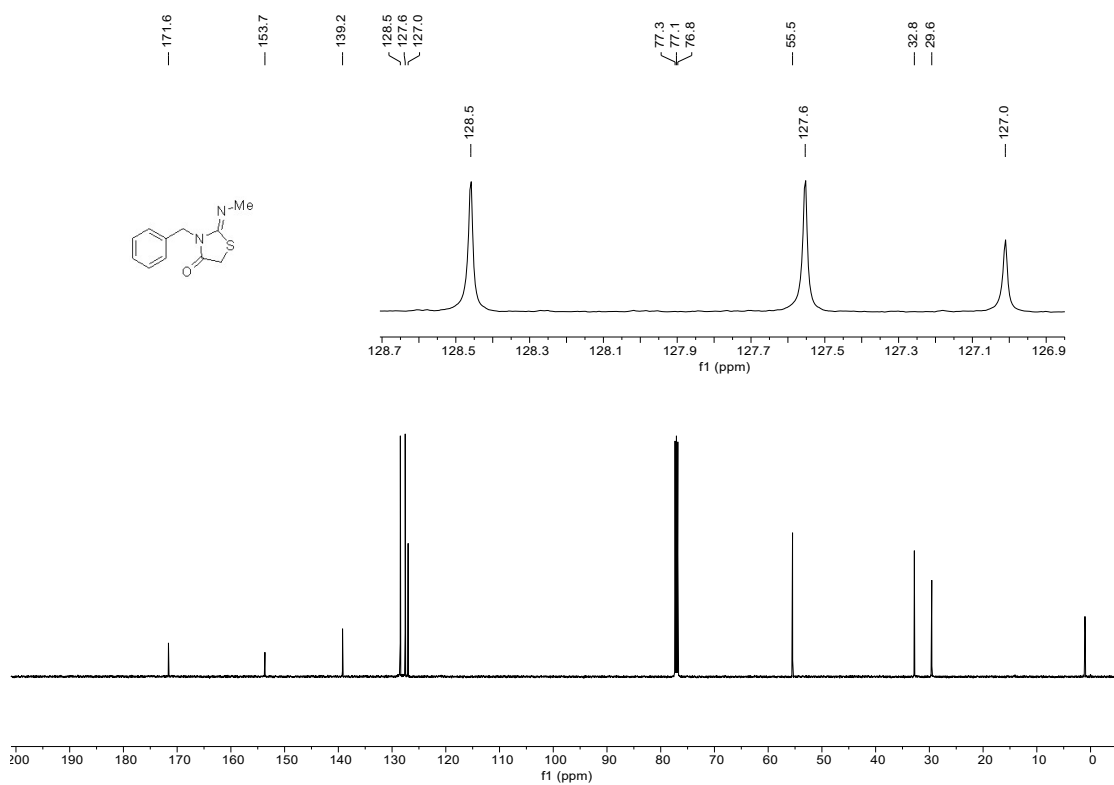

$^{13}\text{C}\{^1\text{H}\}$  NMR of **5o** in  $\text{CDCl}_3$  (126 MHz)

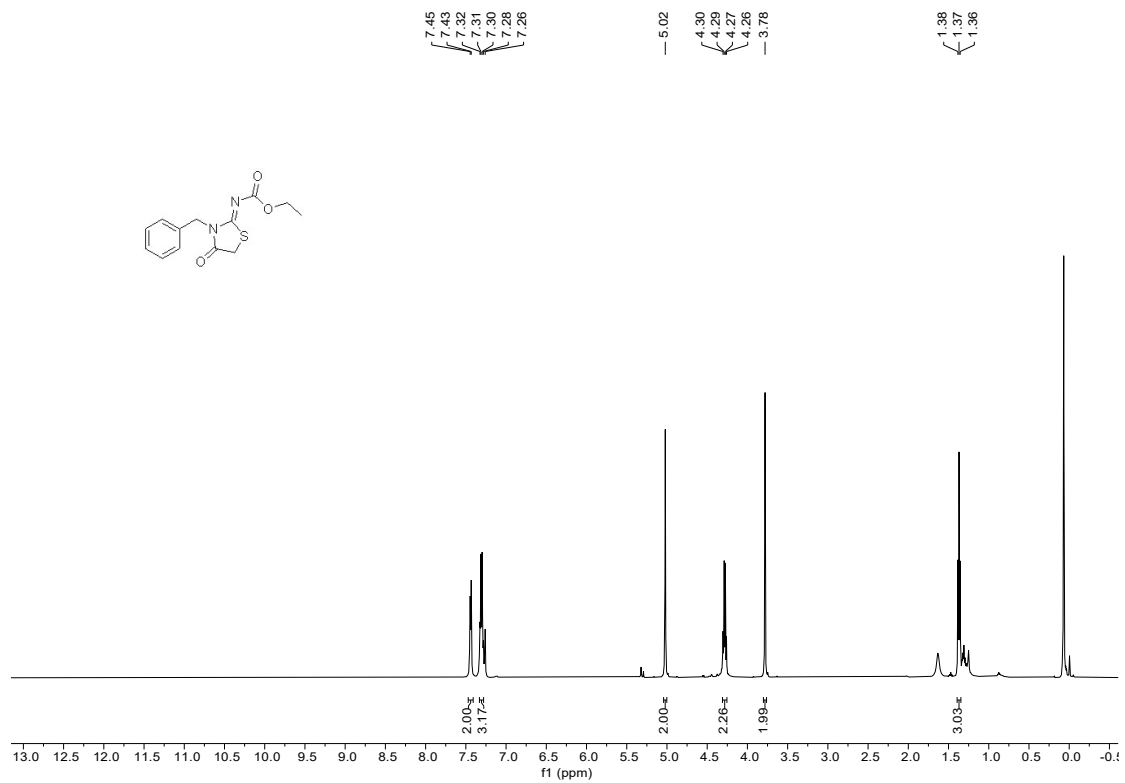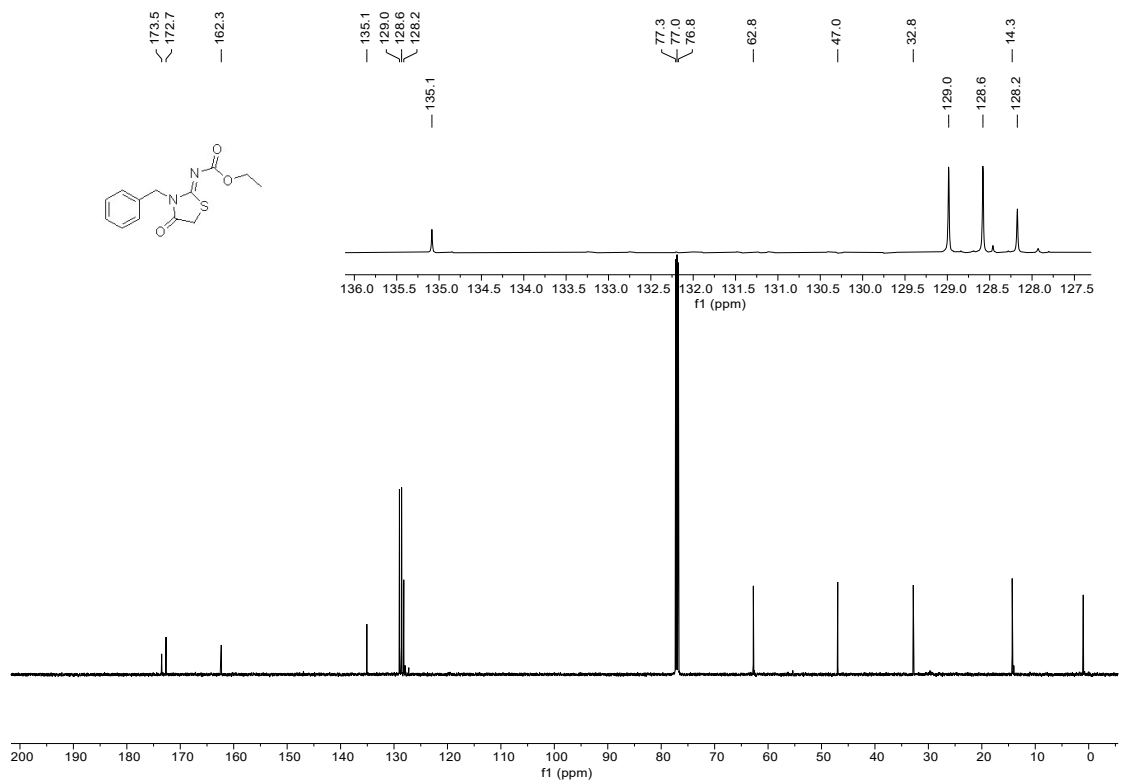

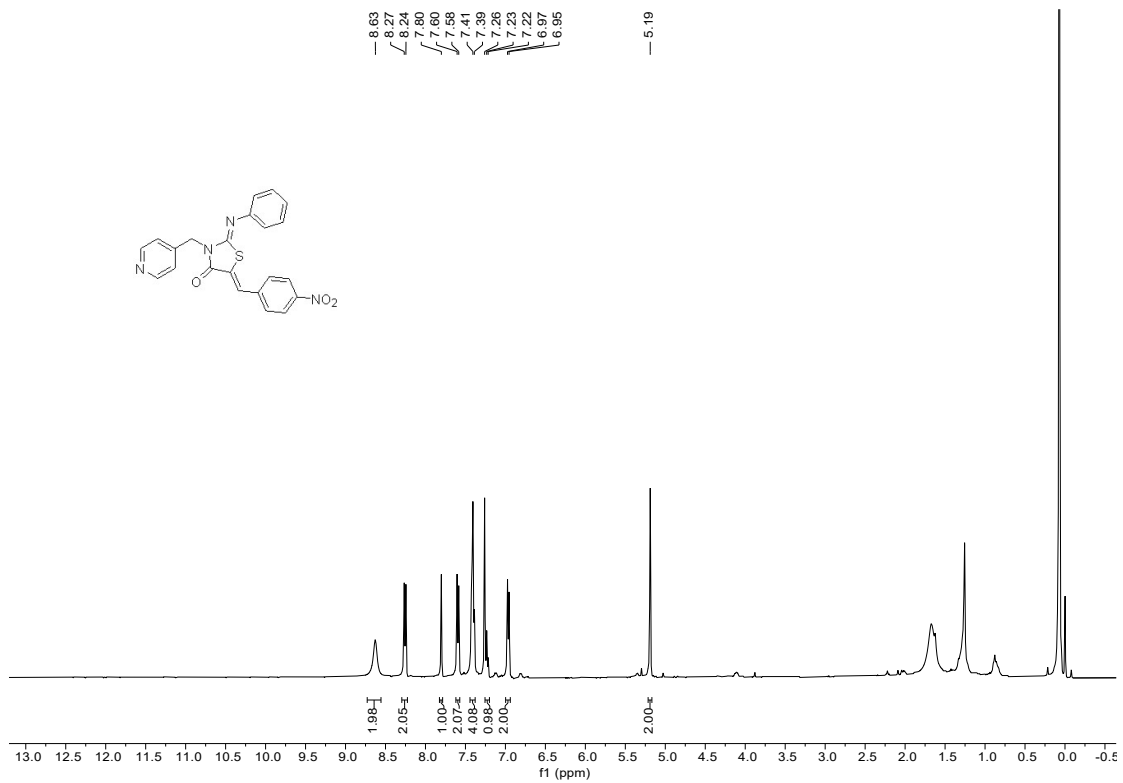

<sup>1</sup>H NMR of 7 in CDCl<sub>3</sub> (400 MHz)

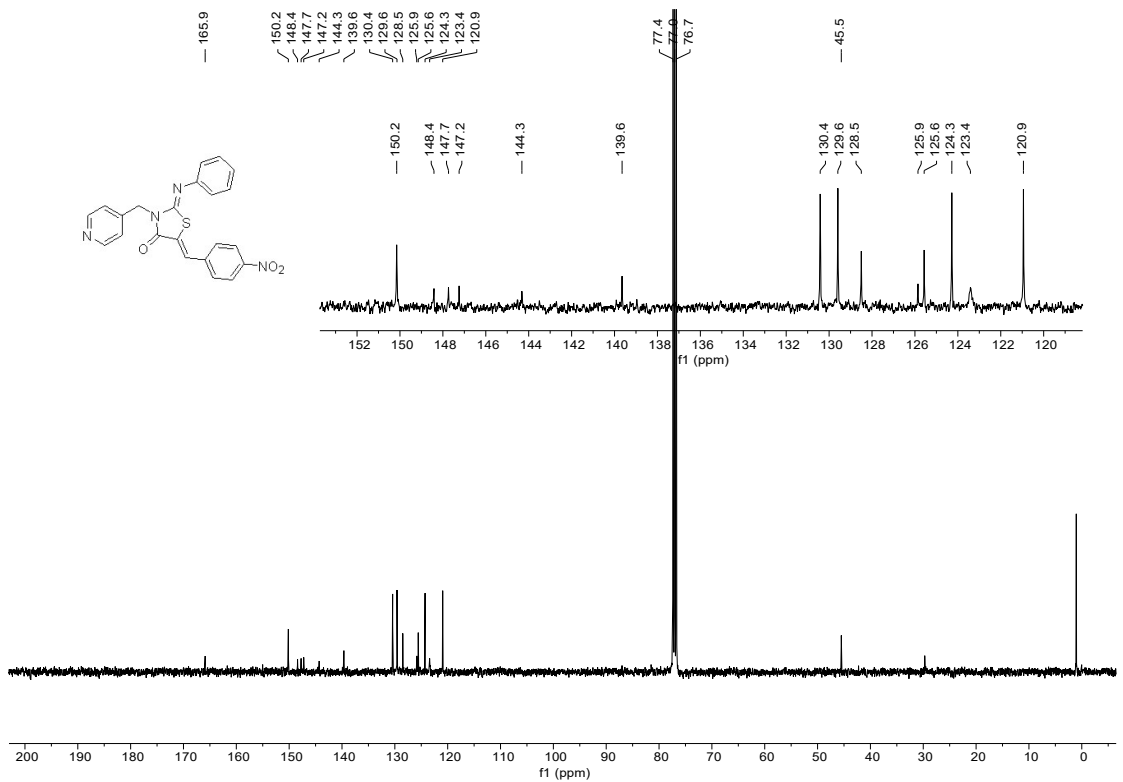

<sup>13</sup>C{<sup>1</sup>H} NMR of 7 in CDCl<sub>3</sub> (100 MHz)

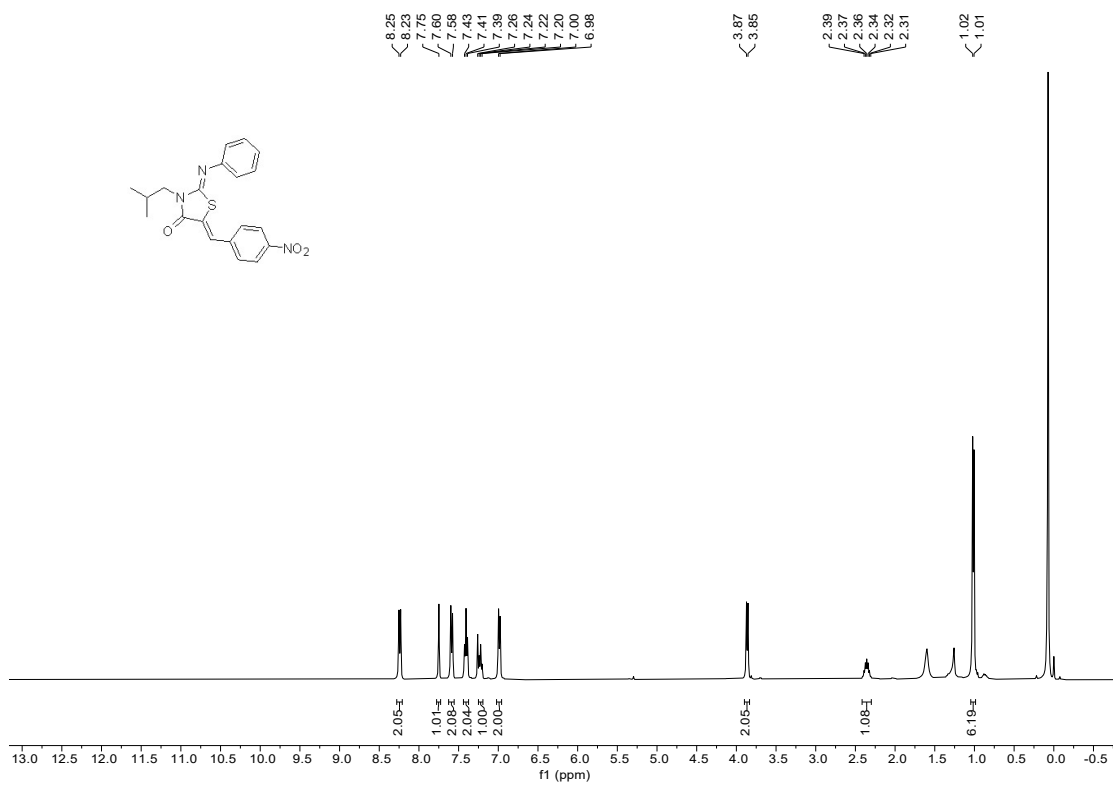

$^1\text{H}$  NMR of **8** in  $\text{CDCl}_3$  (400 MHz)

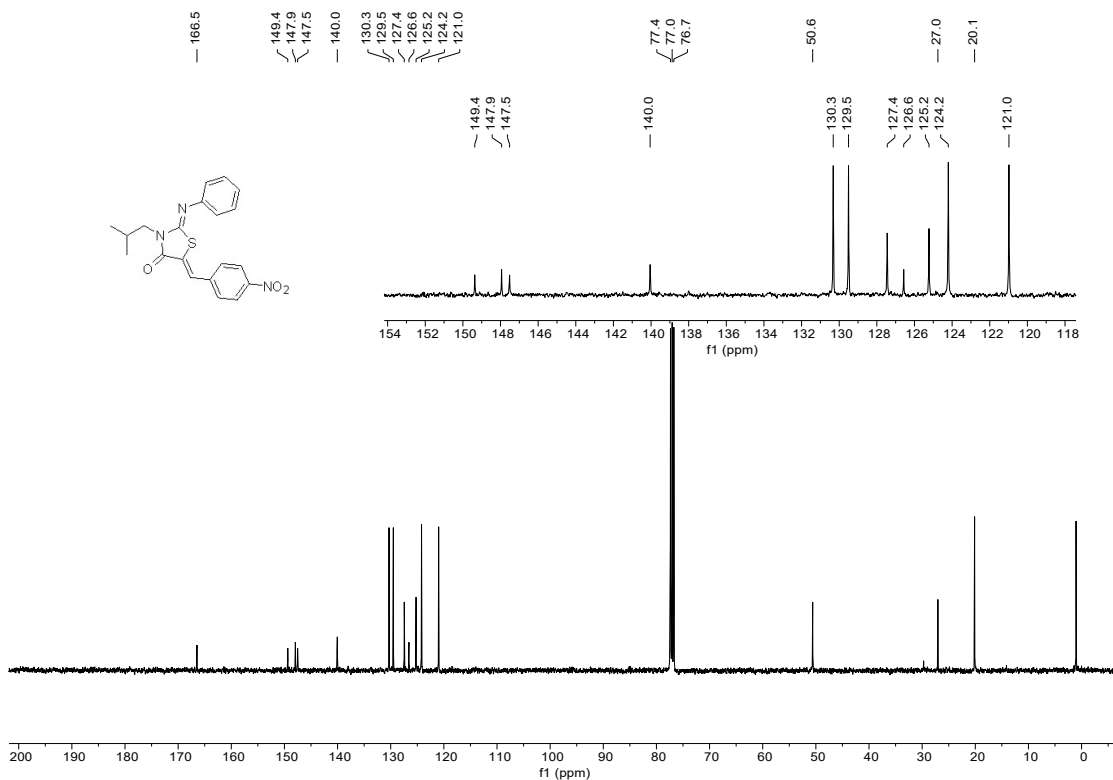

$^{13}\text{C}\{^1\text{H}\}$  NMR of **8** in  $\text{CDCl}_3$  (100 MHz)

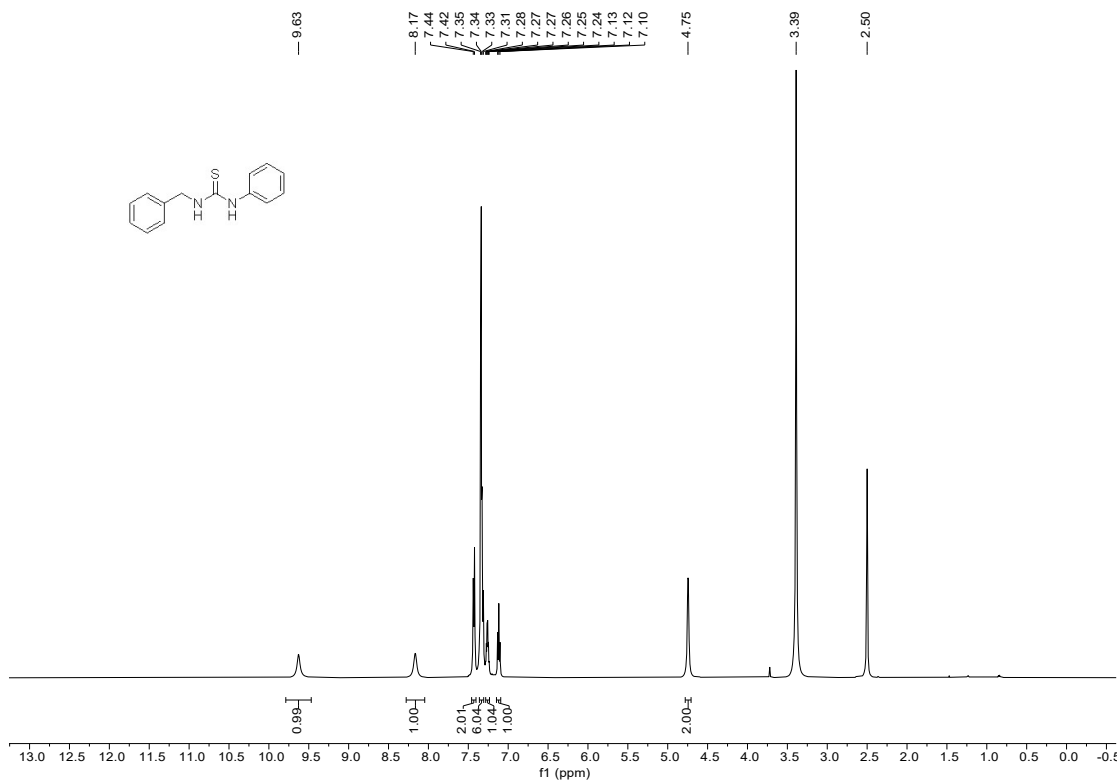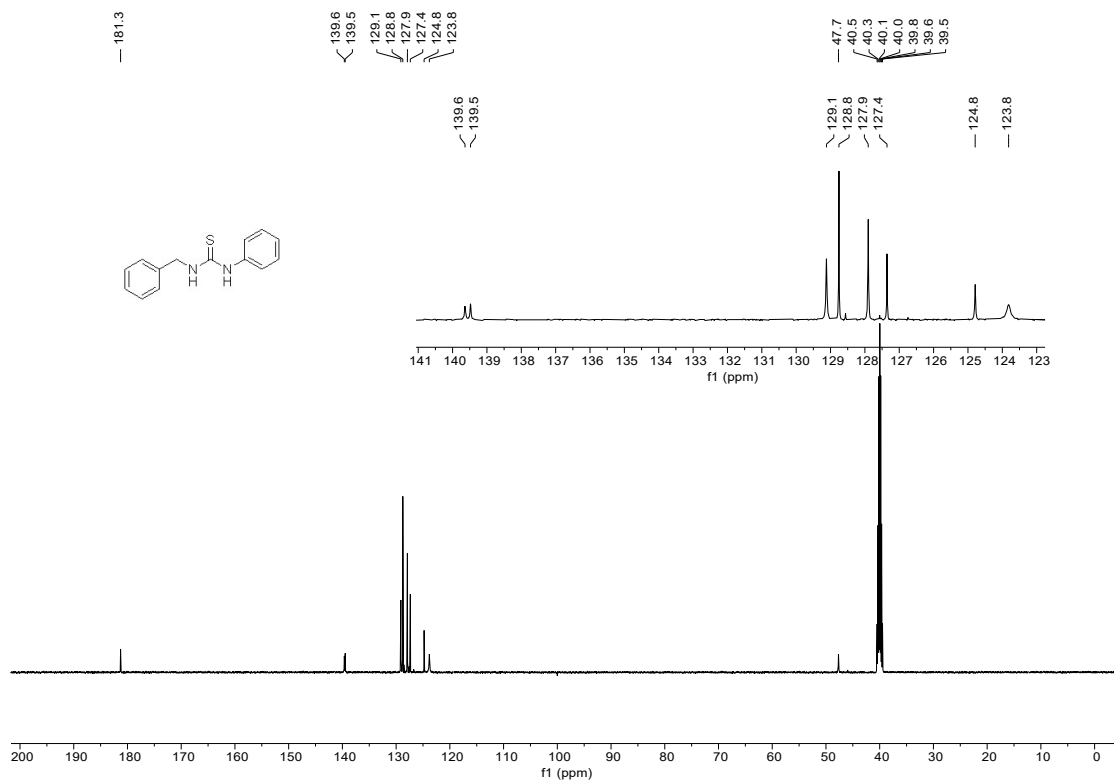

Supplement: d2ra07872d1.pdf [file d2ra07872d1.pdf]
